# Supplementary material for: Chiral phosphoric acid-catalysed Friedel–Crafts alkylation reaction of indoles with racemic spiro indolin-3-ones
Source: Royal Society of Chemistry journal article supplement (doi:10.1039/c1sc00190f), 2011-01-01
Supplement: c1sc00190f.pdf [file c1sc00190f.pdf]

*Supporting Information for*

**Chiral Phosphoric Acid-Catalysed Friedel-Crafts Alkylation  
Reaction of Indoles with Racemic Spiro Indolin-3-ones**

*Qin Yin and Shu-Li You*

*State Key Laboratory of Organometallic Chemistry  
Shanghai Institute of Organic Chemistry, Chinese Academy of Sciences  
345 Lingling Lu, Shanghai 200032, China  
Fax: (+86) 21-54925087  
E-mail: [slyou@mail.sioc.ac.cn](mailto:slyou@mail.sioc.ac.cn)*

**Contents**

|                                                                                 |     |
|---------------------------------------------------------------------------------|-----|
| General considerations.....                                                     | S2  |
| General procedure for preparation of spiro indolin-3-ones.....                  | S2  |
| Charaterization of products <b>2a-2f</b> .....                                  | S2  |
| General procedure for the Friedel-Crafts alkylation reaction.....               | S4  |
| Charaterization of products <b>4a-4o</b> .....                                  | S5  |
| General procedure for transformation of <b>4a</b> and <b>4g</b> .....           | S15 |
| Charaterization of products <b>5a</b> 、 <b>5g</b> 、 <b>6a</b> 、 <b>6g</b> ..... | S15 |
| Crystal data for ( <i>S</i> )- <b>4g</b> (CCDC 808591) .....                    | S19 |
| References.....                                                                 | S21 |
| Copies of spectra.....                                                          | S22 |

## 1. General considerations

Unless stated otherwise, all reactions were carried out in flame-dried glassware under a dry argon atmosphere. All solvents were purified and dried according to standard methods prior to use.  $^1\text{H}$  and  $^{13}\text{C}$  NMR spectra were recorded on a Varian instrument (300 MHz and 75 MHz, 400 MHz and 100 MHz, respectively) and internally referenced to tetramethylsilane signal or residual protio solvent signals. Data for  $^1\text{H}$  NMR are recorded as follows: chemical shift ( $\delta$ , ppm), multiplicity (s = singlet, d = doublet, t = triplet, m = multiplet or unresolved, br = broad singlet, coupling constant(s) in Hz, integration). Data for  $^{13}\text{C}$  NMR are reported in terms of chemical shift ( $\delta$ , ppm).

## 2. Experimental procedures, analytical and spectroscopic data

### 2.1. General procedure for preparation of spiro indolin-3-ones

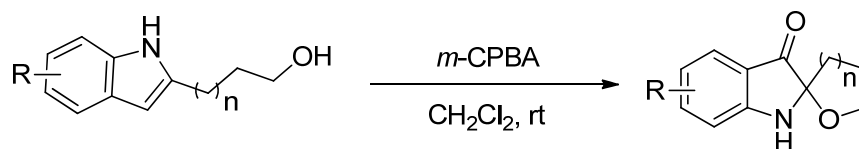

To 2-(3-hydroxypropyl)indole<sup>1</sup> ( $n = 1$ ) (10 mmol) in  $\text{CH}_2\text{Cl}_2$  (50 mL) was slowly added a solution of *m*-CPBA (22 mmol) in  $\text{CH}_2\text{Cl}_2$  (50 mL) at room temperature. The reaction was monitored by TLC. Upon consumption of the starting material (2 h), the mixture was added to a separatory funnel containing a saturated solution of  $\text{Na}_2\text{SO}_3$  and extracted with  $\text{CH}_2\text{Cl}_2$ . The combined organic extracts were washed with brine, dried over  $\text{MgSO}_4$ , then the solvent was evaporated under reduced pressure and the residue was purified by flash chromatography (ethyl acetate/petroleum ether = 1/4, v/v) to afford the product.

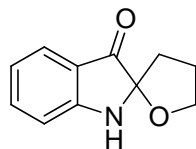

#### 4,5-Dihydro-3H-spiro[furan-2,2'-indolin]-3'-one (2a)

Yellow solid (33% yield) following silica gel column chromatography. Analytical data for **2a**: Mp = 57-59 °C;  $^1\text{H}$  NMR (300 MHz,  $\text{CDCl}_3$ )  $\delta$  1.99-2.12 (m, 2H), 2.27-2.34 (m, 2H), 4.09-4.16 (m, 2H), 4.73 (br, 1H), 6.76 (d,  $J = 8.4$  Hz, 1H), 6.84 (t,  $J = 7.8$  Hz, 1H), 7.44 (t,  $J = 7.8$  Hz, 1H), 7.58 (d,  $J = 7.8$  Hz, 1H);  $^{13}\text{C}$  NMR (75 MHz,  $\text{CDCl}_3$ )  $\delta$  25.7, 34.0, 69.2, 95.0, 112.1, 118.9, 119.5, 124.9, 137.9, 159.7, 201.0; IR

(film) 3329, 2926, 2877, 1713, 1615, 1486, 1468, 1422, 1318, 1239, 1192, 1156, 1130, 1101, 1017, 988, 960, 945, 930, 747, 686  $\text{cm}^{-1}$ ; HRMS (MALDI/DHB) exact mass calcd for  $\text{C}_{11}\text{H}_{12}\text{NO}_2^+$  (M+H) requires  $m/z$  190.0863. Found  $m/z$  190.0865.

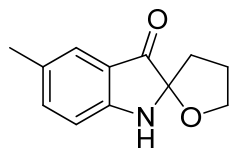

**5'-Methyl-4,5-dihydro-3H-spiro[furan-2,2'-indolin]-3'-one (2b)**

Yellow solid (31% yield) following silica gel column chromatography. Analytical data for **2b**: Mp = 88-90 °C;  $^1\text{H}$  NMR (300 MHz,  $\text{CDCl}_3$ )  $\delta$  1.92-2.14 (m, 2H), 2.17-2.31 (m, 5H), 4.03-4.15 (m, 2H), 4.95 (br, 1H), 6.68 (d,  $J = 8.4$  Hz, 1H), 7.25 (d,  $J = 8.1$  Hz, 1H), 7.34 (s, 1H);  $^{13}\text{C}$  NMR (75 MHz,  $\text{CDCl}_3$ )  $\delta$  20.3, 25.6, 34.1, 69.1, 95.4, 112.1, 119.1, 124.3, 128.9, 139.0, 158.1, 201.1; IR (film) 3304, 2918, 2868, 1705, 1619, 1586, 1494, 1436, 1293, 1118, 1061, 1019, 998, 973, 816, 774, 687  $\text{cm}^{-1}$ ; HRMS (EI) exact mass calcd for ( $\text{C}_{12}\text{H}_{13}\text{NO}_2$ ) requires  $m/z$  203.0946. Found  $m/z$  203.0949.

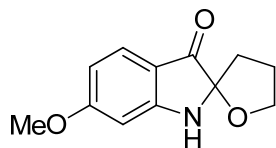

**6'-Methoxy-4,5-dihydro-3H-spiro[furan-2,2'-indolin]-3'-one (2c)**

Pale yellow solid (26% yield) following silica gel column chromatography. Analytical data for **2c**: Mp = 133-135 °C;  $^1\text{H}$  NMR (300 MHz,  $\text{CDCl}_3$ )  $\delta$  1.97-2.10 (m, 2H), 2.26-2.34 (m, 2H), 3.83 (s, 3H), 4.08-4.15 (m, 2H), 4.78 (br, 1H), 6.19 (s, 1H), 6.40 (d,  $J = 8.4$  Hz, 1H), 7.51 (d,  $J = 8.4$  Hz, 1H);  $^{13}\text{C}$  NMR (75 MHz,  $\text{CDCl}_3$ )  $\delta$  25.7, 34.1, 55.6, 69.3, 95.1, 95.7, 108.5, 112.3, 126.6, 162.0, 168.2, 198.4; IR (film) 3311, 2983, 2873, 1676, 1619, 1583, 1506, 1455, 1296, 1214, 1169, 1103, 1066, 1018, 974, 896, 820, 766, 694, 669  $\text{cm}^{-1}$ ; HRMS (MALDI/DHB) exact mass calcd for  $\text{C}_{12}\text{H}_{14}\text{NO}_3^+$  (M+H) requires  $m/z$  220.0968. Found  $m/z$  220.0976.

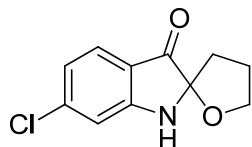

**6'-Chloro-4,5-dihydro-3H-spiro[furan-2,2'-indolin]-3'-one (2d)**

Pale yellow solid (36% yield) following silica gel column chromatography. Analytical data for **2d**: Mp = 137-139 °C;  $^1\text{H}$  NMR (300 MHz,  $\text{CDCl}_3$ )  $\delta$  1.97-2.11 (m, 2H), 2.18-2.30 (m, 2H), 4.04-4.11 (m, 2H), 5.17 (br, 1H), 6.73-6.78 (m, 2H), 7.47 (d,  $J =$

7.8 Hz, 1H);  $^{13}\text{C}$  NMR (75 MHz,  $\text{CDCl}_3$ )  $\delta$  25.6, 34.0, 69.3, 95.3, 111.9, 117.2, 120.1, 126.0, 144.3, 160.0, 199.6; IR (film) 3367, 2987, 2898, 1704, 1606, 1572, 1453, 1390, 1242, 1187, 1103, 1063, 1025, 1003, 975, 920, 893, 852, 765, 688  $\text{cm}^{-1}$ ; HRMS (MALDI/DHB) exact mass calcd for  $\text{C}_{11}\text{H}_{11}\text{NO}_2\text{Cl}^+$  (M+H) requires  $m/z$  224.0473. Found  $m/z$  224.0482.

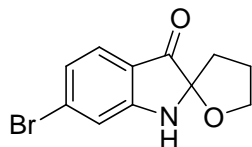

### 6'-Bromo-4,5-dihydro-3H-spiro[furan-2,2'-indolin]-3'-one (2e)

Pale yellow solid (36% yield) following silica gel column chromatography. Analytical data for **2e**: Mp = 149-151  $^{\circ}\text{C}$ ;  $^1\text{H}$  NMR (300 MHz,  $\text{CDCl}_3$ )  $\delta$  1.98-2.11 (m, 2H), 2.24-2.29 (m, 2H), 4.08-4.16 (m, 2H), 4.83 (br, 1H), 6.95 (s, 1H), 6.96 (d,  $J$  = 8.1 Hz, 1H), 7.41 (d,  $J$  = 11.1 Hz, 1H);  $^{13}\text{C}$  NMR (75 MHz,  $\text{CDCl}_3$ )  $\delta$  25.7, 34.0, 69.4, 95.2, 115.0, 117.6, 123.0, 126.0, 133.2, 160.0, 199.8; IR (film) 3363, 2987, 2901, 1703, 1664, 1603, 1568, 1453, 1407, 1310, 1262, 1066, 1053, 911, 855, 811, 763, 688  $\text{cm}^{-1}$ ; HRMS (MALDI/DHB) exact mass calcd for  $\text{C}_{11}\text{H}_{11}\text{NO}_2\text{Br}^+$  (M+H) requires  $m/z$  267.9968. Found  $m/z$  267.9979.

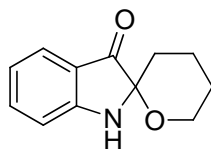

### 3',4',5',6'-Tetrahydrospiro[indoline-2,2'-pyran]-3-one (2f)

Pale yellow solid (59% yield) following silica gel column chromatography. Analytical data for **3f**: Mp = 117-119  $^{\circ}\text{C}$ ;  $^1\text{H}$  NMR (300 MHz,  $\text{CDCl}_3$ )  $\delta$  1.55-1.73 (m, 4H), 1.98-2.11 (m, 2H), 3.82-3.86 (m, 1H), 4.10-4.14 (m, 1H), 6.83-6.88 (m, 2H), 7.46 (t,  $J$  = 8.1 Hz, 1H), 7.61 (d,  $J$  = 8.4 Hz, 1H);  $^{13}\text{C}$  NMR (75 MHz,  $\text{CDCl}_3$ )  $\delta$  19.1, 24.6, 30.4, 63.7, 87.5, 112.7, 119.6, 119.8, 125.3, 137.8, 159.5, 199.0; IR (film) 3324, 2936, 2848, 1713, 1614, 1488, 1468, 1439, 1321, 1295, 1253, 1205, 1189, 1164, 1137, 1099, 1040, 1004, 921, 760, 690  $\text{cm}^{-1}$ ; HRMS (MALDI/DHB) exact mass calcd for  $\text{C}_{12}\text{H}_{13}\text{NO}_2\text{Na}^+$  (M+Na) requires  $m/z$  226.0838. Found  $m/z$  226.0848.

## 2.2. General procedure for the Friedel-Crafts alkylation reaction

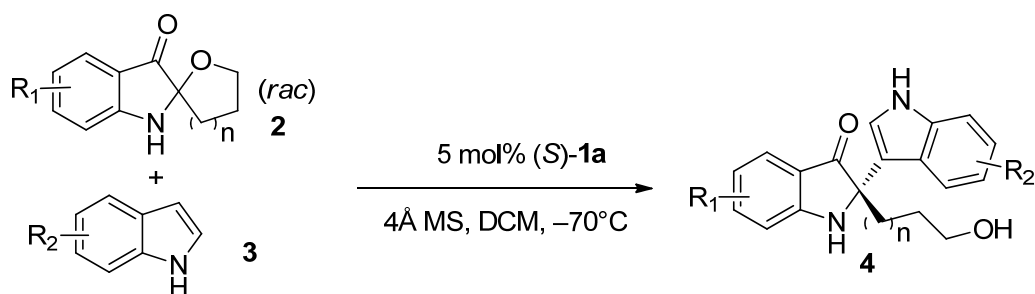

In a dry Schlenk tube, spiro indolin-3-one **2** (0.1 mmol), chiral phosphoric acid **1a** (0.005 mmol), 4 Å MS (10 mg), and CH<sub>2</sub>Cl<sub>2</sub> (1.0 mL) were added. The solution was cooled to -70 °C. After 15 min, indole (0.2 mmol) was added in one portion. After the reaction was complete (monitored by TLC), the reaction mixture was diluted by adding acetone. Then the reaction mixture was filtered through a plug of silica gel (washed with acetone) and purified by column chromatography (acetone/petroleum ether = 1/4~1/2, v/v) to afford product.

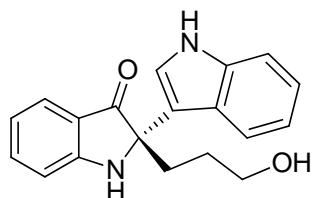

#### 2-(3-Hydroxypropyl)-2-(1H-indol-3-yl)indolin-3-one (**4a**)

Yellow solid (97% yield) following silica gel column chromatography. Analytical data for **4a**: Mp = 197-199 °C; [ $\alpha$ ]<sub>D</sub><sup>20</sup> = +635.3° (c = 1.0 Acetone, 98% ee); <sup>1</sup>H NMR (400 MHz, CD<sub>3</sub>OD)  $\delta$  1.34-1.48 (m, 1H), 1.58-1.66 (m, 1H), 2.19-2.39 (m, 2H), 3.54 (t, *J* = 6.4 Hz, 2H), 6.74 (t, *J* = 7.2 Hz, 1H), 6.87 (t, *J* = 7.2 Hz, 1H), 6.95 (d, *J* = 8.4 Hz, 1H), 7.04 (t, *J* = 7.2 Hz, 1H), 7.29-7.32 (m, 2H), 7.45-7.51 (m, 3H); <sup>13</sup>C NMR (100 MHz, CD<sub>3</sub>OD)  $\delta$  27.9, 34.5, 63.1, 70.5, 112.4, 113.1, 114.9, 118.7, 119.9, 120.4, 121.2, 122.5, 124.0, 125.4, 126.4, 138.7, 139.2, 163.4, 206.7; IR (film) 3674, 3250, 2987, 2901, 1709, 1664, 1614, 1492, 1465, 1409, 1328, 1242, 1128, 1049, 1008, 893, 755, 741, 715, 686 cm<sup>-1</sup>; HRMS (MALDI/DHB) exact mass calcd for C<sub>19</sub>H<sub>18</sub>N<sub>2</sub>O<sub>2</sub>Na<sup>+</sup> (M+Na) requires *m/z* 329.1261. Found *m/z* 329.1267. The enantiomeric ratio was determined by Daicel Chiralpak AD-H (25 cm), Hexanes / IPA = 80 / 20, 0.6 mL/min<sup>-1</sup>,  $\lambda$  = 254 nm, *t* (major) = 22.89 min, *t* (minor) = 20.86 min.

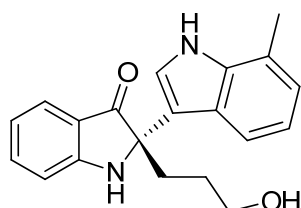

### 2-(3-Hydroxypropyl)-2-(7-methyl-1H-indol-3-yl)indolin-3-one (4b)

Yellow solid (98% yield) following silica gel column chromatography. Analytical data for **4b**: Decomposed temperature: 197 °C;  $[\alpha]_D^{20} = +545.7^\circ$  (c = 1.0 Acetone, 98% ee);  $^1\text{H NMR}$  (300 MHz,  $\text{CD}_3\text{OD}$ )  $\delta$  1.34-1.47 (m, 1H), 1.58-1.64 (m, 1H), 2.22-2.39 (m, 2H), 2.43 (s, 3H), 3.54 (t,  $J = 6.3$  Hz, 2H), 6.71-6.85 (m, 3H), 6.94 (d,  $J = 8.4$  Hz, 1H), 7.29-7.30 (m, 2H), 7.46-7.51 (m, 2H).  $^{13}\text{C NMR}$  (75 MHz,  $\text{CD}_3\text{OD}$ )  $\delta$  16.9, 27.9, 34.5, 63.1, 70.5, 113.1, 115.2, 118.7, 118.9, 120.2, 120.5, 121.8, 123.0, 123.8, 125.4, 126.1, 138.0, 139.2, 163.4, 206.8; IR (film) 3493, 3393, 3383, 3238, 3046, 2955, 2874, 1660, 1613, 1580, 1493, 1465, 1434, 1327, 1154, 1103, 1050, 1015, 924, 892, 785, 756, 674, 625, 615  $\text{cm}^{-1}$ ; HRMS (MALDI/DHB) exact mass calcd for  $\text{C}_{20}\text{H}_{20}\text{N}_2\text{O}_2\text{Na}^{+1}$  (M+Na) requires  $m/z$  343.1417. Found  $m/z$  343.1410. The enantiomeric ratio was determined by Daicel Chiralpak IC (25 cm), Hexanes / IPA = 80 / 20, 0.8  $\text{mL}/\text{min}^{-1}$ ,  $\lambda = 254$  nm, t (major) = 29.97 min, t (minor) = 20.60 min.

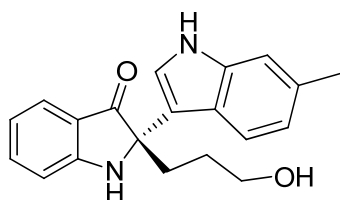

### 2-(3-Hydroxypropyl)-2-(6-methyl-1H-indol-3-yl)indolin-3-one (4c)

Yellow solid (92% yield) following silica gel column chromatography. Analytical data for **4c**: Mp = 193-195 °C;  $[\alpha]_D^{20} = +291.7^\circ$  (c = 0.8 Acetone, 99% ee);  $^1\text{H NMR}$  (400 MHz,  $\text{CD}_3\text{OD}$ )  $\delta$  1.40-1.46 (m, 1H), 1.58-1.63 (m, 1H), 2.21-2.34 (m, 2H), 2.36 (s, 3H), 3.54 (t,  $J = 6.8$  Hz, 2H), 6.71-6.76 (m, 2H), 6.96 (d,  $J = 8.4$  Hz, 1H), 7.10 (s, 1H), 7.20 (s, 1H), 7.33 (d,  $J = 8.4$  Hz, 1H), 7.48-7.52 (m, 2H);  $^{13}\text{C NMR}$  (100 MHz,  $\text{CD}_3\text{OD}$ )  $\delta$  21.7, 27.9, 34.5, 63.1, 70.6, 112.2, 113.1, 114.8, 118.7, 120.5, 120.9, 121.7, 123.3, 124.3, 125.4, 132.1, 139.1, 163.4, 206.7; IR (film) 3405, 3364, 3251, 2933, 2870, 1663, 1620, 1541, 1491, 1466, 1404, 1328, 1255, 1181, 1149, 1066, 1032, 954, 911, 886, 800, 750, 714, 686  $\text{cm}^{-1}$ ; HRMS (MALDI/DHB) exact mass calcd for  $\text{C}_{20}\text{H}_{21}\text{N}_2\text{O}_2^{+1}$  (M+H) requires  $m/z$  321.1598. Found  $m/z$  321.1603. The enantiomeric ratio was determined by Daicel Chiralpak IC (25 cm), Hexanes / IPA = 80 / 20, 0.8  $\text{mL}/\text{min}^{-1}$ ,  $\lambda = 254$  nm, t (major) = 36.52 min, t (minor) = 29.48 min.

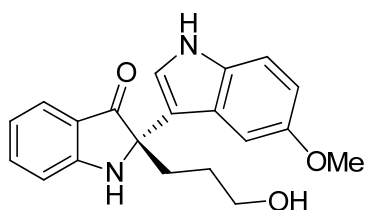

### 2-(3-Hydroxypropyl)-2-(5-methoxy-1H-indol-3-yl)indolin-3-one (4d)

Yellow solid (97% yield) following silica gel column chromatography. Analytical data for **4d**: Decomposed temperature: 205 °C;  $[\alpha]_D^{20} = +332.1^\circ$  ( $c = 0.5$  Acetone, 98% ee);  $^1\text{H NMR}$  (300 MHz,  $\text{CD}_3\text{OD}$ )  $\delta$  1.25-1.36 (m, 2H), 2.22-2.35 (m, 2H), 3.54-3.57 (m, 5H), 6.69 (dd,  $J_1 = 2.1$  Hz,  $J_2 = 9.0$  Hz, 1H), 6.76 (t,  $J = 7.2$  Hz, 1H), 6.86 (d,  $J = 2.1$  Hz, 1H), 6.98 (d,  $J = 8.4$  Hz, 1H), 7.19 (d,  $J = 8.7$  Hz, 1H), 7.28 (s, 1H), 7.50-7.55 (m, 2H);  $^{13}\text{C NMR}$  (100 MHz,  $\text{CD}_3\text{COCD}_3$ )  $\delta$  28.1, 34.3, 55.6, 62.7, 69.9, 103.5, 112.4, 112.9, 115.4, 118.4, 121.2, 124.4, 125.0, 126.7, 133.4, 137.9, 154.6, 162.3, 203.2; IR (film) 3664, 3375, 2960, 2902, 2499, 1675, 1615, 1481, 1463, 1323, 1210, 1177, 1065, 1028, 910, 890, 843, 826, 747, 680, 637  $\text{cm}^{-1}$ ; HRMS (MALDI/DHB) exact mass calcd for  $\text{C}_{20}\text{H}_{20}\text{N}_2\text{O}_3\text{Na}^+$  (M+Na) requires  $m/z$  359.1366. Found  $m/z$  359.1367. The enantiomeric ratio was determined by Daicel Chiralpak AD-H (25 cm), Hexanes / IPA = 80 / 20, 0.7  $\text{mL}/\text{min}^{-1}$ ,  $\lambda = 254$  nm,  $t$  (major) = 34.05 min,  $t$  (minor) = 24.64 min.

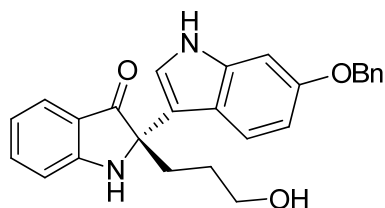

### 2-(6-(Benzyloxy)-1H-indol-3-yl)-2-(3-hydroxypropyl)indolin-3-one (4e)

Yellow solid (90% yield) following silica gel column chromatography. Analytical data for **4e**: Mp = 185-187 °C;  $[\alpha]_D^{20} = +326.0^\circ$  ( $c = 0.8$  Acetone, 99% ee);  $^1\text{H NMR}$  (300 MHz,  $\text{CD}_3\text{OD}$ )  $\delta$  1.34-1.45 (m, 1H), 1.57-1.61 (m, 1H), 2.19-2.33 (m, 2H), 3.54 (t,  $J = 6.3$  Hz, 3H), 5.03 (s, 2H), 6.63-6.66 (dd,  $J_1 = 2.1$  Hz,  $J_2 = 9.3$  Hz, 2H), 6.74 (t,  $J = 7.2$  Hz, 1H), 6.90-6.97 (m, 1H), 7.17 (s, 1H), 7.27-7.52 (m, 8H);  $^{13}\text{C NMR}$  (100 MHz,  $\text{CD}_3\text{OD}$ )  $\delta$  27.9, 34.5, 63.1, 70.6, 71.4, 97.1, 110.8, 113.1, 115.0, 118.7, 120.4, 121.1, 121.9, 123.0, 125.5, 128.5, 128.7, 129.4, 139.1, 139.2, 139.4, 156.5, 163.4, 206.7; IR (film) 3663, 3410, 3349, 3233, 2987, 2908, 1661, 1620, 1580, 1490, 1463, 1407, 1379, 1326, 1299, 1282, 1259, 1178, 1065, 1036, 1017, 955, 912, 795, 753, 700, 624  $\text{cm}^{-1}$ ; HRMS (EI) exact mass calcd for  $\text{C}_{26}\text{H}_{24}\text{N}_2\text{O}_3$  requires  $m/z$  412.1787. Found  $m/z$  412.1790. The enantiomeric ratio was determined by Daicel Chiralpak AD-H (25 cm), Hexanes / IPA = 70 / 30, 0.6  $\text{mL}/\text{min}^{-1}$ ,  $\lambda = 254$  nm,  $t$  (major) = 38.59 min,  $t$  (minor) = 30.85 min.

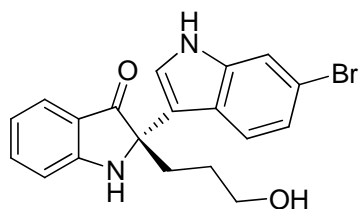

#### 2-(6-Bromo-1H-indol-3-yl)-2-(3-hydroxypropyl)indolin-3-one (**4f**)

Yellow solid (90% yield) following silica gel column chromatography. Analytical data for **4f**: Decomposed temperature: 175 °C;  $[\alpha]_D^{20} = +384.4^\circ$  ( $c = 1.0$  Acetone, 97% ee);  $^1\text{H NMR}$  (300 MHz,  $\text{CD}_3\text{OD}$ )  $\delta$  1.34-1.47 (m, 1H), 1.53-1.61 (m, 1H), 2.15-2.36 (m, 2H), 3.53 (t,  $J = 6.6$  Hz, 2H), 6.74 (t,  $J = 6.9$  Hz, 1H), 6.95-7.02 (m, 2H), 7.31 (s, 1H), 7.41 (d,  $J = 8.7$  Hz, 1H), 7.48-7.53 (m, 3H);  $^{13}\text{C NMR}$  (100 MHz,  $\text{CD}_3\text{COCD}_3$ )  $\delta$  28.1, 34.8, 62.6, 69.9, 112.9, 115.2, 115.4, 116.1, 118.6, 120.6, 122.7, 123.3, 124.7, 125.1, 125.4, 138.0, 139.2, 162.1, 203.0; IR (film) 3415, 2932, 2874, 2540, 2487, 1655, 1619, 1486, 1461, 1328, 1290, 1191, 1148, 1062, 1031, 928, 902, 804, 752, 672  $\text{cm}^{-1}$ ; HRMS (MALDI/DHB) exact mass calcd for  $\text{C}_{19}\text{H}_{17}\text{N}_2\text{O}_2\text{NaBr}^{+1}$  ( $\text{M}+\text{Na}$ ) requires  $m/z$  407.0365. Found  $m/z$  407.0366. The enantiomeric ratio was determined by Daicel Chiralpak AD-H (25 cm), Hexanes / IPA = 80 / 20, 0.7 mL/min $^{-1}$ ,  $\lambda = 254$  nm,  $t$  (major) = 34.66 min,  $t$  (minor) = 25.00 min.

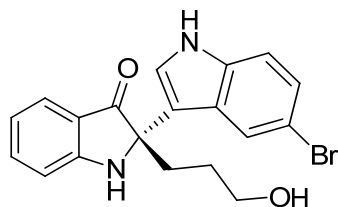

#### 2-(5-Bromo-1H-indol-3-yl)-2-(3-hydroxypropyl)indolin-3-one (**4g**)

Yellow solid (99% yield) following silica gel column chromatography. Analytical data for **4g**: Decomposed temperature: 209 °C;  $[\alpha]_D^{20} = +403.0^\circ$  ( $c = 1.0$  Acetone, 98% ee);  $^1\text{H NMR}$  (400 MHz,  $\text{CD}_3\text{OD}$ )  $\delta$  1.39-1.46 (m, 1H), 1.54-1.62 (m, 1H), 2.17-2.34 (m, 2H), 3.54 (t,  $J = 6.4$  Hz, 2H), 6.76 (t,  $J = 7.2$  Hz, 1H), 6.99 (d,  $J = 8.4$  Hz, 1H), 7.14 (dd,  $J_1 = 1.6$  Hz,  $J_2 = 8.6$  Hz, 1H), 7.24 (d,  $J = 8.8$  Hz, 1H), 7.34 (s, 1H), 7.50-7.55 (m, 2H), 7.69 (d,  $J = 1.6$  Hz, 1H);  $^{13}\text{C NMR}$  (100 MHz,  $\text{CD}_3\text{COCD}_3$ )  $\delta$  28.1, 35.0, 62.6, 69.9, 112.8, 112.9, 114.2, 115.7, 118.6, 120.6, 124.2, 124.9, 125.1, 125.3, 128.1, 137.0, 138.1, 162.1, 202.9; IR (film) 3440, 3234, 3033, 2945, 2851, 1650, 1617, 1498, 1463, 1332, 1300, 1156, 1117, 1102, 1054, 1020, 886, 864, 804, 788, 750, 720, 675  $\text{cm}^{-1}$ ; HRMS (MALDI/DHB) exact mass calcd for  $\text{C}_{19}\text{H}_{17}\text{N}_2\text{O}_2\text{NaBr}^{+1}$  ( $\text{M}+\text{Na}$ ) requires  $m/z$  407.0366. Found  $m/z$  407.0370. The enantiomeric ratio was determined



by Daicel Chiralpak AD-H (25 cm), Hexanes / IPA = 80 / 20, 0.7 mL/min<sup>-1</sup>, λ = 254 nm, t (major) = 16.80 min, t (minor) = 13.04 min.

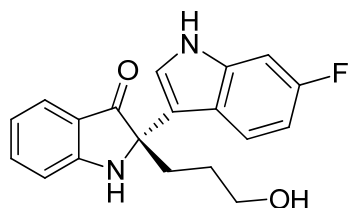

#### 2-(6-Fluoro-1H-indol-3-yl)-2-(3-hydroxypropyl)indolin-3-one (4h)

Yellow solid (96% yield) following silica gel column chromatography. Analytical data for **4h**: Decomposed temperature: 196 °C;  $[\alpha]_D^{20} = +295.2^\circ$  (c = 1.0 Acetone, 98% ee); <sup>1</sup>H NMR (400 MHz, CD<sub>3</sub>OD) δ 1.28-1.36 (m, 1H), 1.45-1.52 (m, 1H), 2.07-2.26 (m, 2H), 3.43 (t, *J* = 6.4 Hz, 2H), 6.57 (dt, *J*<sub>1</sub> = 2.0 Hz, *J*<sub>2</sub> = 9.6 Hz, 1H), 6.64 (t, *J* = 7.6 Hz, 1H), 6.86 (d, *J* = 8.4 Hz, 1H), 6.90 (dd, *J*<sub>1</sub> = 2.4 Hz, *J*<sub>2</sub> = 9.6 Hz, 1H), 7.18 (s, 1H), 7.32-7.42 (m, 3H); <sup>13</sup>C NMR (100 MHz, CD<sub>3</sub>OD) δ 27.9, 34.6, 63.0, 70.4, 98.1, 98.4, 108.2, 108.4, 113.1, 115.3, 118.8, 120.3, 122.2, 122.3, 123.1, 124.5, 124.6, 125.5, 139.3, 163.4, 206.4; <sup>19</sup>F NMR(300 MHz, CD<sub>3</sub>COCD<sub>3</sub>) δ -127.9; IR (film) 3416, 3344, 2935, 2877, 1658, 1615, 1491, 1462, 1404, 1329, 1298, 1178, 1142, 1064, 1034, 960, 839, 756, 615 cm<sup>-1</sup>; HRMS (MALDI/DHB) exact mass calcd for C<sub>19</sub>H<sub>17</sub>N<sub>2</sub>O<sub>2</sub>NaF<sup>+1</sup> (M+Na) requires *m/z* 347.1166. Found *m/z* 347.1160. The enantiomeric ratio was determined by Daicel Chiralpak AD-H (25 cm), Hexanes / IPA = 80 / 20, 0.7 mL/min<sup>-1</sup>, λ = 254 nm, t (major) = 20.82 min, t (minor) = 17.86 min.

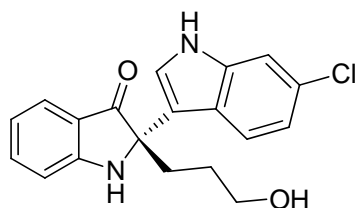

#### 2-(6-Chloro-1H-indol-3-yl)-2-(3-hydroxypropyl)indolin-3-one (4i)

Yellow solid (88% yield) following silica gel column chromatography. Analytical data for **4i**: Mp = 220-222 °C;  $[\alpha]_D^{20} = +278.3^\circ$  (c = 1.0 Acetone, 96% ee); <sup>1</sup>H NMR (400 MHz, CD<sub>3</sub>OD) δ 1.38-1.47 (m, 1H), 1.53-1.62 (m, 1H), 2.16-2.36 (m, 2H), 3.54 (t, *J* = 6.4 Hz, 2H), 6.75 (t, *J* = 7.6 Hz, 1H), 6.87 (dd, *J*<sub>1</sub> = 2.0 Hz, *J*<sub>2</sub> = 8.0 Hz, 1H), 6.97 (d, *J* = 8.4 Hz, 1H), 7.32 (s, 2H), 7.45-7.53 (m, 3H); <sup>13</sup>C NMR (100 MHz, CD<sub>3</sub>OD) δ 27.9, 34.6, 63.0, 70.3, 112.2, 113.1, 115.4, 118.9, 120.3, 120.4, 122.4, 124.9, 125.1, 125.5, 128.4, 139.1, 139.2, 163.3, 206.3; IR (film) 3415, 2932, 2874, 2541, 2487, 2411, 1656, 1617, 1487, 1463, 1328, 1291, 1193, 1150, 1062, 1032, 939,

907, 805, 752, 678  $\text{cm}^{-1}$ ; HRMS (MALDI/DHB) exact mass calcd for  $\text{C}_{19}\text{H}_{18}\text{N}_2\text{O}_2\text{Cl}^+$  (M+H) requires  $m/z$  341.1051. Found  $m/z$  341.1062. The enantiomeric ratio was determined by Daicel Chiralpak AD-H (25 cm), Hexanes / IPA = 80 / 20, 0.7 mL/min<sup>-1</sup>,  $\lambda$  = 254 nm,  $t$  (major) = 28.25 min,  $t$  (minor) = 22.07 min.

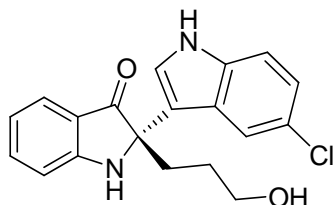

#### 2-(5-Chloro-1H-indol-3-yl)-2-(3-hydroxypropyl)indolin-3-one (4j)

Yellow solid (97% yield) following silica gel column chromatography. Analytical data for **4j**: Mp = 219-221 °C;  $[\alpha]_{\text{D}}^{20}$  = +520.3° (c = 1.0 Acetone, 98% ee); <sup>1</sup>H NMR (400 MHz, CD<sub>3</sub>OD)  $\delta$  1.39-1.47 (m, 1H), 1.53-1.61 (m, 1H), 2.15-2.35 (m, 2H), 3.54 (t,  $J$  = 6.6 Hz, 2H), 6.75 (t,  $J$  = 7.5 Hz, 1H), 6.96-7.04 (m, 2H), 7.28 (d,  $J$  = 8.7 Hz, 1H), 7.35 (s, 1H), 7.49-7.53 (m, 3H); <sup>13</sup>C NMR (75 MHz, CD<sub>3</sub>OD)  $\delta$  27.9, 34.7, 63.0, 70.3, 113.1, 113.6, 115.0, 118.9, 120.2, 120.8, 122.7, 125.5, 125.6, 125.7, 127.4, 137.1, 139.3, 163.4, 206.3; IR (film) 3489, 3415, 2945, 2428, 1654, 1618, 1489, 1457, 1329, 1195, 1135, 1107, 1051, 879, 864, 751, 717  $\text{cm}^{-1}$ ; HRMS (MALDI/DHB) exact mass calcd for  $\text{C}_{19}\text{H}_{18}\text{N}_2\text{O}_2\text{Cl}^+$  (M+H) requires  $m/z$  341.1051. Found  $m/z$  341.1055. The enantiomeric ratio was determined by Daicel Chiralpak AD-H (25 cm), Hexanes / IPA = 80 / 20, 0.7 mL/min<sup>-1</sup>,  $\lambda$  = 254 nm,  $t$  (major) = 15.94 min,  $t$  (minor) = 12.84 min.

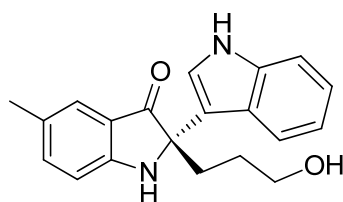

#### 2-(3-Hydroxypropyl)-2-(1H-indol-3-yl)-5-methylindolin-3-one (4k)

Yellow solid (95% yield) following silica gel column chromatography. Analytical data for **4k**: Mp = 182-184 °C;  $[\alpha]_{\text{D}}^{20}$  = +296° (c = 0.1 Acetone, 96% ee); <sup>1</sup>H NMR (400 MHz, CD<sub>3</sub>SOCD<sub>3</sub>)  $\delta$  1.23-1.31 (m, 1H), 1.41-1.48 (m, 1H), 2.02-2.23 (m, 2H), 2.23 (s, 3H), 3.35-3.40 (m, 2H), 4.44 (t,  $J$  = 5.6 Hz, 1H), 6.84-6.89 (m, 2H), 7.03 (t,  $J$  = 7.6 Hz, 1H), 7.21 (s, 1H), 7.31-7.41 (m, 4H), 7.55 (s, 1H), 10.99 (br, 1H); <sup>13</sup>C NMR (100 MHz, CD<sub>3</sub>SOCD<sub>3</sub>)  $\delta$  20.2, 27.1, 33.4, 61.1, 68.9, 111.6, 111.8, 114.1, 118.6, 119.0, 120.2, 121.1, 123.2, 123.3, 125.1, 125.8, 136.8, 138.9, 159.9, 202.9; IR (film) 3398, 3253, 2946, 2921, 1659, 1627, 1580, 1502, 1335, 1296, 1245, 1210, 1110, 1012,

826, 740  $\text{cm}^{-1}$ ; HRMS (MALDI/DHB) exact mass calcd for  $\text{C}_{20}\text{H}_{21}\text{N}_2\text{O}_2^{+1}$  (M+H) requires  $m/z$  321.1598. Found  $m/z$  321.1605. The enantiomeric ratio was determined by Daicel Chiralpak AD-H (25 cm), Hexanes / IPA =80 / 20, 0.7 mL/min<sup>-1</sup>,  $\lambda$  = 254 nm, t (major) = 20.11 min, t (minor) = 33.93 min.

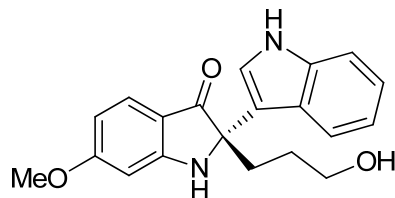

#### 2-(3-Hydroxypropyl)-2-(1H-indol-3-yl)-6-methoxyindolin-3-one (4l)

Gray solid (96% yield) following silica gel column chromatography. Analytical data for **4l**: Decomposed temperature: 220 °C;  $[\alpha]_{\text{D}}^{20} = +458.0^{\circ}$  (c = 0.5 Acetone, 97% ee); <sup>1</sup>H NMR (400 MHz, CD<sub>3</sub>OD)  $\delta$  1.41-1.47 (m, 1H), 1.58-1.64 (m, 1H), 2.20-2.38 (m, 2H), 3.55 (t,  $J$  = 6.4 Hz, 2H), 3.88 (s, 3H), 6.35 (dd,  $J_1$  = 2.0 Hz,  $J_2$  = 8.8 Hz, 1H), 6.42 (d,  $J$  = 2.0 Hz, 1H), 6.87 (dt,  $J_1$  = 1.2 Hz,  $J_2$  = 6.8 Hz, 1H), 7.04 (dt,  $J_1$  = 1.2 Hz,  $J_2$  = 6.8 Hz, 1H), 7.29 (s, 1H), 7.31 (d,  $J$  = 8.0 Hz, 1H), 7.39-7.43 (m, 2H); <sup>13</sup>C NMR (100 MHz, CD<sub>3</sub>COCD<sub>3</sub>)  $\delta$  28.1, 34.8, 55.9, 62.8, 70.4, 95.0, 108.2, 112.3, 114.6, 116.3, 119.6, 121.6, 122.2, 123.6, 126.4, 126.6, 138.3, 164.2, 168.7, 200.6; IR (film) 3414, 3287, 2924, 2857, 1662, 1612, 1578, 1454, 1438, 1285, 1216, 1173, 1101, 1056, 1022, 903, 737  $\text{cm}^{-1}$ ; HRMS (MALDI/DHB) exact mass calcd for  $\text{C}_{20}\text{H}_{21}\text{N}_2\text{O}_3^{+1}$  (M+H) requires  $m/z$  337.1547. Found  $m/z$  337.1552. The enantiomeric ratio was determined by Daicel Chiralpak AD-H (25 cm), Hexanes / IPA =80 / 20, 0.7 mL/min<sup>-1</sup>,  $\lambda$  = 254 nm, t (major) = 28.95 min, t (minor) = 23.98 min.

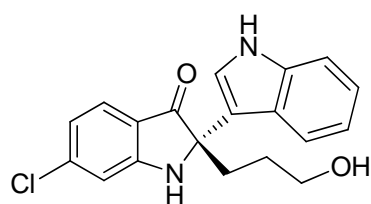

#### 6-Chloro-2-(3-hydroxypropyl)-2-(1H-indol-3-yl)indolin-3-one (4m)

Yellow solid (92% yield) following silica gel column chromatography. Analytical data for **4m**: Decomposed temperature: 191 °C;  $[\alpha]_{\text{D}}^{20} = +555.0^{\circ}$  (c = 1.0 Acetone, 89% ee); <sup>1</sup>H NMR (300 MHz, CD<sub>3</sub>OD)  $\delta$  1.34-1.49 (m, 1H), 1.55-1.65 (m, 1H), 2.18-2.41 (m, 2H), 3.54 (t,  $J$  = 6.6 Hz, 2H), 6.72 (dd,  $J_1$  = 1.2 Hz,  $J_2$  = 8.4 Hz, 1H), 6.91 (t,  $J$  = 6.6 Hz, 1H), 6.98 (d,  $J$  = 1.2 Hz, 1H), 7.06 (t,  $J$  = 7.5 Hz, 1H), 7.28 (s, 1H), 7.32 (d,  $J$  = 8.1 Hz, 1H), 7.46 (d,  $J$  = 8.4 Hz, 2H); <sup>13</sup>C NMR (100 MHz, CD<sub>3</sub>COCD<sub>3</sub>)  $\delta$  28.0, 34.6, 62.6, 70.7, 112.3, 112.4, 115.2, 118.7, 119.5, 119.8, 121.4, 122.4, 123.8,

126.3, 126.5, 138.4, 143.6, 162.2, 201.8; IR (film) 3378, 2956, 2935, 2518, 1680, 1610, 1567, 1454, 1373, 1316, 1245, 1102, 1057, 1010, 1022, 926, 893, 751, 687  $\text{cm}^{-1}$ ; HRMS (MALDI/DHB) exact mass calcd for  $\text{C}_{19}\text{H}_{18}\text{N}_2\text{O}_2\text{Cl}^{+1}$  (M+H) requires  $m/z$  341.1051. Found  $m/z$  341.1056. The enantiomeric ratio was determined by Daicel Chiralpak AD-H (25 cm), Hexanes / IPA = 80 / 20, 0.7 mL/min $^{-1}$ ,  $\lambda$  = 254 nm, t (major) = 25.29 min, t (minor) = 21.68 min.

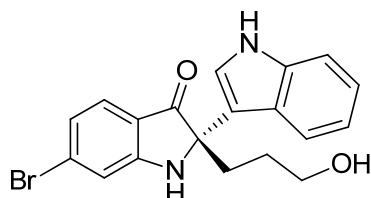

#### 6-Bromo-2-(3-hydroxypropyl)-2-(1H-indol-3-yl)indolin-3-one (4n)

Yellow solid (95% yield) following silica gel column chromatography. Analytical data for **4n**: Decomposed temperature: 221 °C;  $[\alpha]_{\text{D}}^{20} = +263.6^{\circ}$  (c = 1.0 Acetone, 88% ee);  $^1\text{H}$  NMR (300 MHz,  $\text{CD}_3\text{OD}$ )  $\delta$  1.38-1.45 (m, 1H), 1.57-1.63 (m, 1H), 2.22-2.36 (m, 2H), 3.54 (t,  $J = 6.3$  Hz, 2H), 6.85-6.93 (m, 2H), 7.06 (t,  $J = 7.2$  Hz, 1H), 7.17 (s, 1H), 7.28 (s, 1H), 7.32 (d,  $J = 8.1$  Hz, 1H), 7.39 (d,  $J = 8.1$  Hz, 1H), 7.46 (d,  $J = 8.1$  Hz, 1H);  $^{13}\text{C}$  NMR (100 MHz,  $\text{CD}_3\text{COCD}_3$ )  $\delta$  28.1, 34.6, 62.6, 70.6, 112.4, 115.1, 115.4, 119.8, 121.4, 121.5, 122.4, 123.8, 126.3, 126.6, 132.5, 138.4, 143.6, 162.3, 202.0; IR (film) 3376, 2934, 2548, 2518, 1678, 1605, 1457, 1315, 1103, 1055, 1005, 913, 893, 750, 680  $\text{cm}^{-1}$ ; HRMS (MALDI/DHB) exact mass calcd for  $\text{C}_{19}\text{H}_{17}\text{N}_2\text{O}_2\text{BrNa}^{+1}$  (M+Na) requires  $m/z$  407.0365. Found  $m/z$  407.0377. The enantiomeric ratio was determined by Daicel Chiralpak AD-H (25 cm), Hexanes / IPA = 80 / 20, 0.7 mL/min $^{-1}$ ,  $\lambda$  = 254 nm, t (major) = 22.98 min, t (minor) = 19.37 min.

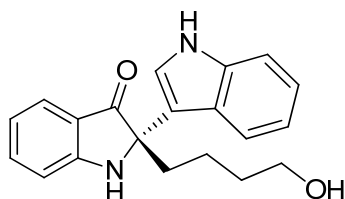

#### 2-(4-Hydroxybutyl)-2-(1H-indol-3-yl)indolin-3-one (4o)

Yellow solid (98% yield) following silica gel column chromatography. Analytical data for **4o**: Decomposed temperature: 170 °C;  $[\alpha]_{\text{D}}^{20} = +250.4^{\circ}$  (c = 1.0 Acetone, 87% ee);  $^1\text{H}$  NMR (300 MHz,  $\text{CD}_3\text{OD}$ )  $\delta$  1.24-1.29 (m, 1H), 1.46-1.57 (m, 3H), 2.17-2.33 (m, 2H), 3.49 (t,  $J = 6.3$  Hz, 2H), 6.74 (t,  $J = 7.5$  Hz, 1H), 6.87 (t,  $J = 7.5$  Hz, 1H), 6.96 (d,  $J = 8.7$  Hz, 1H), 7.04 (t,  $J = 7.2$  Hz, 1H), 7.28 (s, 1H), 7.31 (d,  $J = 8.7$  Hz, 1H), 7.44-7.53 (m, 3H);  $^{13}\text{C}$  NMR (75 MHz,  $\text{CD}_3\text{SOCD}_3$ )  $\delta$  20.1, 32.9, 36.7, 60.6,

68.9, 111.6, 111.7, 113.9, 116.9, 118.5, 118.8, 120.2, 121.1, 123.2, 124.1, 125.0, 136.8, 137.4, 161.3, 202.8; IR (film) 3366, 3259, 2988, 2949, 1665, 1616, 1493, 1464, 1354, 1293, 1135, 1099, 1069, 990, 943, 891, 743, 692  $\text{cm}^{-1}$ ; HRMS (MALDI/DHB) exact mass calcd for  $\text{C}_{20}\text{H}_{20}\text{N}_2\text{O}_2\text{Na}^{+1}$  (M+Na) requires  $m/z$  343.1417. Found  $m/z$  343.1417. The enantiomeric ratio was determined by Daicel Chiralpak IC (25 cm), Hexanes / IPA = 80 / 20, 1.0  $\text{mL}/\text{min}^{-1}$ ,  $\lambda = 254 \text{ nm}$ ,  $t$  (major) = 29.06 min,  $t$  (minor) = 12.58 min.

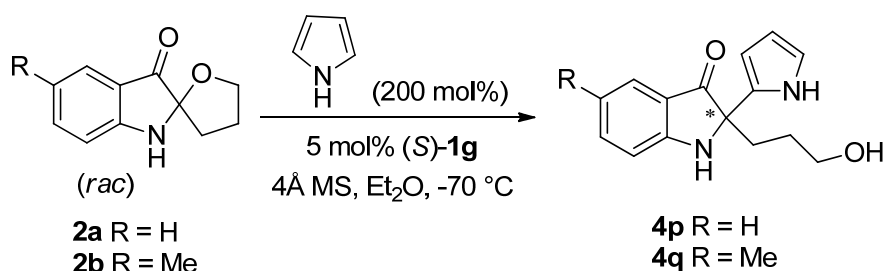

In a dry Schlenk tube, spiro indolin-3-one **2a** (18.9 mg, 0.1 mmol), chiral phosphoric acid **1g** (3.9 mg, 0.005 mmol), 4Å MS (10 mg), and  $\text{Et}_2\text{O}$  (1.0 mL) were added. The solution was cooled to  $-70 \text{ }^\circ\text{C}$ . After 15 minute, pyrrole (13.4 mg, 0.2 mmol) was added in one portion. After the reaction was complete (monitored by TLC), the reaction mixture was diluted by adding acetone. Then the reaction mixture was filtered through a plug of silica gel (washed with acetone) and purified by column chromatography (acetone/petroleum ether = 1/4~1/2, v/v) to afford product.

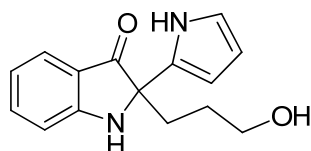

#### 2-(3-hydroxypropyl)-2-(1H-pyrrol-2-yl)indolin-3-one (**4p**)

Yellow solid (92% yield) following silica gel column chromatography. Analytical data for **4p**: Mp = 61-63  $^\circ\text{C}$ ;  $[\alpha]_{\text{D}}^{20} = +683.5^\circ$  ( $c = 1.0$  Acetone, 96% ee);  $^1\text{H}$  NMR (300 MHz,  $\text{CD}_3\text{COCD}_3$ )  $\delta$  1.27-1.42 (m, 2H), 1.89-2.00 (m, 2H), 3.35-3.41 (m, 2H), 3.48 (t,  $J = 5.1 \text{ Hz}$ , 1H), 5.85 (m, 1H), 5.98 (br, 1H), 6.59-6.64 (m, 2H), 6.80 (br, 1H), 6.87 (d,  $J = 8.4 \text{ Hz}$ , 1H), 7.30-7.37 (m, 2H), 9.80 (br, 1H);  $^{13}\text{C}$  NMR (100 MHz,  $\text{CD}_3\text{COCD}_3$ )  $\delta$  28.1, 35.3, 62.4, 69.5, 105.8, 108.3, 113.1, 118.7, 118.9, 119.9, 125.2, 130.4, 137.9, 162.3, 201.9; IR (film) 3351, 2927, 2855, 1677, 1617, 1489, 1467, 1324, 1294, 1195, 1151, 1110, 1053, 887, 750, 721  $\text{cm}^{-1}$ ; HRMS (EI) exact mass calcd for  $\text{C}_{15}\text{H}_{16}\text{N}_2\text{O}_2$  requires  $m/z$  256.1212. Found  $m/z$  256.1210. The enantiomeric ratio was

determined by Daicel Chiralpak AD-H (25 cm), Hexanes / IPA = 80 / 20, 1.0 mL/min<sup>-1</sup>,  $\lambda = 254$  nm,  $t$  (major) = 34.69 min,  $t$  (minor) = 9.01 min.

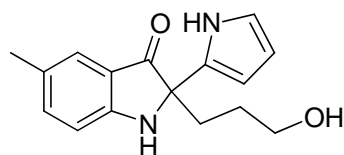

#### 2-(3-hydroxypropyl)-5-methyl-2-(1H-pyrrol-2-yl)indolin-3-one (**4q**)

Yellow solid (90% yield) following silica gel column chromatography. Analytical data for **4q**: Mp = 48-50 °C;  $[\alpha]_D^{20} = +523.8^\circ$  ( $c = 1.0$  Acetone, 97% ee); <sup>1</sup>H NMR (300 MHz, CD<sub>3</sub>COCD<sub>3</sub>)  $\delta$  1.29-1.41 (m, 2H), 1.89-2.00 (m, 2H), 2.13 (s, 3H), 3.36-3.41 (m, 2H), 3.45-3.47 (m, 1H), 5.86 (m, 1H), 5.98 (br, 1H), 6.59 (br, 2H), 6.81 (d,  $J = 5.4$  Hz, 1H), 7.12 (s, 1H), 7.21 (d,  $J = 8.4$  Hz, 1H), 9.79 (br, 1H); <sup>13</sup>C NMR (100 MHz, CD<sub>3</sub>COCD<sub>3</sub>)  $\delta$  20.4, 28.2, 35.4, 62.5, 69.8, 105.8, 108.3, 113.1, 118.8, 120.2, 124.5, 128.0, 130.7, 139.3, 160.9, 202.0; IR (film) 3359, 2924, 1672, 1625, 1499, 1432, 1271, 1213, 1055, 952, 902, 813, 723 cm<sup>-1</sup>; HRMS (MALDI/DHB) exact mass calcd for C<sub>16</sub>H<sub>19</sub>N<sub>2</sub>O<sub>2</sub><sup>+1</sup> (M+H) requires  $m/z$  271.1441. Found  $m/z$  271.1445. The enantiomeric ratio was determined by Daicel Chiralpak AD-H (25 cm), Hexanes / IPA = 80 / 20, 1.0 mL/min<sup>-1</sup>,  $\lambda = 254$  nm,  $t$  (major) = 11.70 min,  $t$  (minor) = 8.54 min.

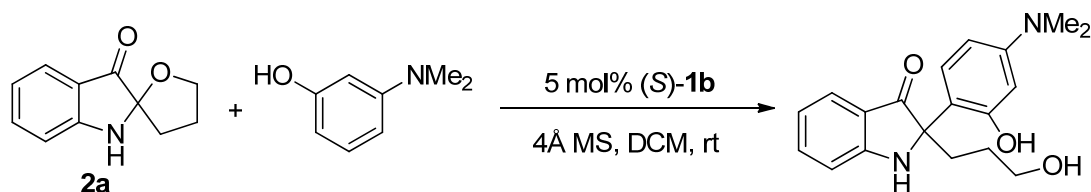

In a dry Schlenk tube, spiro indolin-3-one **2a** (18.9 mg, 0.1 mmol), chiral phosphoric acid **1b** (4.4 mg, 0.005 mmol), 4Å MS (10 mg), and 3-(dimethylamino)phenol (27.4 mg, 0.2 mmol) were stirred in CH<sub>2</sub>Cl<sub>2</sub> (1.0 mL) at room temperature. After the reaction was complete (monitored by TLC), the reaction mixture was filtered through a plug of silica gel (washed with DCM) and purified by column chromatography (acetone/petroleum ether = 1/4~1/2, v/v) to afford product **4r**.

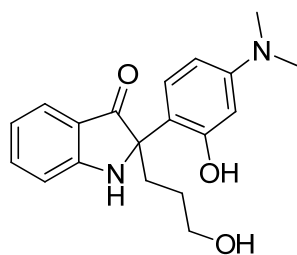

#### 2-(4-(dimethylamino)-2-hydroxyphenyl)-2-(3-hydroxypropyl)indolin-3-one (**4r**)

Yellow solid (93% yield) following silica gel column chromatography. Analytical data for **4r**: Mp = 72-74 °C;  $[\alpha]_D^{20} = +173.3^\circ$  (c = 1.0 Acetone, 50% ee);  $^1\text{H}$  NMR (300 MHz,  $\text{CD}_3\text{COCD}_3$ )  $\delta$  1.20-1.30 (m, 2H), 1.94-2.00 (m, 1H), 2.06-2.12 (m, 1H), 2.70 (s, 6H), 3.29-3.35 (m, 2H), 3.46 (t,  $J = 5.4$  Hz, 1H), 6.05 (dd,  $J_1 = 2.7$  Hz,  $J_2 = 9.0$  Hz, 1H), 6.10 (d,  $J = 2.7$  Hz, 1H), 6.60 (t,  $J = 7.5$  Hz, 1H), 6.88 (d,  $J = 8.7$  Hz, 1H), 7.10 (s, 1H), 7.12 (d,  $J = 2.1$  Hz, 1H), 7.32-7.37 (m, 2H), 9.60 (s, 1H);  $^{13}\text{C}$  NMR (75 MHz,  $\text{CD}_3\text{COCD}_3$ )  $\delta$  28.4, 34.3, 40.4, 62.4, 73.0, 102.9, 105.1, 113.2, 113.6, 118.8, 119.7, 125.3, 128.4, 139.0, 152.6, 157.5, 162.1, 206.6; IR (film) 2959, 1659, 1613, 1523, 1490, 1468, 1361, 1327, 1239, 1056, 987, 752  $\text{cm}^{-1}$ ; HRMS (EI) exact mass calcd for  $\text{C}_{19}\text{H}_{22}\text{N}_2\text{O}_3$  requires  $m/z$  326.1630. Found  $m/z$  326.1631. The enantiomeric ratio was determined by Daicel Chiralpak AD-H (25 cm), Hexanes / IPA = 80 / 20, 0.8  $\text{mL}/\text{min}^{-1}$ ,  $\lambda = 254$  nm,  $t$  (major) = 14.52 min,  $t$  (minor) = 12.13 min.

### 2.3. General procedure for transformation of **4a** and **4g**

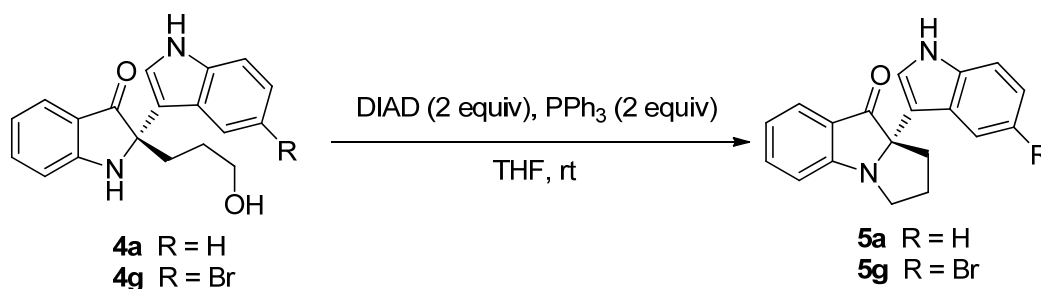

In a dry Schlenk tube, compound **4a** (30.6 mg, 0.1 mmol), DIAD (40.4 mg, 0.2 mmol) and  $\text{PPh}_3$  (52.5 mg, 0.2 mmol) were dissolved in 1.0 mL THF at room temperature. After 48 hours, the solvent was evaporated under reduced pressure and the residue was purified by column chromatography (ethyl acetate/petroleum ether = 1/5, v/v) to afford product **5a**.

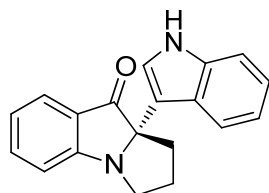

#### (S)-9a-(1H-Indol-3-yl)-2,3-dihydro-1H-pyrrolo[1,2-a]indol-9(9aH)-one (**5a**)

Pale yellow solid (64% yield) following silica gel column chromatography. Analytical data for **5a**: Mp = 190-192 °C;  $[\alpha]_D^{20} = +74.1^\circ$  (c = 0.5 Acetone, 92% ee);  $^1\text{H}$  NMR (300 MHz,  $\text{CDCl}_3$ )  $\delta$  1.96-2.16 (m, 3H), 2.50-2.54 (m, 1H), 3.31-3.36 (m, 1H), 3.62-3.67 (m, 1H), 6.90-7.00 (m, 2H), 7.04-7.17 (m, 3H), 7.25-7.30 (m, 1H), 7.54-7.59 (m,

2H), 7.83 (d,  $J = 7.8$  Hz, 1H), 8.24 (br, 1H);  $^{13}\text{C}$  NMR (75 MHz,  $\text{CDCl}_3$ )  $\delta$  28.1, 33.0, 50.3, 77.8, 111.2, 113.7, 114.6, 119.7, 120.3, 121.0, 122.1, 122.3, 122.4, 125.2, 125.4, 137.1, 137.2, 164.7, 203.8; IR (film) 3673, 3290, 2973, 2924, 1682, 1608, 1475, 1457, 1324, 1152, 1105, 1077, 1011, 984, 889, 770, 743, 697  $\text{cm}^{-1}$ ; HRMS (MALDI/DHB) exact mass calcd for  $\text{C}_{19}\text{H}_{17}\text{N}_2\text{O}^+$  (M+H) requires  $m/z$  289.1335. Found  $m/z$  289.1332. The enantiomeric ratio was determined by Daicel Chiralpak AD-H (25 cm), Hexanes / IPA = 70 / 30, 0.8  $\text{mL}/\text{min}^{-1}$ ,  $\lambda = 254$  nm,  $t$  (major) = 14.29 min,  $t$  (minor) = 26.73 min.

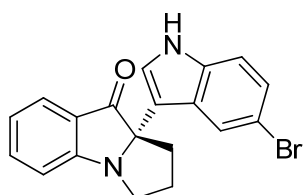

**(S)-9a-(5-Bromo-1H-indol-3-yl)-2,3-dihydro-1H-pyrrolo[1,2-a]indol-9(9aH)-one (5g)**

Pale yellow solid (55% yield) following silica gel column chromatography. Analytical data for **5g**: Mp = 181-183  $^{\circ}\text{C}$ ;  $[\alpha]_{\text{D}}^{20} = +373^{\circ}$  ( $c = 0.3$  Acetone, 94% ee);  $^1\text{H}$  NMR (300 MHz,  $\text{CDCl}_3$ )  $\delta$  2.05-2.13 (m, 3H), 2.47-2.49 (m, 1H), 3.35-3.38 (m, 1H), 3.66-3.69 (m, 1H), 6.95-7.02 (m, 2H), 7.16-7.29 (m, 3H), 7.57-7.59 (m, 1H), 8.06 (s, 1H), 8.15-8.17 (br, 1H).  $^{13}\text{C}$  NMR (75 MHz,  $\text{CDCl}_3$ )  $\delta$  28.0, 33.3, 50.3, 77.6, 112.7, 112.9, 113.8, 114.3, 120.6, 122.2, 123.4, 124.9, 125.1, 127.0, 135.7, 137.5, 164.7, 203.7; IR (film) 3673, 3425, 2971, 2923, 1688, 1606, 1475, 1456, 1318, 1101, 1067, 1006, 990, 883, 863, 806, 757, 696  $\text{cm}^{-1}$ ; HRMS (MALDI/DHB) exact mass calcd for  $\text{C}_{19}\text{H}_{16}\text{N}_2\text{OBr}^+$  (M+H) requires  $m/z$  367.0440. Found  $m/z$  367.0439. The enantiomeric ratio was determined by Daicel Chiralpak AD-H (25 cm), Hexanes / IPA = 80 / 20, 0.8  $\text{mL}/\text{min}^{-1}$ ,  $\lambda = 254$  nm,  $t$  (major) = 15.51 min,  $t$  (minor) = 11.38 min.

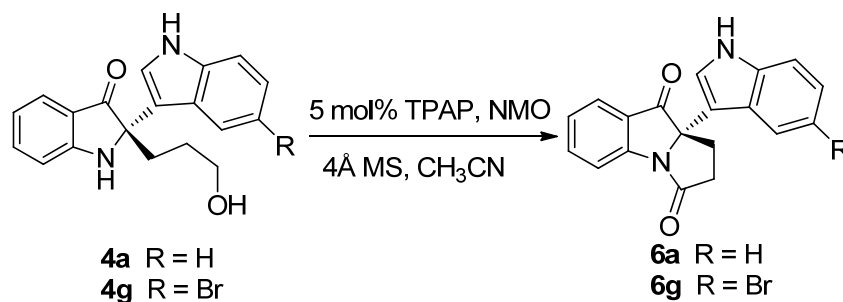

In a dry Schlenk tube, 4Å molecular sieves (10 mg), N-methylmorpholine N-oxide (35 mg, 0.3 mmol), and **4a** (30.6 mg, 0.1 mmol) were stirred in 1 mL acetonitrile at



25°C. Tetrapropylammonium perruthenate (2 mg, 0.005 mmol) was added and the mixture was stirred for 15-45 minutes until consumption of the alcohol was complete (as monitored by TLC). The reaction mixture was filtered through a plug of silica gel (washed with ethyl acetate) and purified by column chromatography (ethyl acetate/petroleum ether = 1/5, v/v) to afford product **6a**.

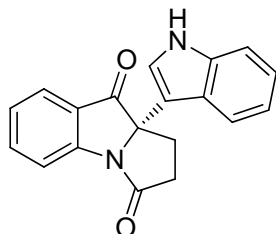

**(S)-9a-(1H-indol-3-yl)-1H-pyrrolo[1,2-a]indole-3,9(2H,9aH)-dione (6a)**

White solid (77% yield) following silica gel column chromatography. Analytical data for **6a**: Mp = 208-210 °C;  $[\alpha]_D^{20} = +162.1^\circ$  (c = 1.0 Acetone, 97% ee);  $^1\text{H NMR}$  (300 MHz,  $\text{CD}_3\text{OD}$ )  $\delta$  2.50-2.59 (m, 2H), 2.77-2.90 (m, 2H), 7.01 (t,  $J = 7.2$  Hz, 1H), 7.11 (t,  $J = 7.2$  Hz, 1H), 7.23-7.28 (m, 2H), 7.34 (d,  $J = 7.8$  Hz, 1H), 7.61 (d,  $J = 7.8$  Hz, 1H), 7.70-7.79 (m, 2H), 7.92 (d,  $J = 8.4$  Hz, 1H);  $^{13}\text{C NMR}$  (100 MHz,  $\text{CD}_3\text{SOCD}_3$ )  $\delta$  28.3, 34.4, 73.5, 111.0, 112.1, 116.2, 119.2, 119.8, 121.6, 123.2, 123.4, 124.4, 124.7, 125.0, 137.1, 137.3, 149.7, 173.5, 199.1; IR (film) 3332, 2926, 2853, 1709, 1602, 1460, 1430, 1341, 1219, 1179, 1095, 837, 750, 674  $\text{cm}^{-1}$ ; HRMS (EI) exact mass calcd for  $\text{C}_{19}\text{H}_{14}\text{N}_2\text{O}_2$  requires  $m/z$  302.1055. Found  $m/z$  302.1057. The enantiomeric ratio was determined by Daicel Chiralpak AD-H (25 cm), Hexanes / IPA = 80 / 20, 1.0  $\text{mL}/\text{min}^{-1}$ ,  $\lambda = 254$  nm,  $t$  (major) = 19.83 min,  $t$  (minor) = 17.70 min.

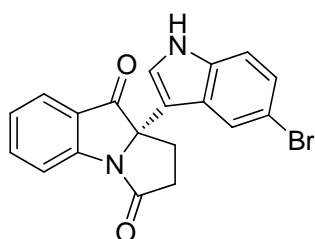

**(S)-9a-(5-bromo-1H-indol-3-yl)-1H-pyrrolo[1,2-a]indole-3,9(2H,9aH)-dione (6g)**

White solid (72% yield) following silica gel column chromatography. Analytical data for **6g**: Mp = 132-134 °C;  $[\alpha]_D^{20} = +239^\circ$  (c = 0.3 Acetone, 98% ee);  $^1\text{H NMR}$  (400 MHz,  $\text{CD}_3\text{OD}$ )  $\delta$  2.51-2.60 (m, 2H), 2.72-2.76 (m, 1H), 2.86-2.95 (m, 1H), 7.21 (dd,  $J_1 = 2.0$  Hz,  $J_2 = 8.4$  Hz, 1H), 7.25-7.29 (m, 2H), 7.31 (s, 1H), 7.63 (dd,  $J_1 = 0.8$  Hz,  $J_2 = 8.8$  Hz, 1H), 7.74 (dt,  $J_1 = 1.2$  Hz,  $J_2 = 8.4$  Hz, 1H), 7.92 (d,  $J = 8.4$  Hz, 1H), 7.96 (d,  $J = 2.0$  Hz, 1H);  $^{13}\text{C NMR}$  (100 MHz,  $\text{CD}_3\text{OD}$ )  $\delta$  30.1, 35.4, 75.3, 112.5, 113.8, 114.5,

117.6, 123.8, 125.1, 125.9, 126.2, 126.2, 126.4, 127.6, 137.8, 138.1, 150.9, 175.7, 200.6; IR (film) 2926, 2853, 1704, 1602, 1464, 1339, 1230, 1216, 1177, 1099, 982, 880, 797, 670  $\text{cm}^{-1}$ ; HRMS (EI) exact mass calcd for  $\text{C}_{19}\text{H}_{13}\text{N}_2\text{O}_2\text{Br}$  requires  $m/z$  380.0160. Found  $m/z$  380.0157. The enantiomeric ratio was determined by Daicel Chiralpak AD-H (25 cm), Hexanes / IPA = 80 / 20, 1.0  $\text{mL}/\text{min}^{-1}$ ,  $\lambda = 254 \text{ nm}$ , t (major) = 36.45 min, t (minor) = 14.58 min.

### 3. Crystal data and structure refinement for (*S*)-5g

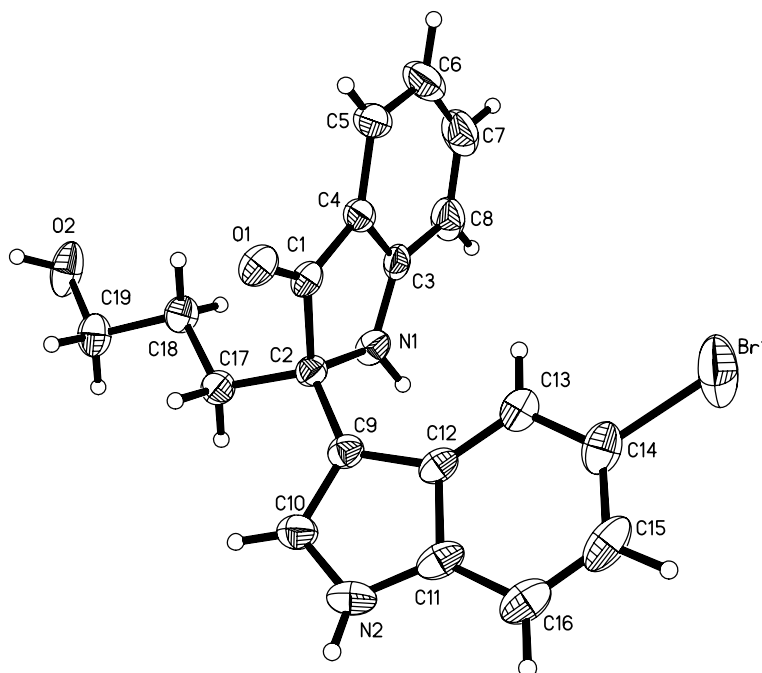

ORTEP diagram at 30% thermal ellipsoids (CCDC 808591)

**Table 1.** Crystal data and structure refinement for cd201665.

|                             |                                                                                                          |
|-----------------------------|----------------------------------------------------------------------------------------------------------|
| Identification code         | cd201665                                                                                                 |
| Empirical formula           | C <sub>19</sub> H <sub>17</sub> Br N <sub>2</sub> O <sub>2</sub>                                         |
| Formula weight              | 385.26                                                                                                   |
| Temperature                 | 293(2) K                                                                                                 |
| Wavelength                  | 0.71073 Å                                                                                                |
| Crystal system, space group | Orthorhombic, P2(1)2(1)2(1)                                                                              |
| Unit cell dimensions        | a = 7.8404(7) Å alpha = 90 deg.<br>b = 10.9935(10) Å beta = 90 deg.<br>c = 20.0870(18) Å gamma = 90 deg. |
| Volume                      | 1731.4(3) Å <sup>3</sup>                                                                                 |
| Z, Calculated density       | 4, 1.478 Mg/m <sup>3</sup>                                                                               |

Absorption coefficient 2.387 mm<sup>-1</sup>  
F(000) 784  
Crystal size 0.304 x 0.171 x 0.156 mm  
Theta range for data collection 2.03 to 27.50 deg.  
Limiting indices -10 ≤ h ≤ 9, -14 ≤ k ≤ 12, -14 ≤ l ≤ 25  
Reflections collected / unique 10420 / 3934 [R(int) = 0.0324]  
Completeness to theta = 27.50 99.7 %  
Absorption correction Empirical  
Max. and min. transmission 1.0000 and 0.5638  
Refinement method Full-matrix least-squares on F<sup>2</sup>  
Data / restraints / parameters 3934 / 3 / 229  
Goodness-of-fit on F<sup>2</sup> 1.027  
Final R indices [I > 2σ(I)] R1 = 0.0459, wR2 = 0.1043  
R indices (all data) R1 = 0.0764, wR2 = 0.1173  
Absolute structure parameter 0.005(11)  
Largest diff. peak and hole 0.506 and -0.289 e.Å<sup>-3</sup>

## Reference:

1. A. Tsotinis, P. A. Afroudakis, K. Davidson, A. Prashar and D. Sugden, *J. Med. Chem.* 2007, **50**, 6436-6440.

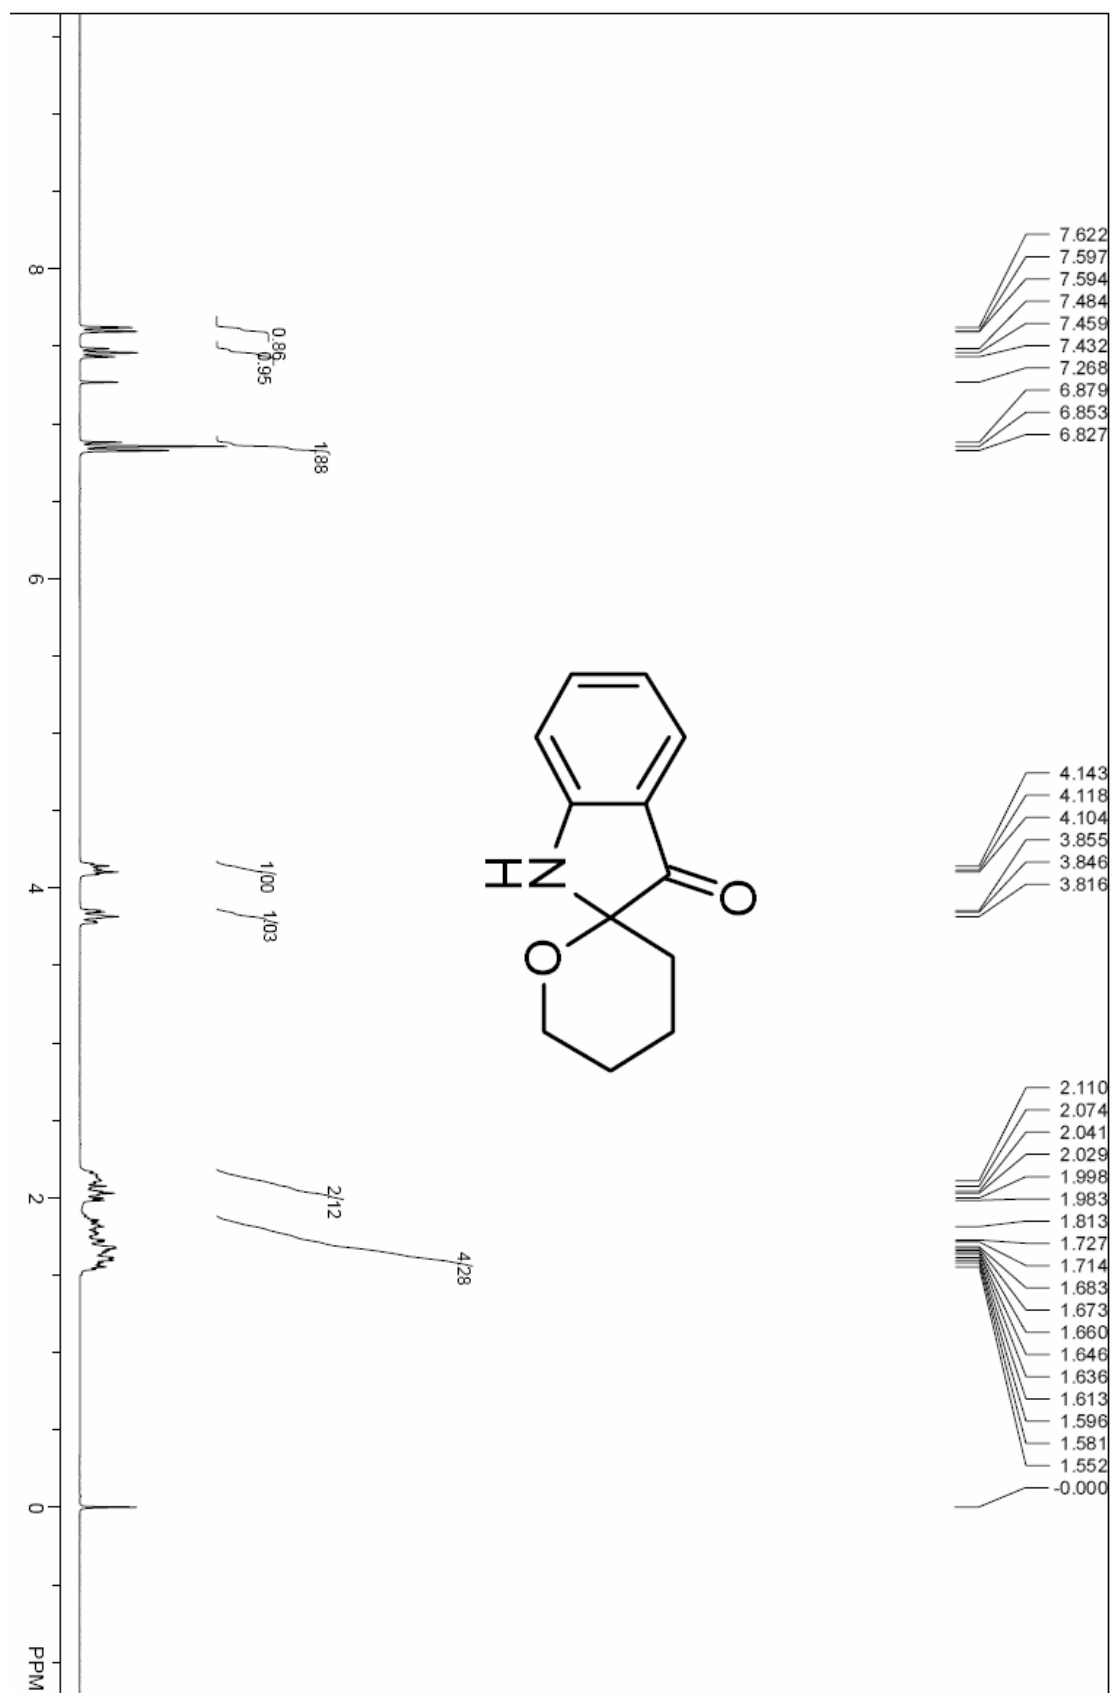

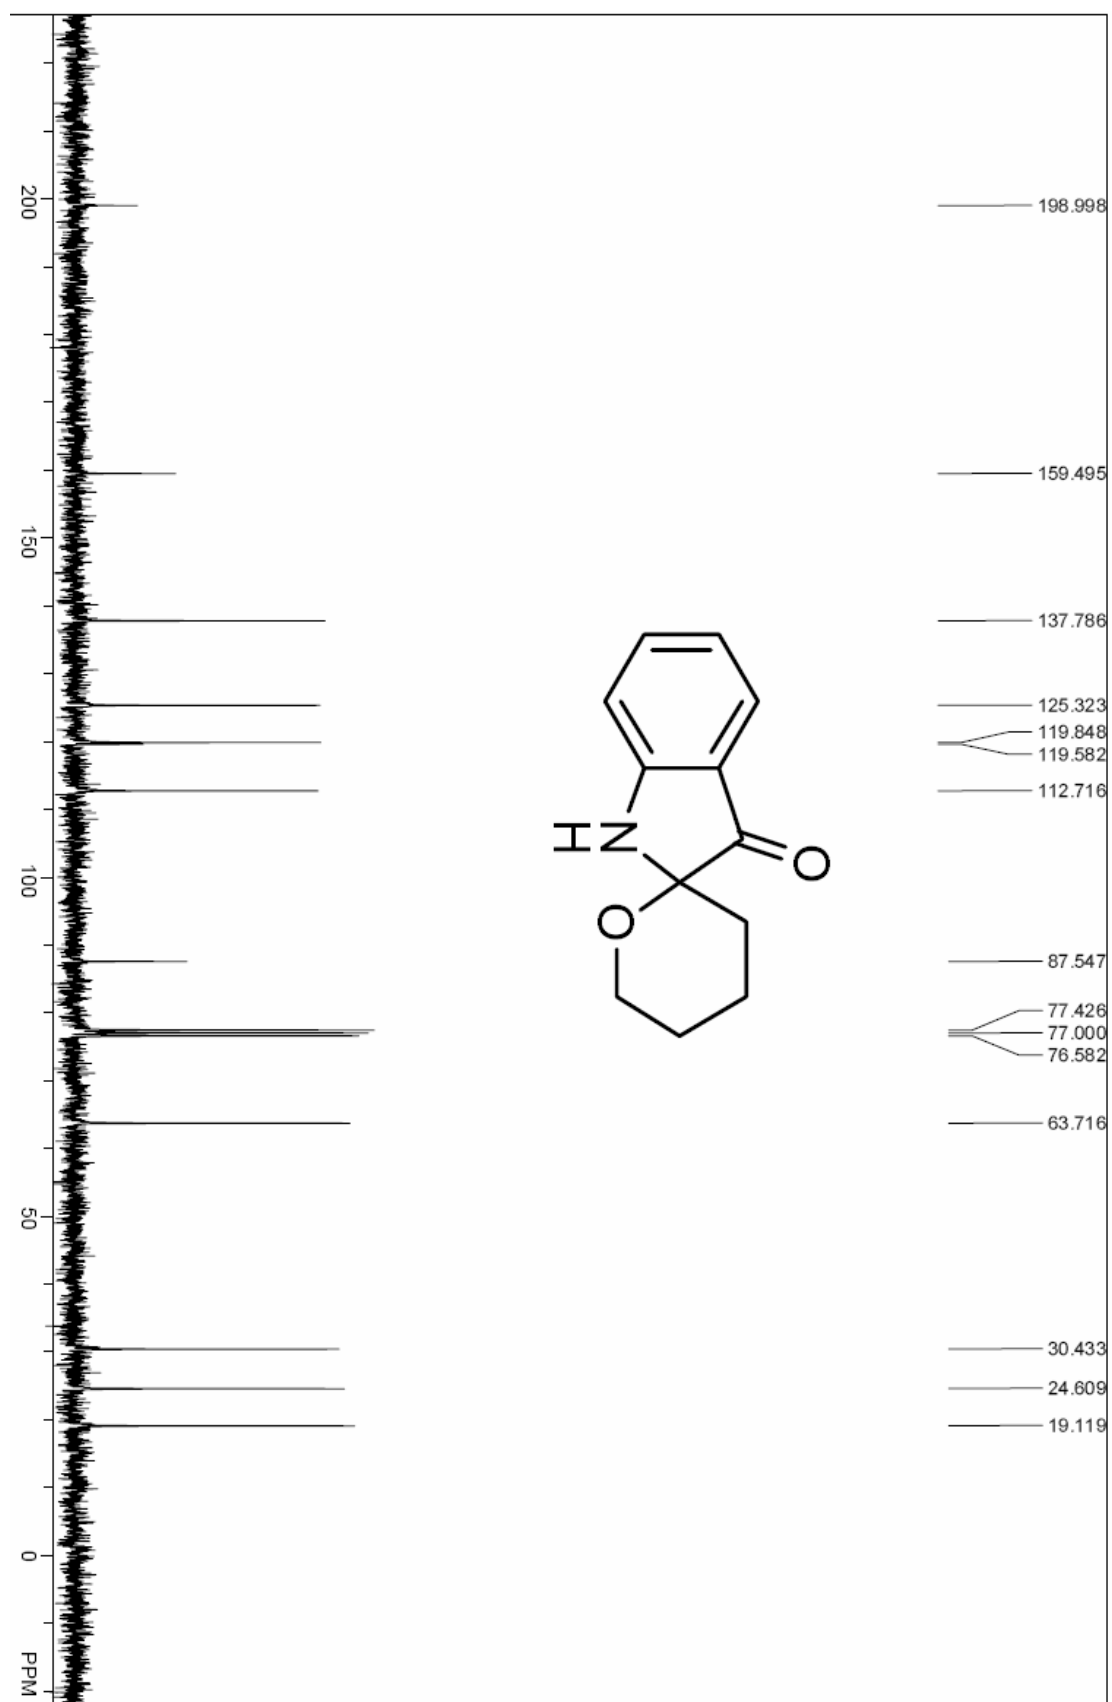

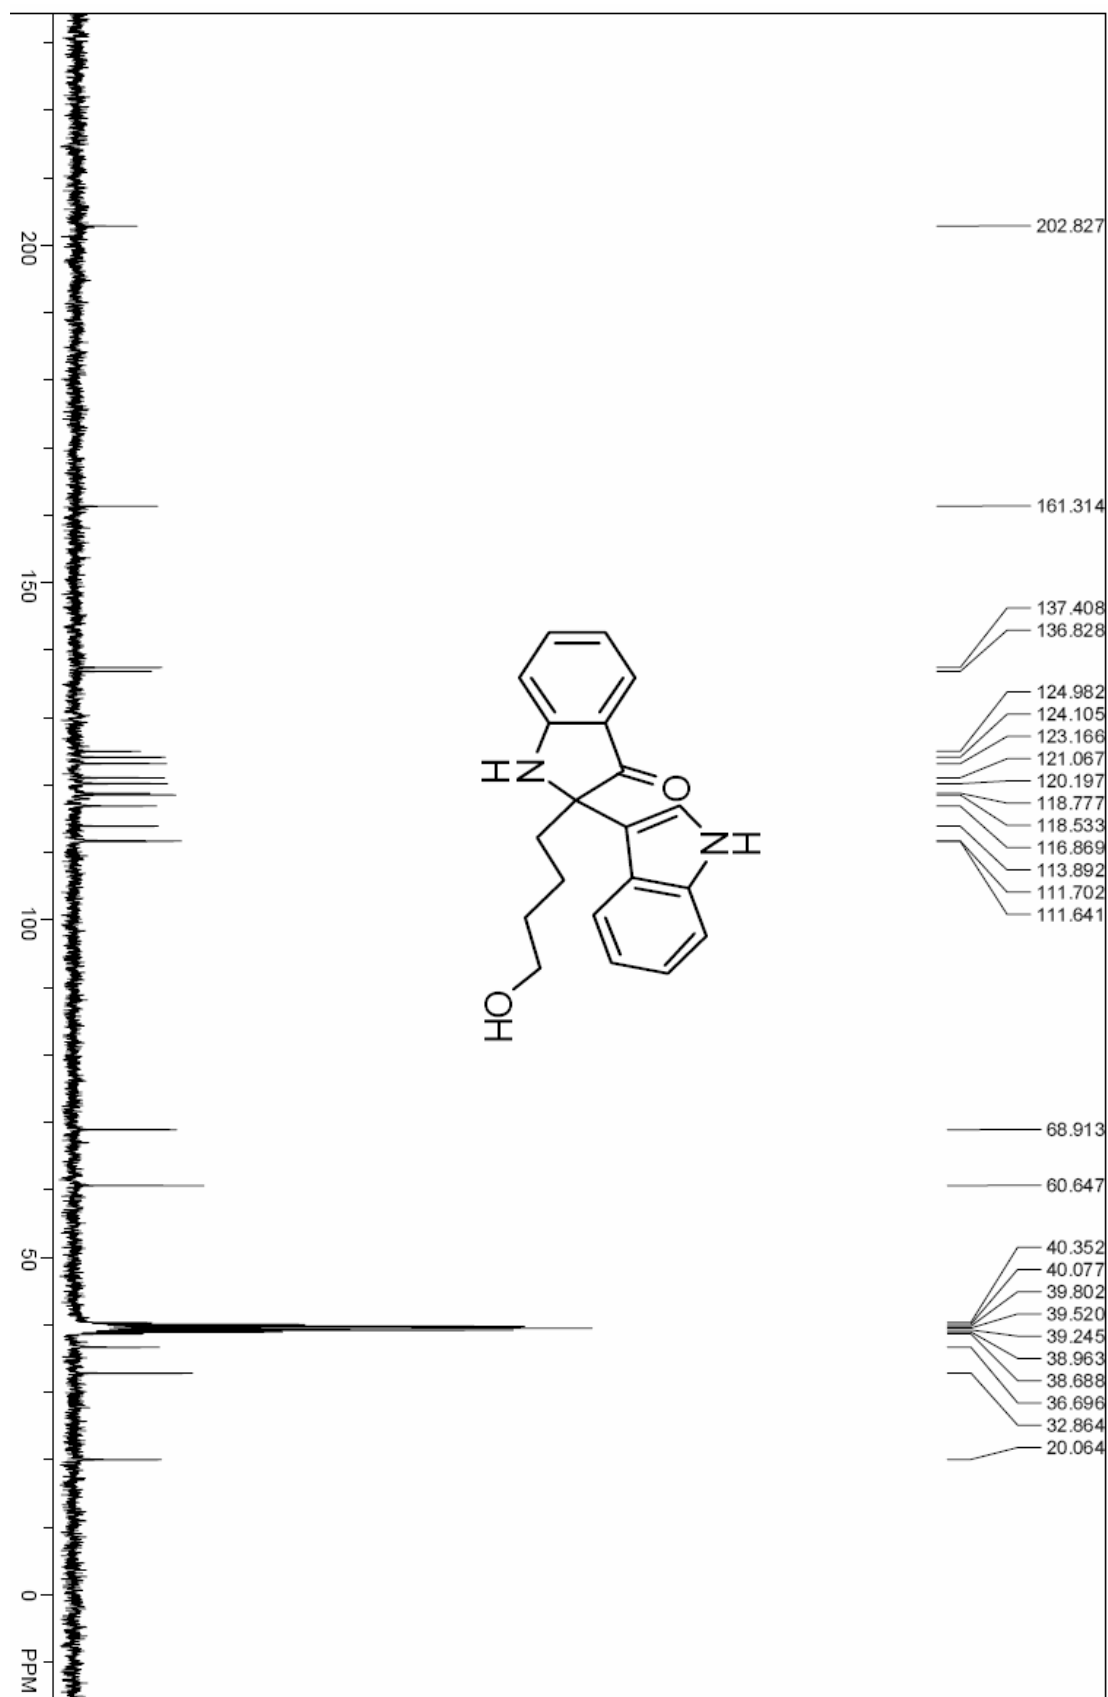



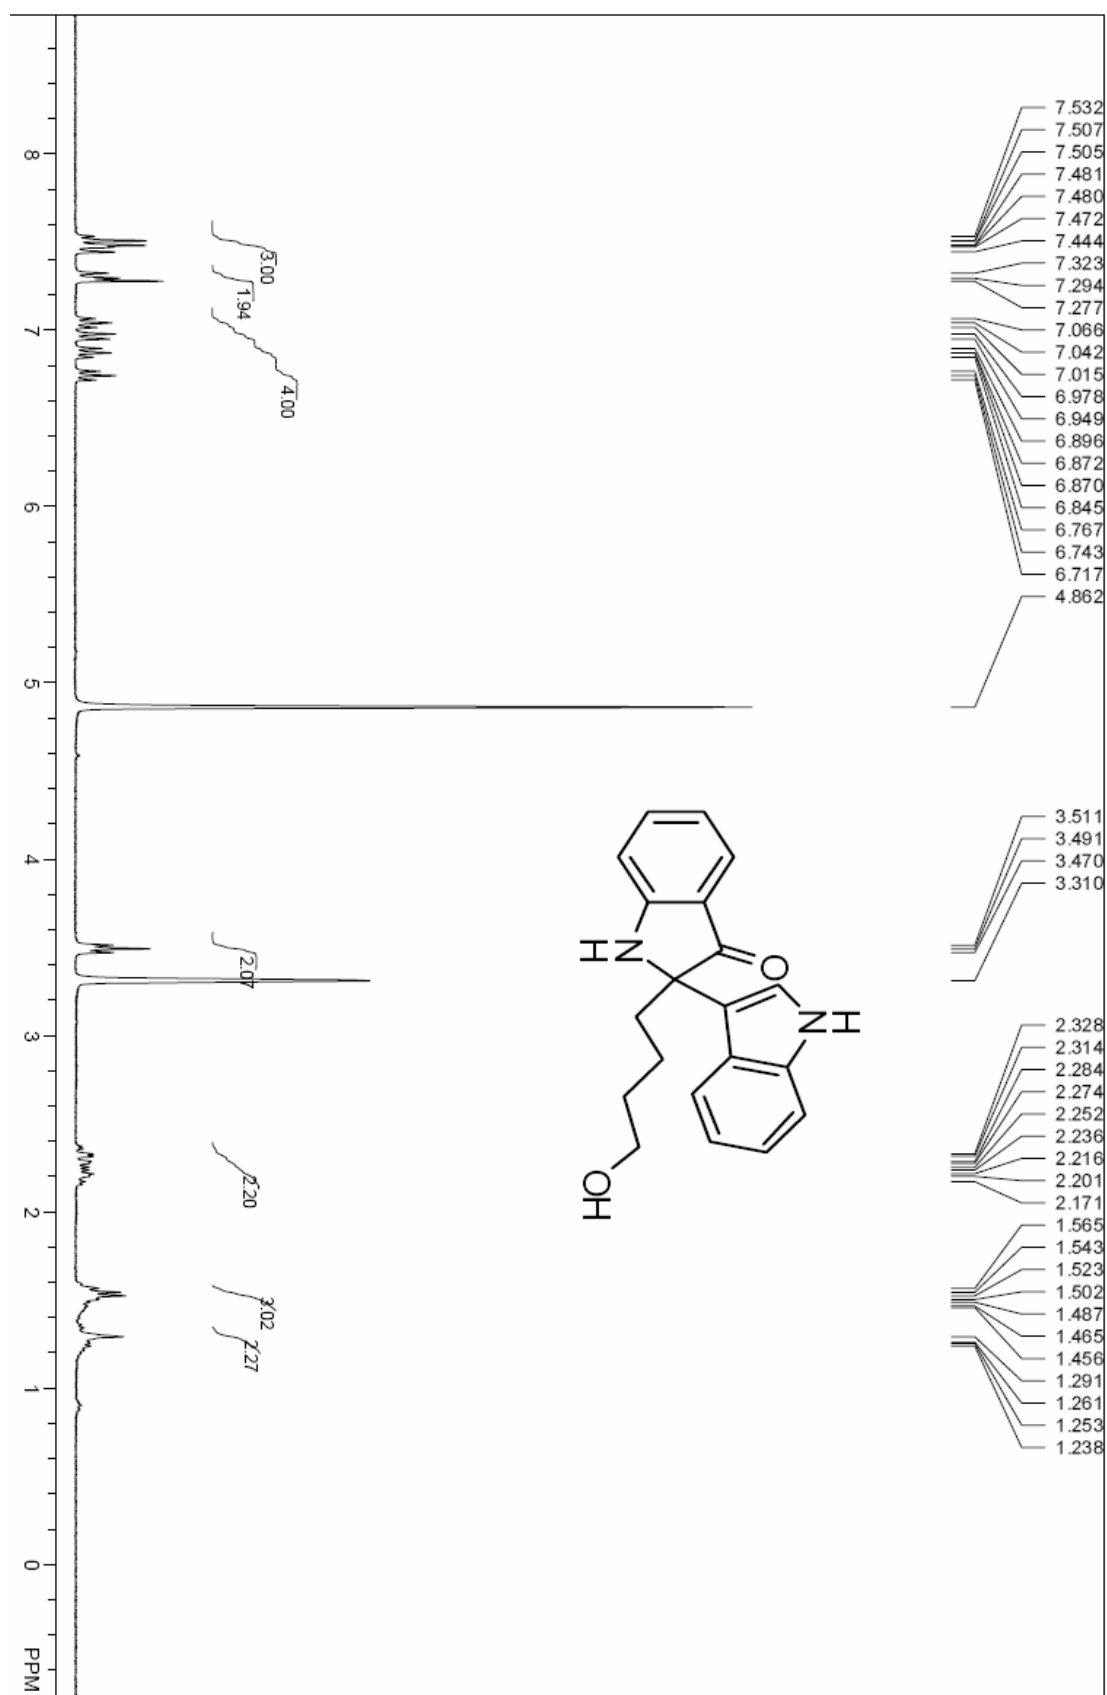

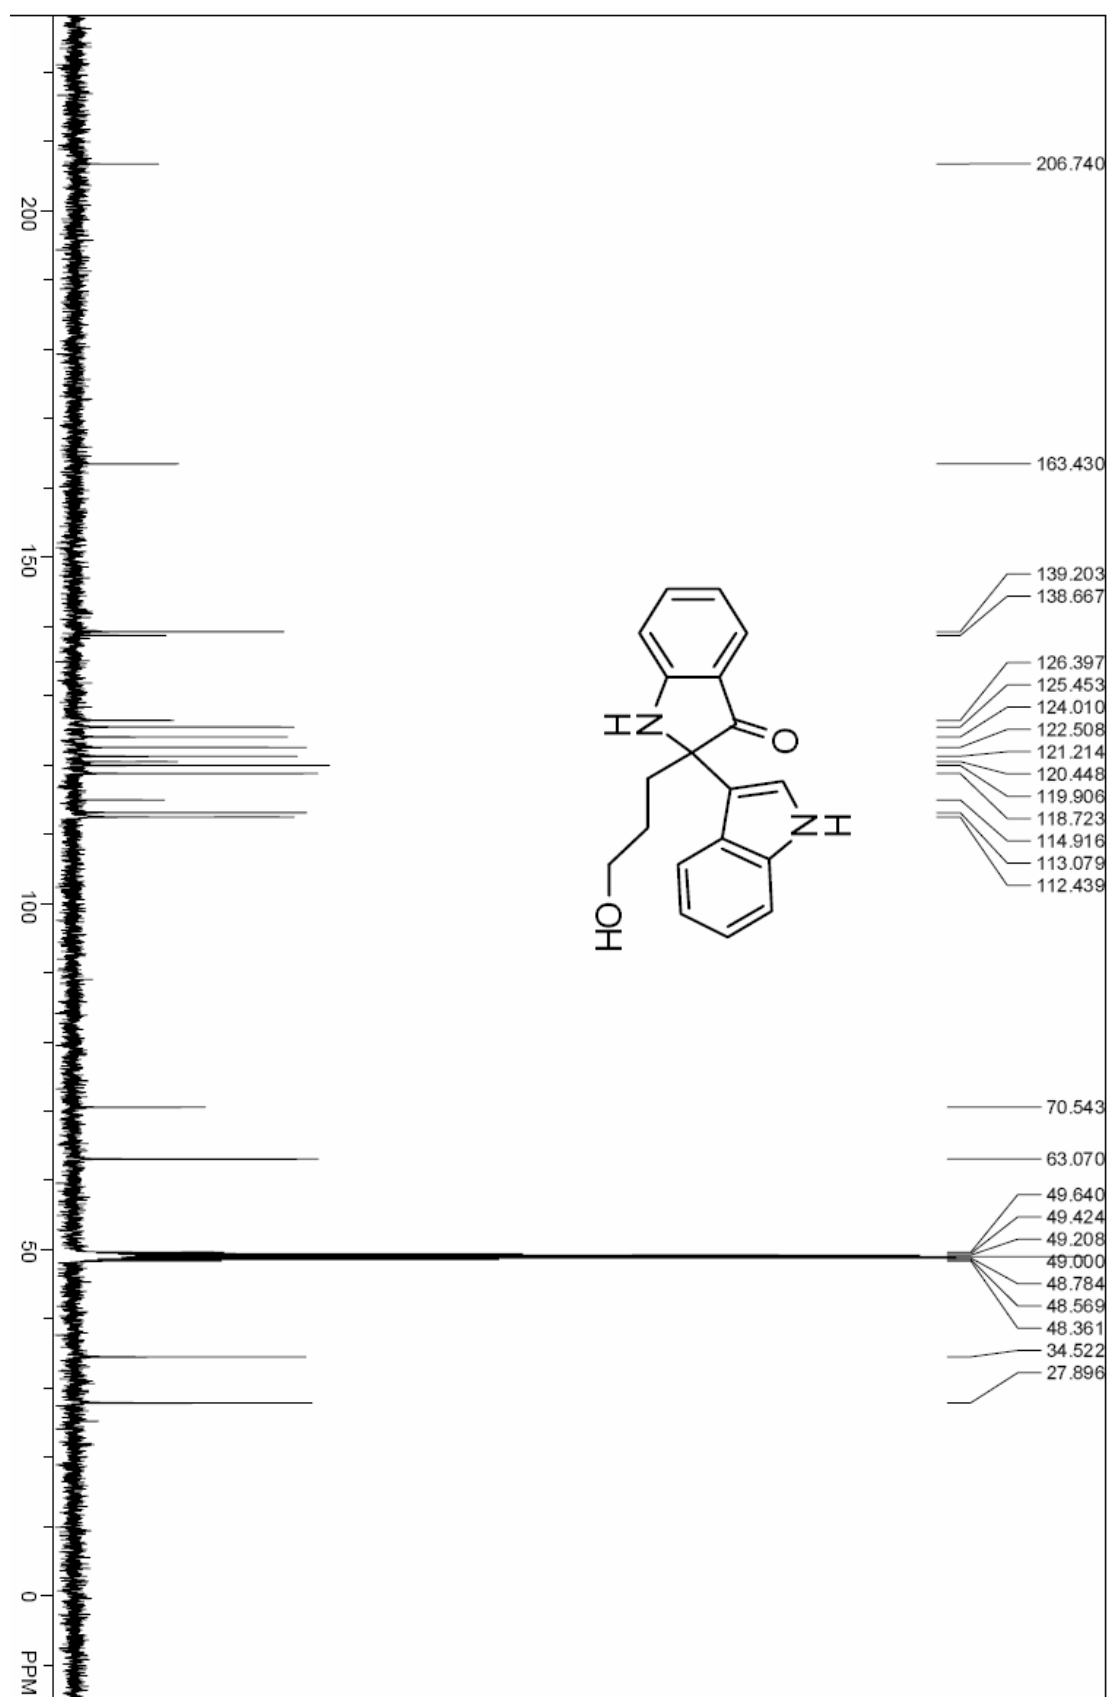

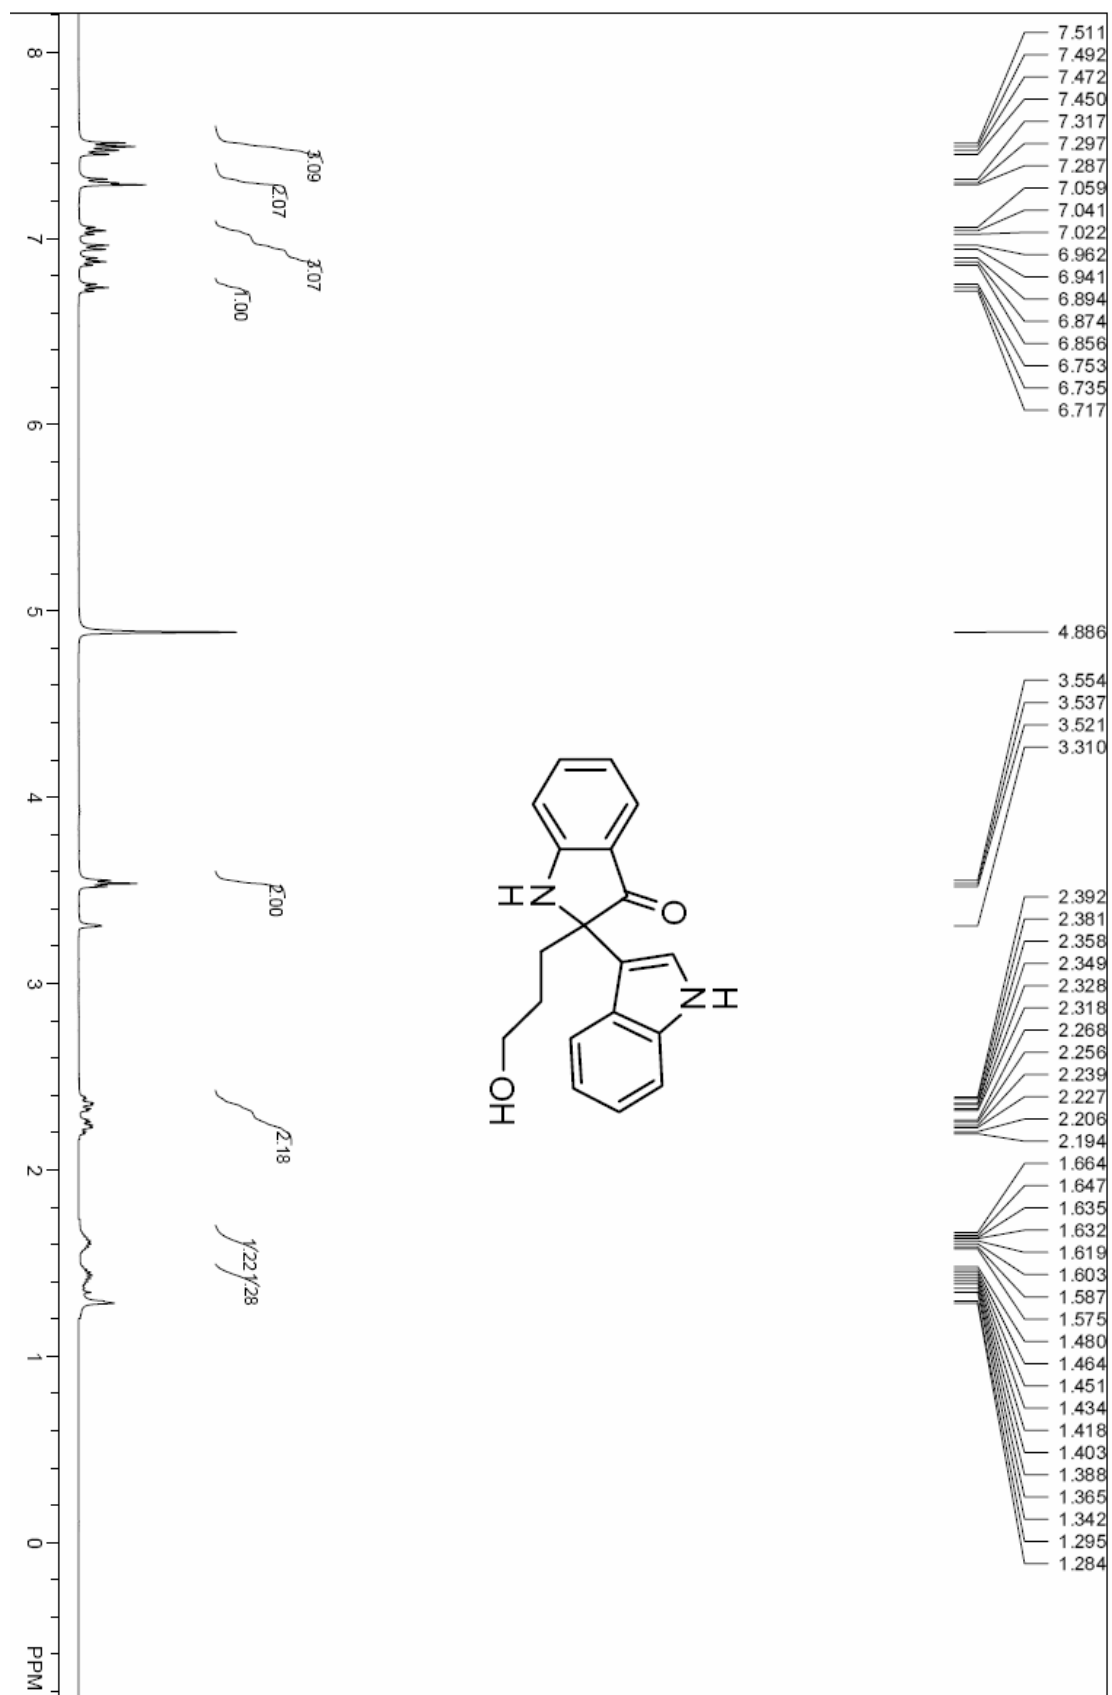

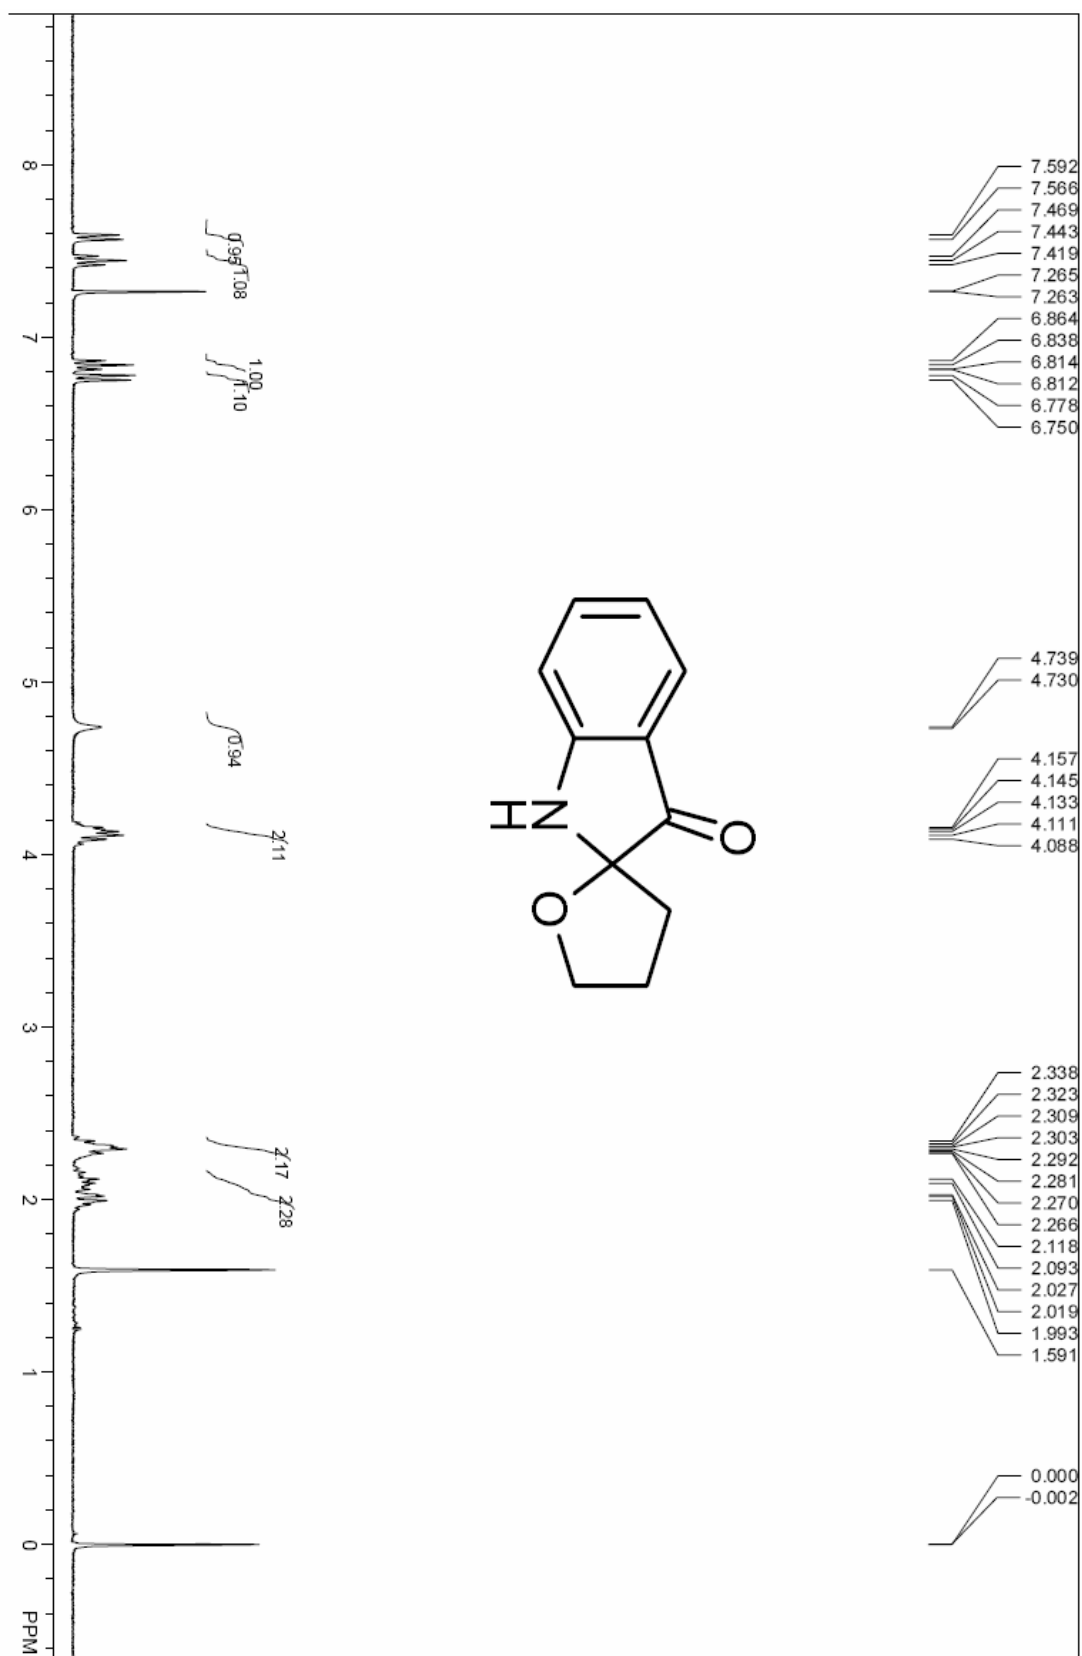

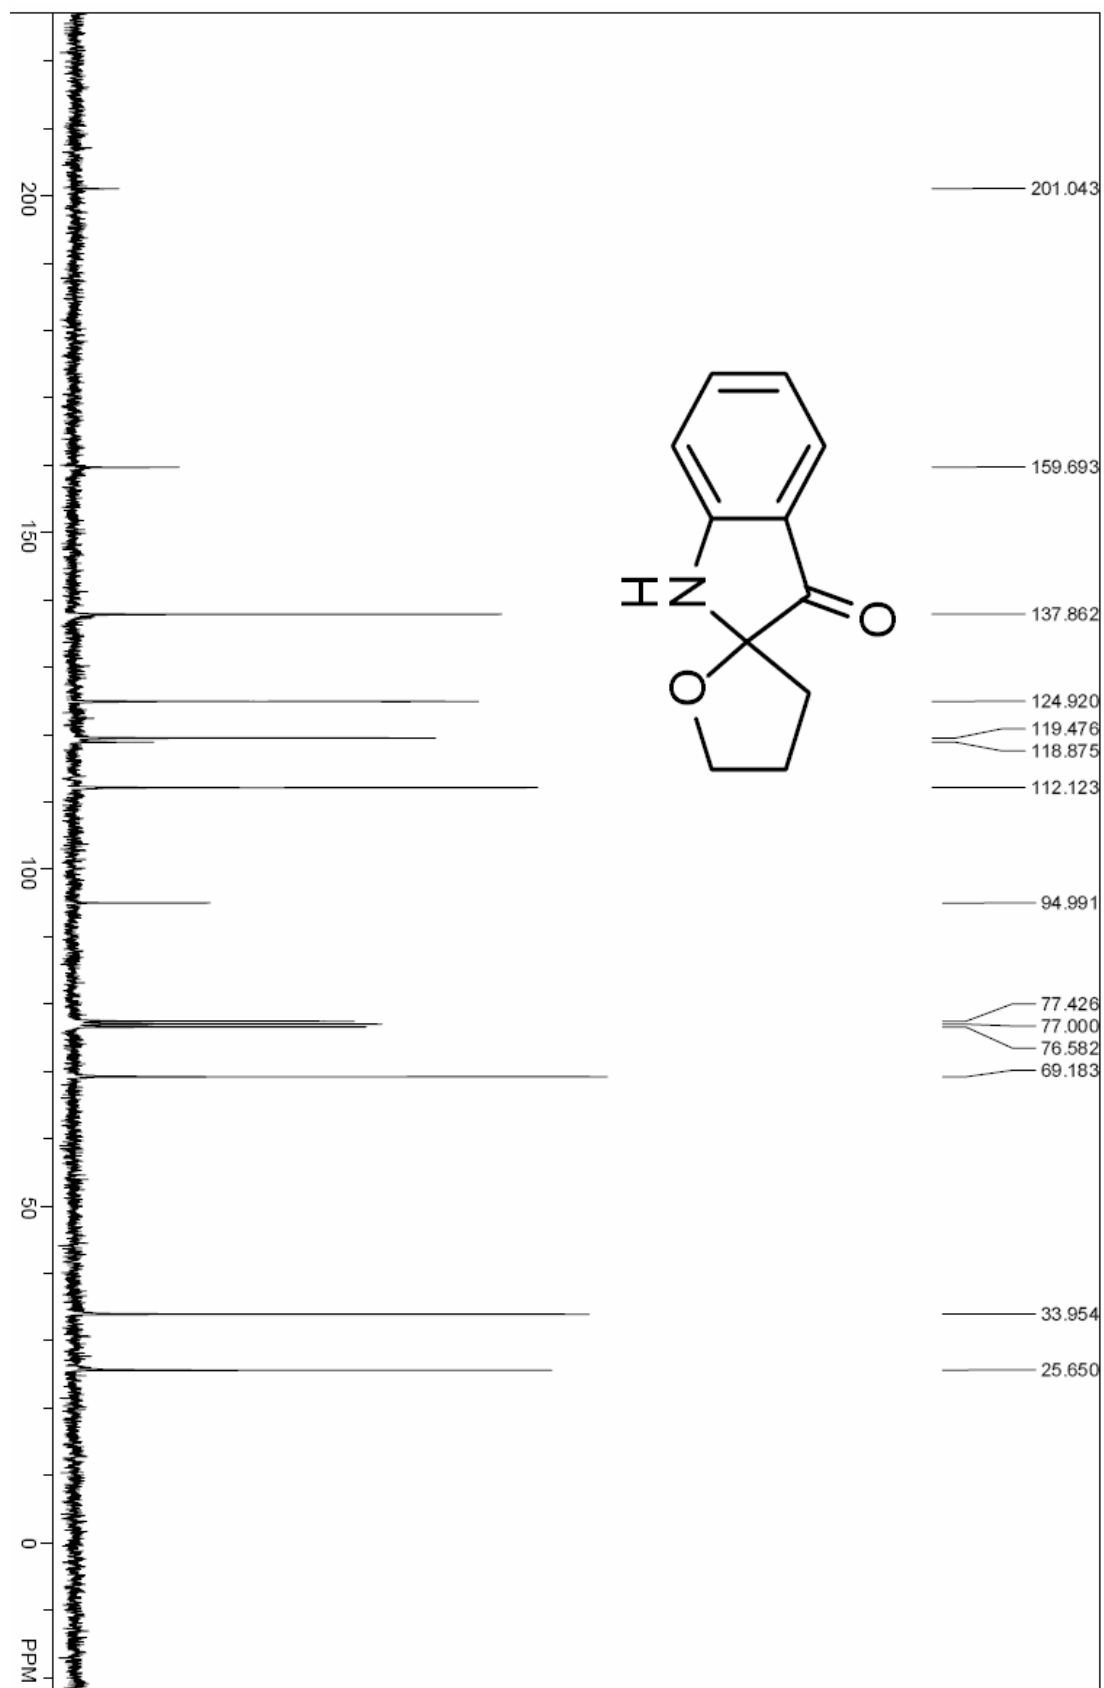

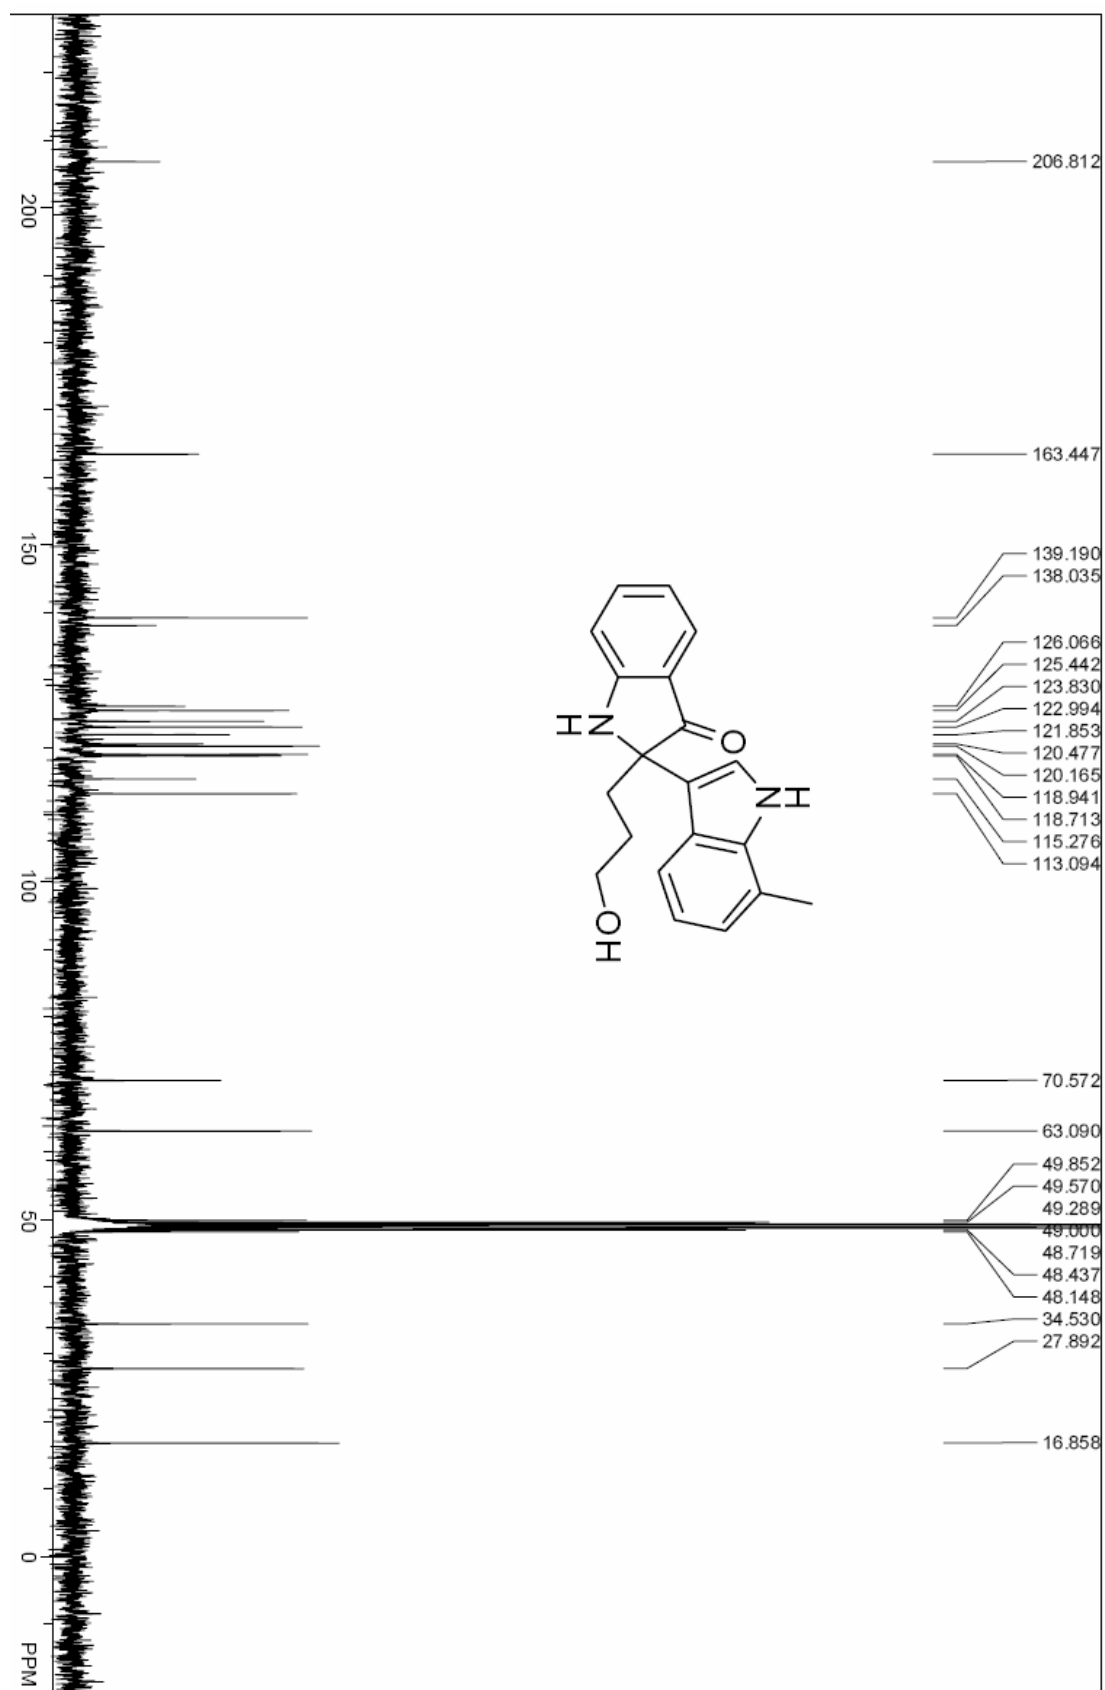

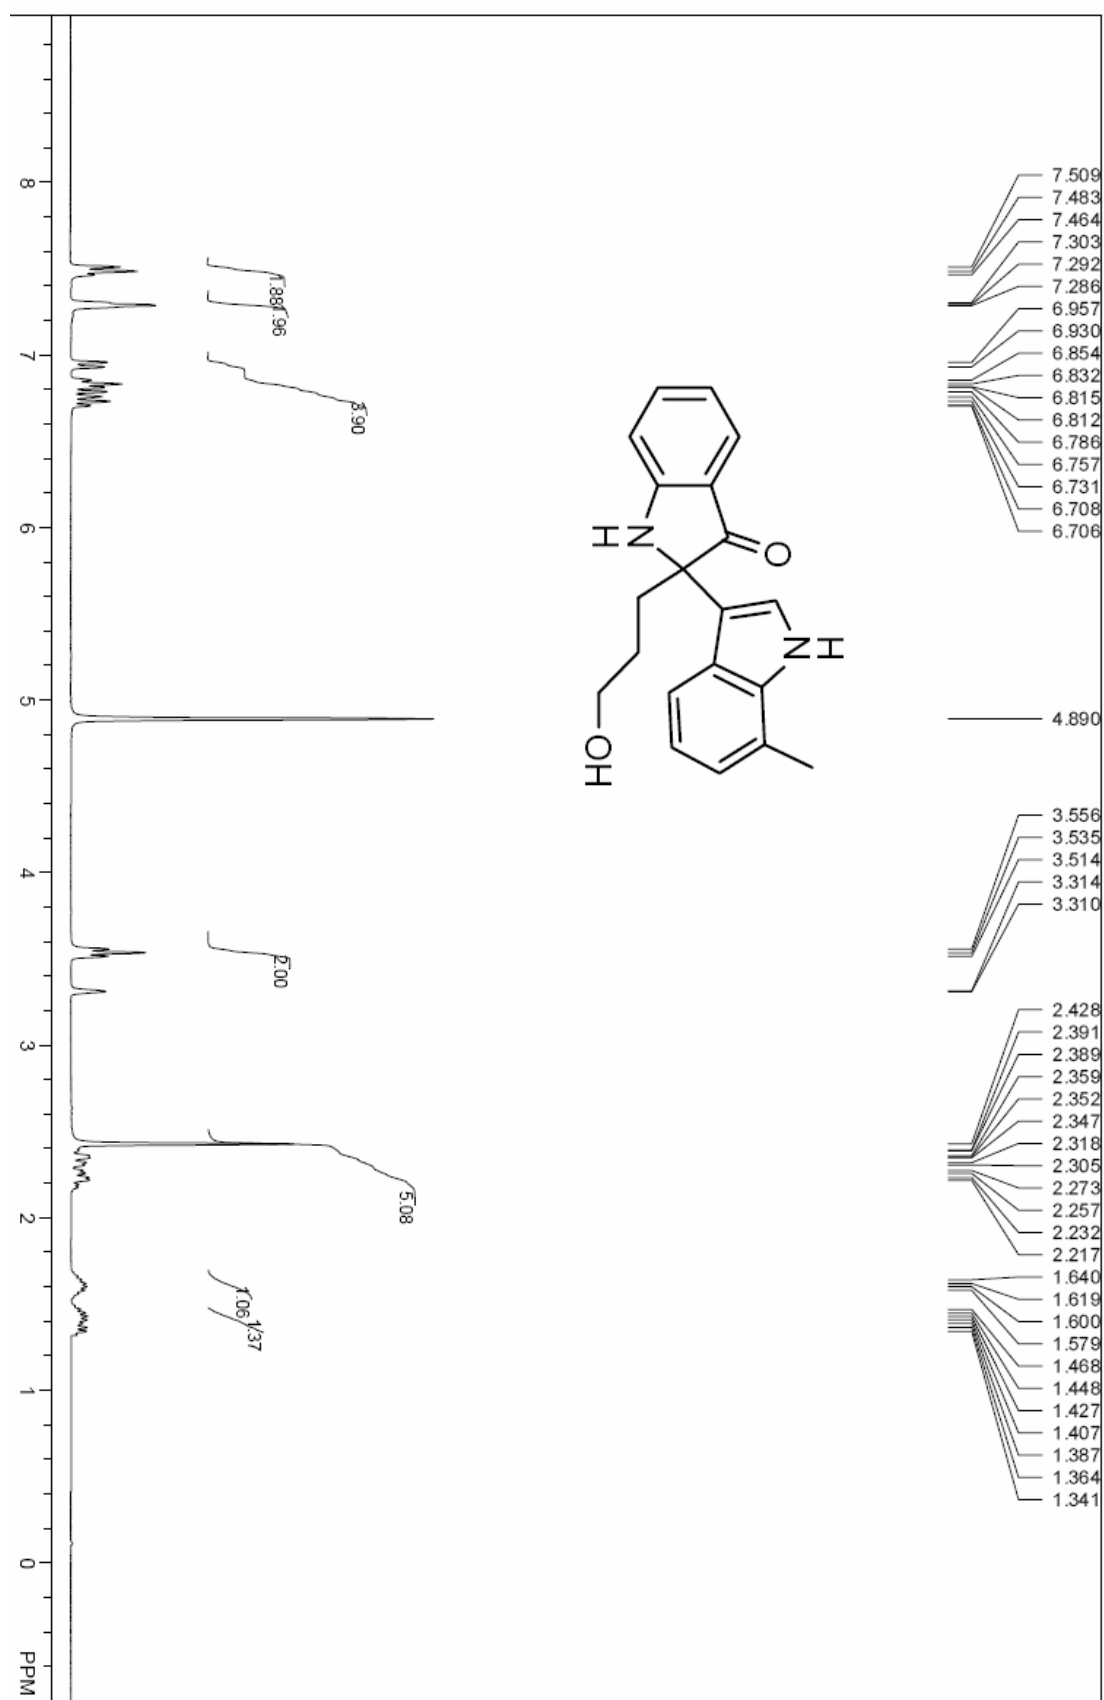

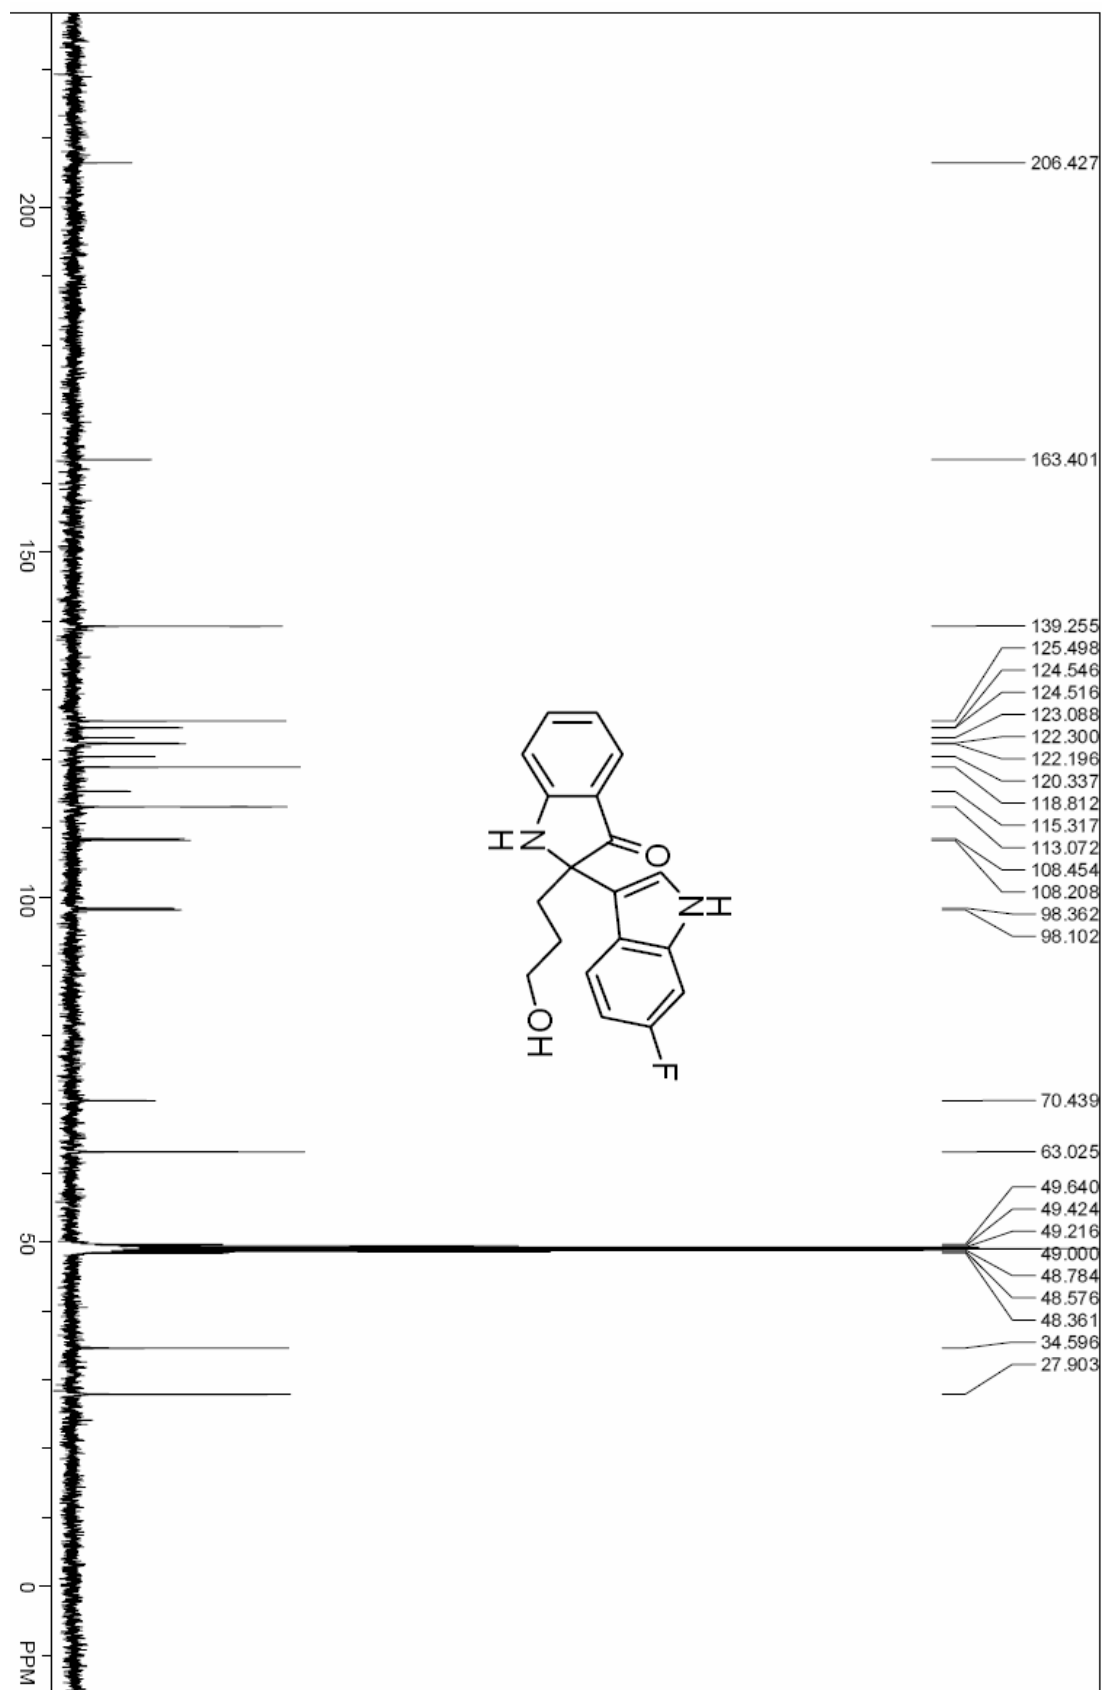



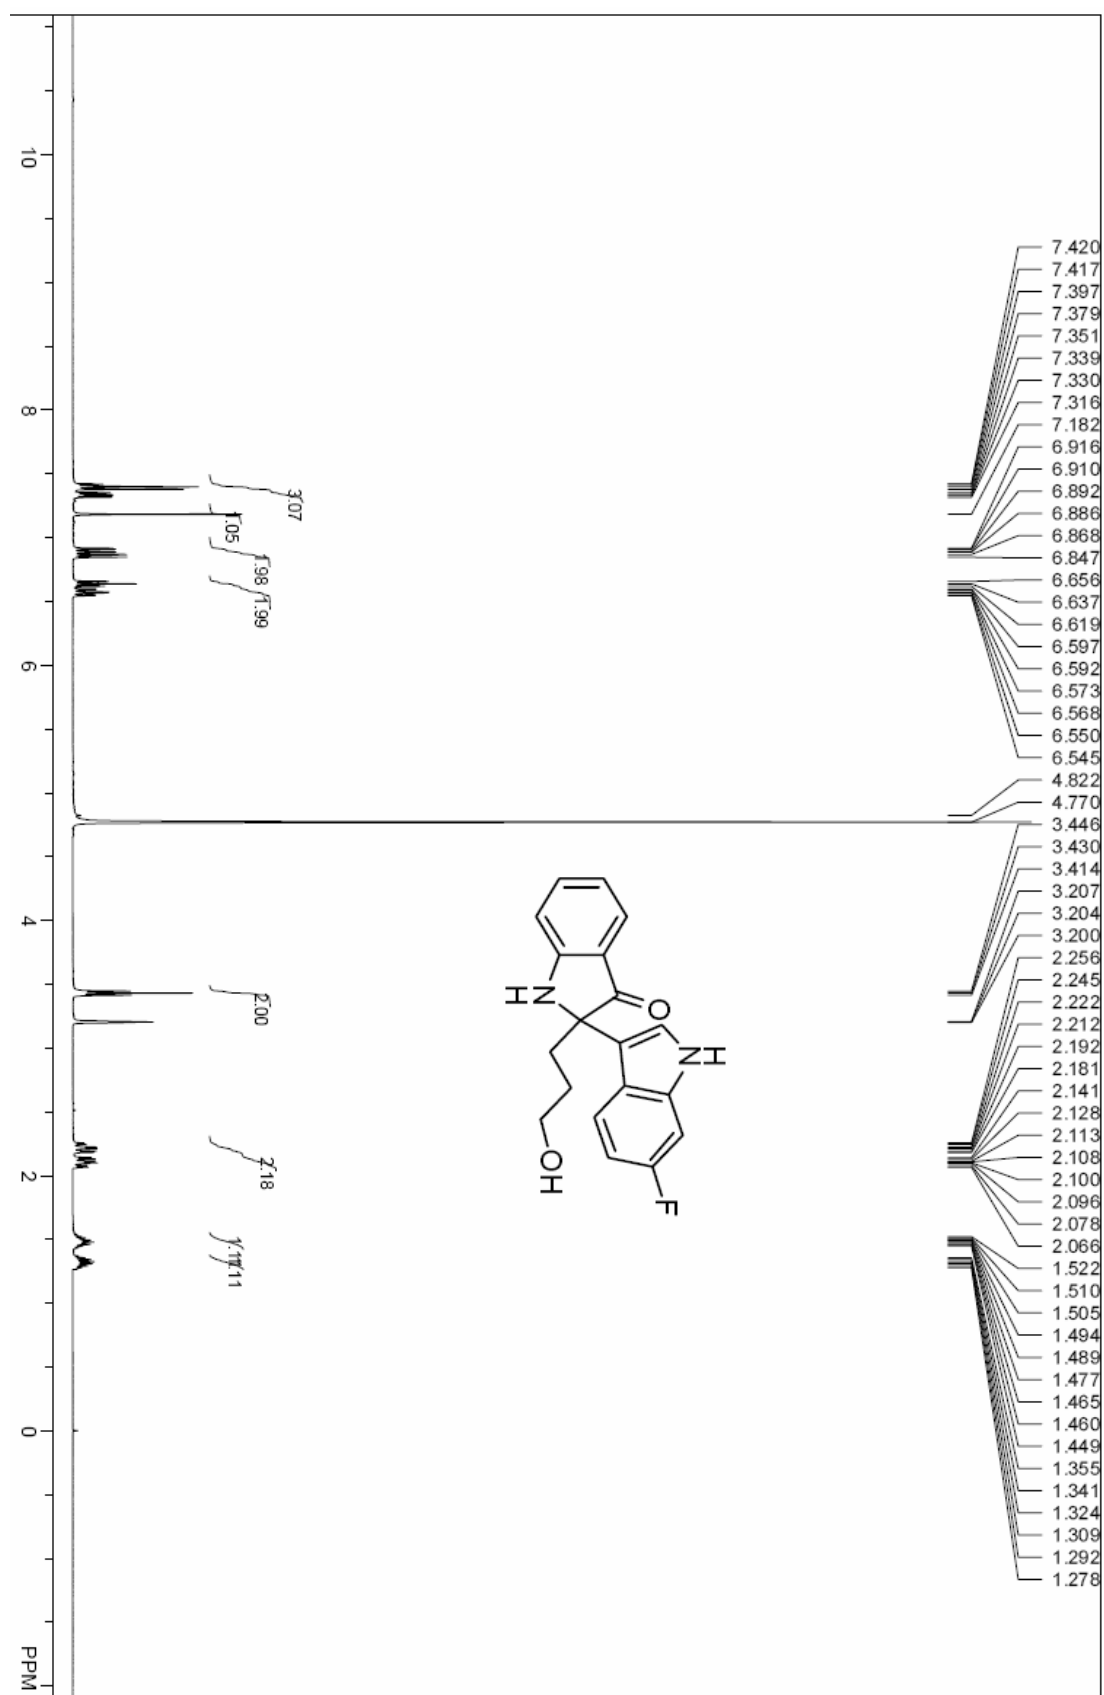

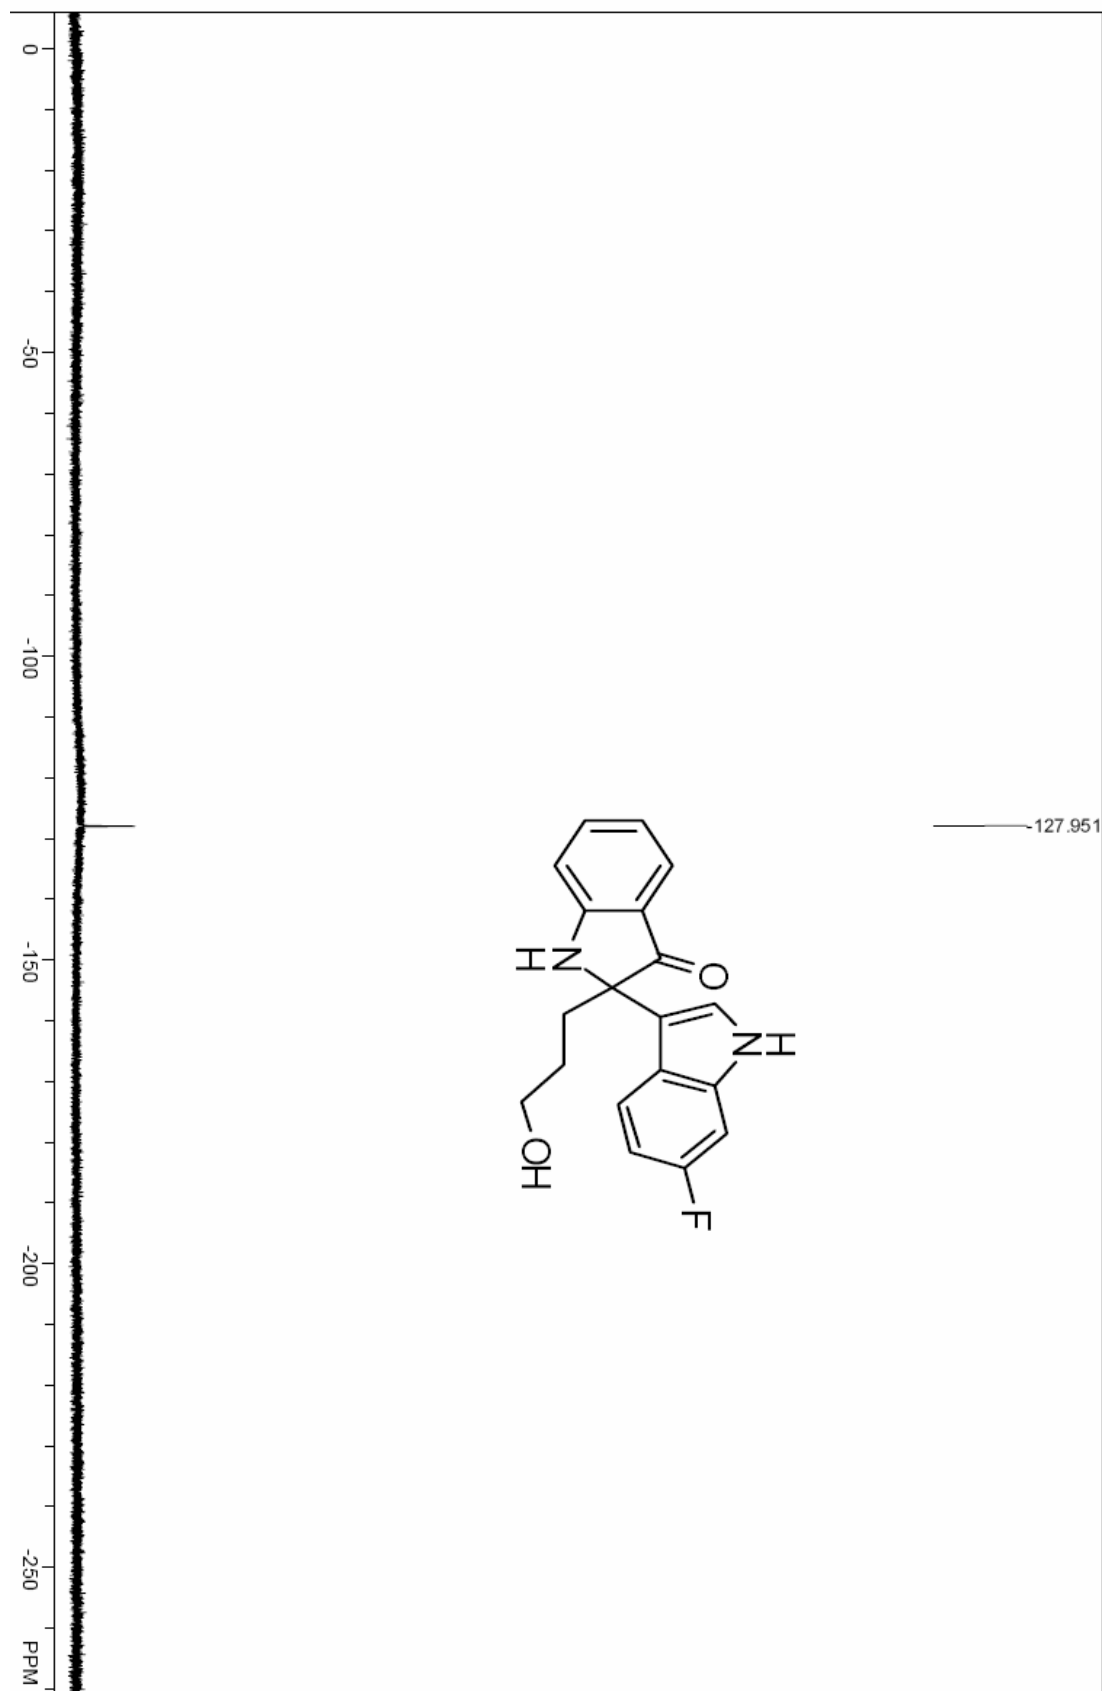

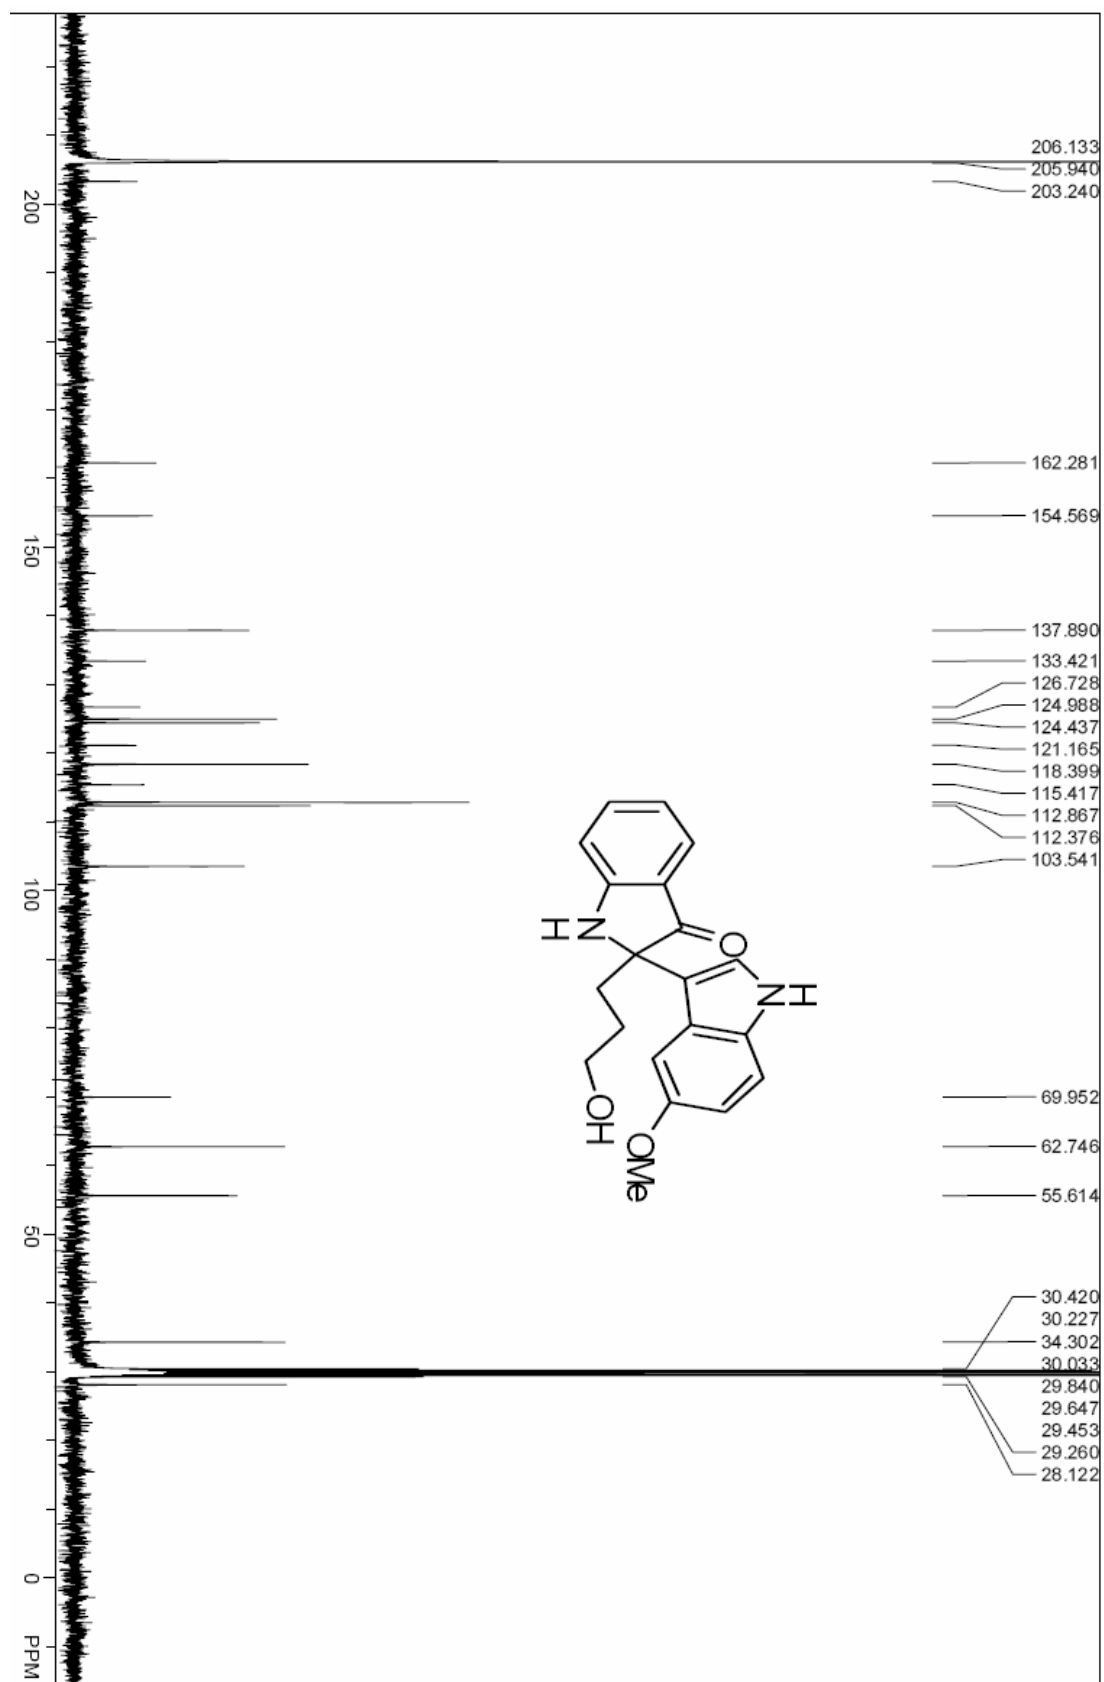

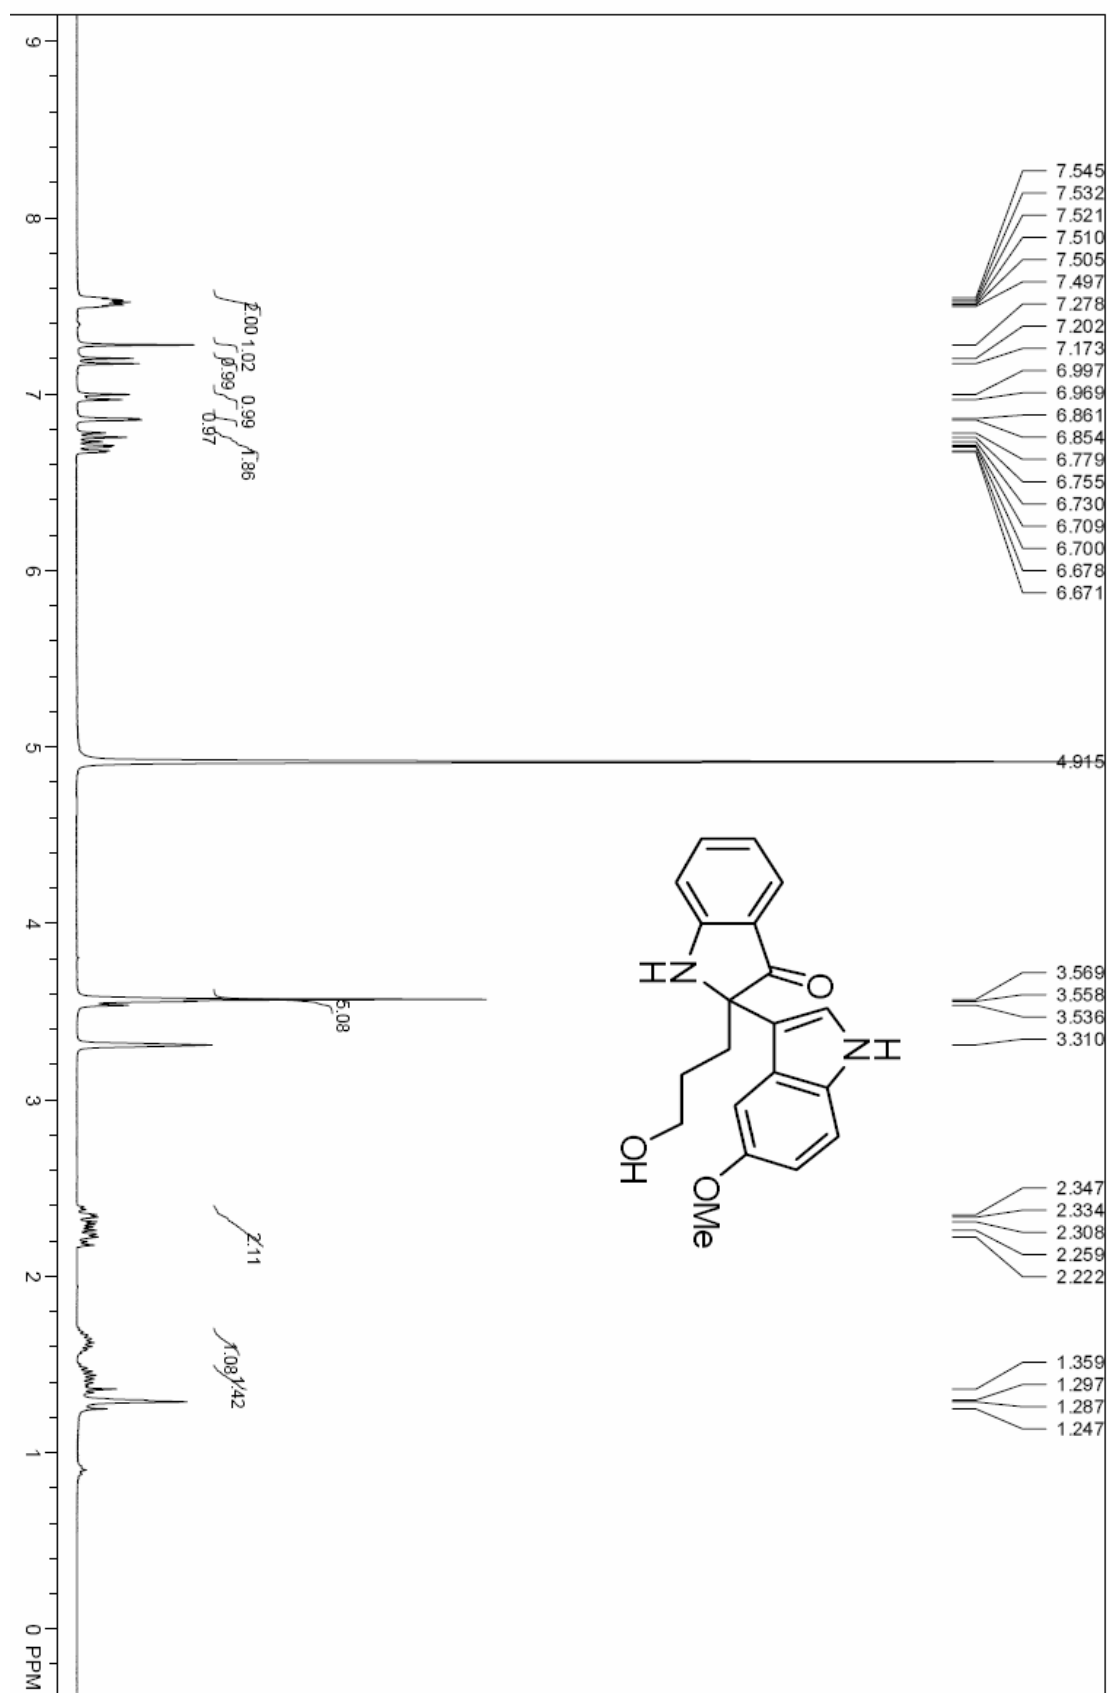

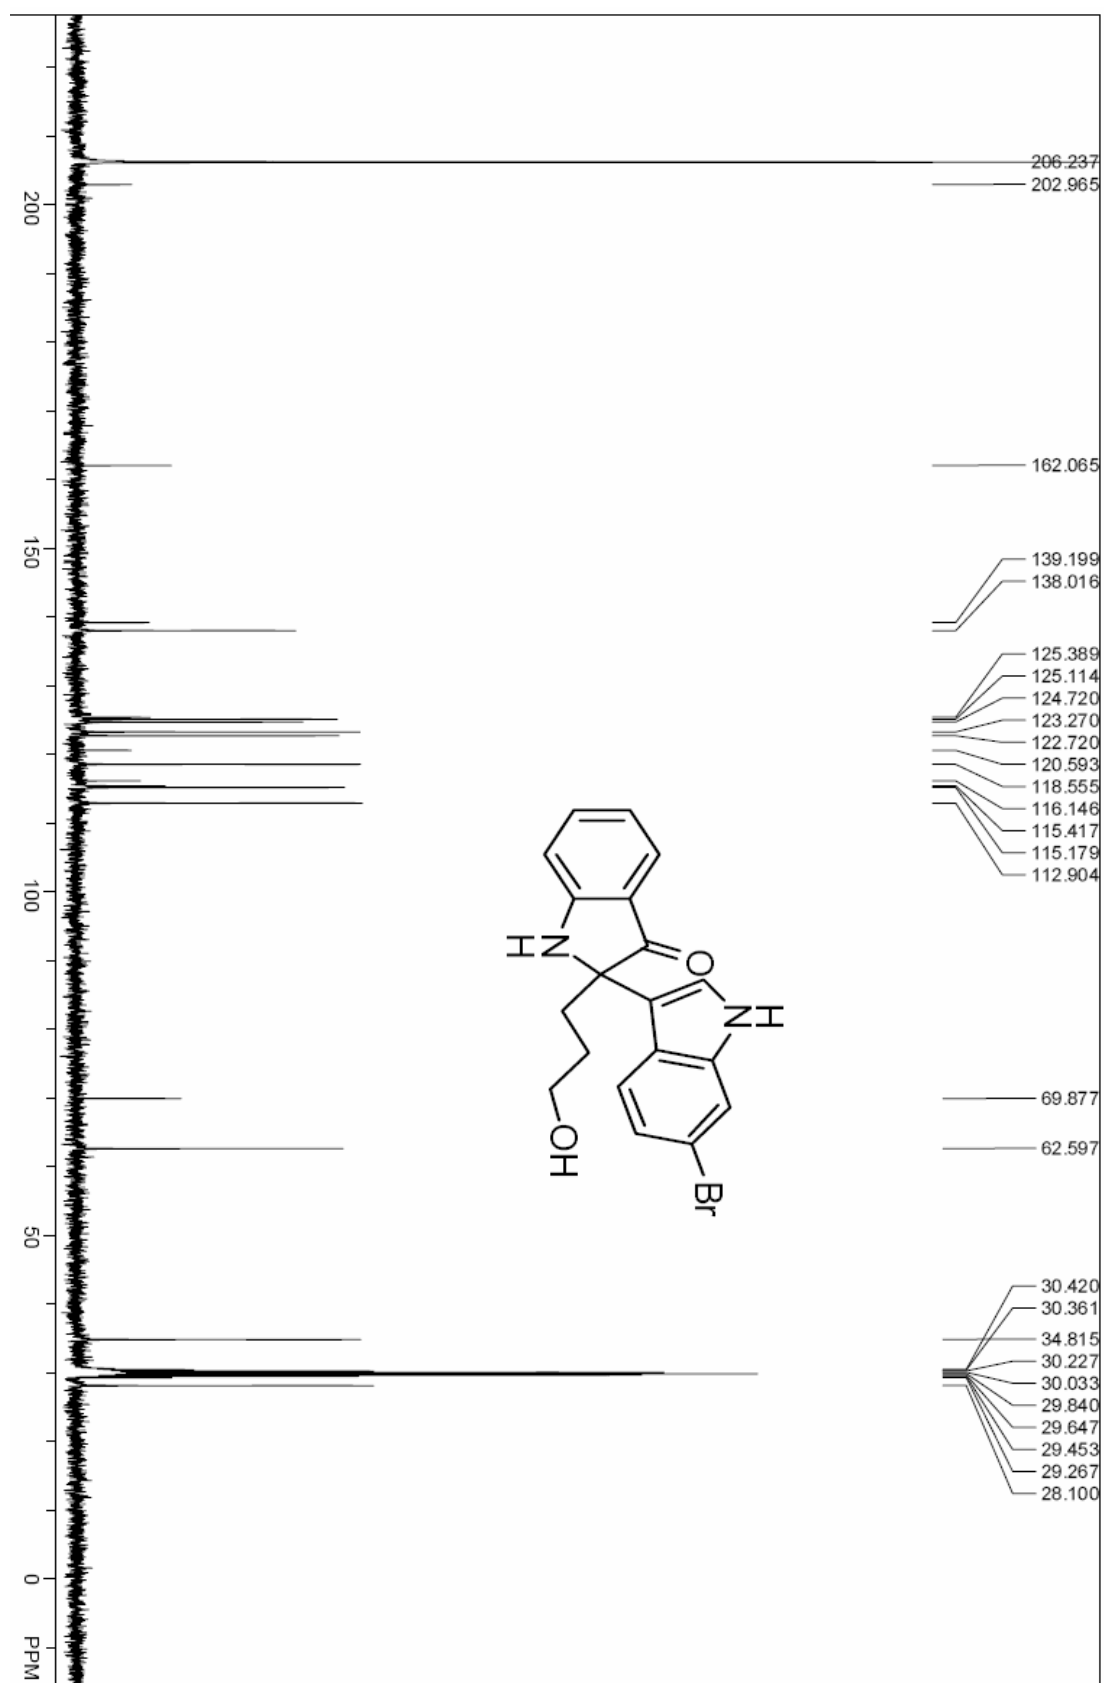

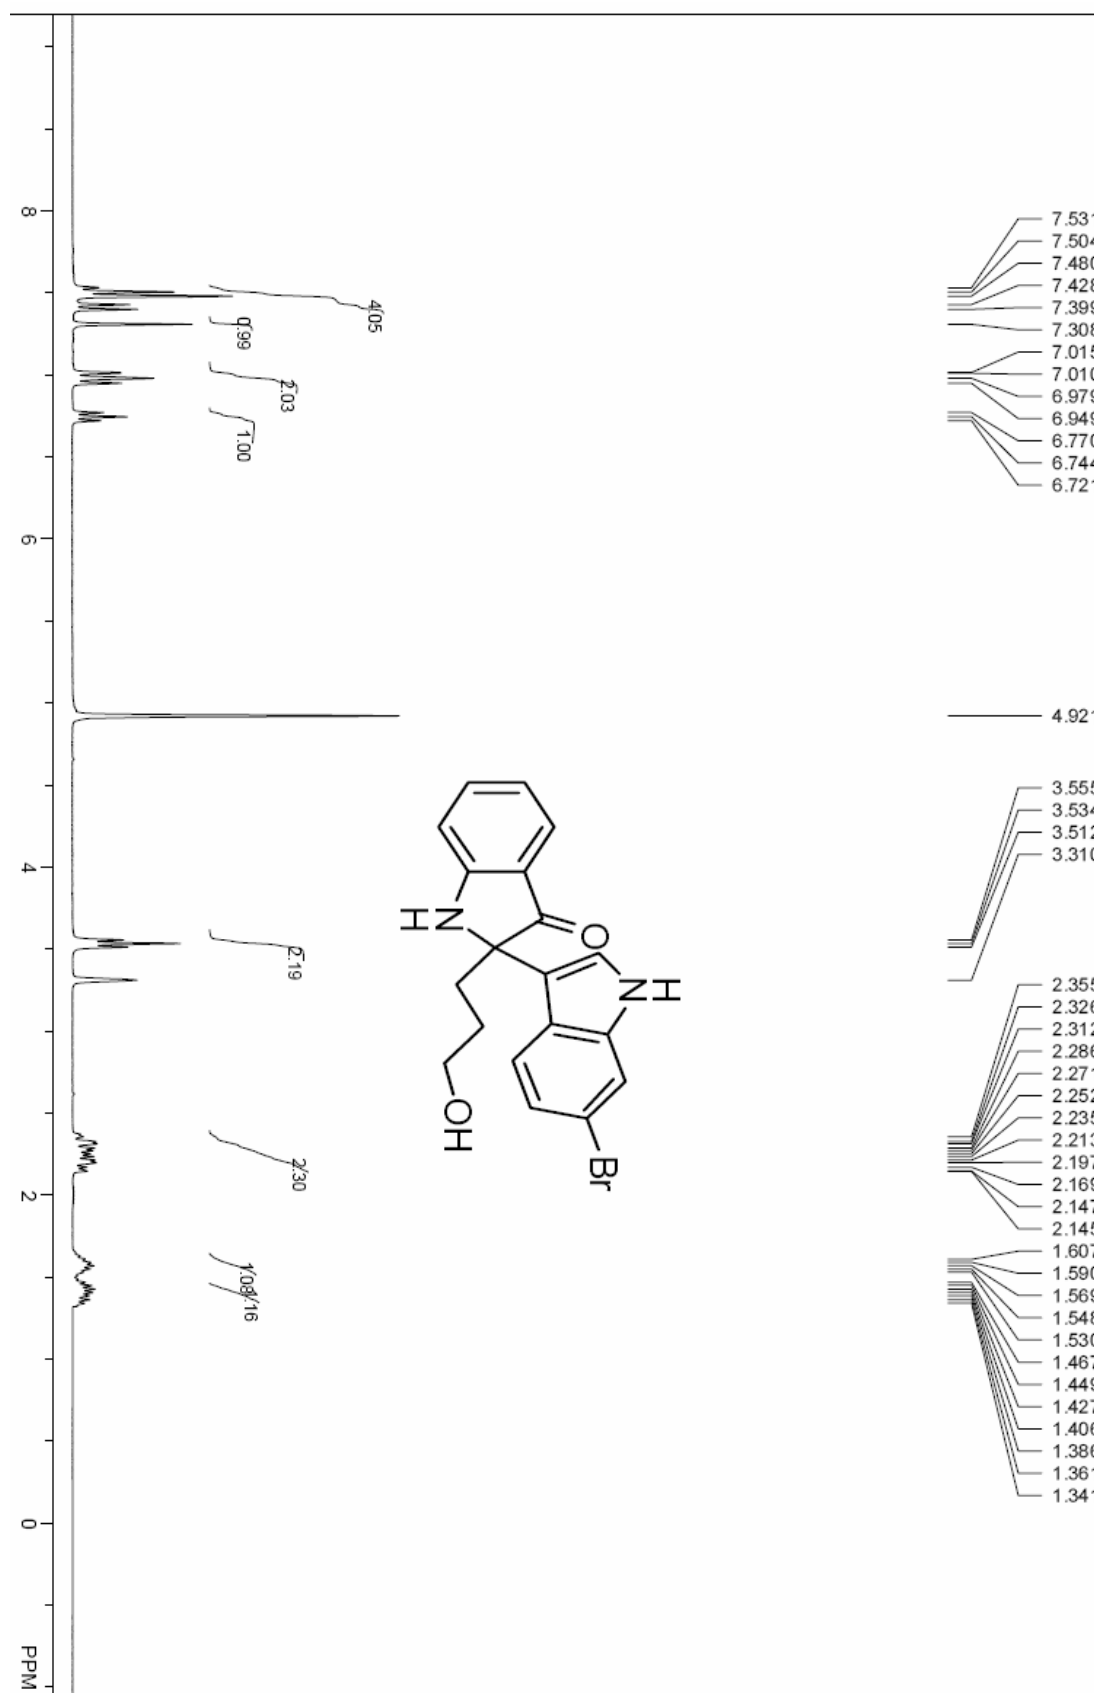

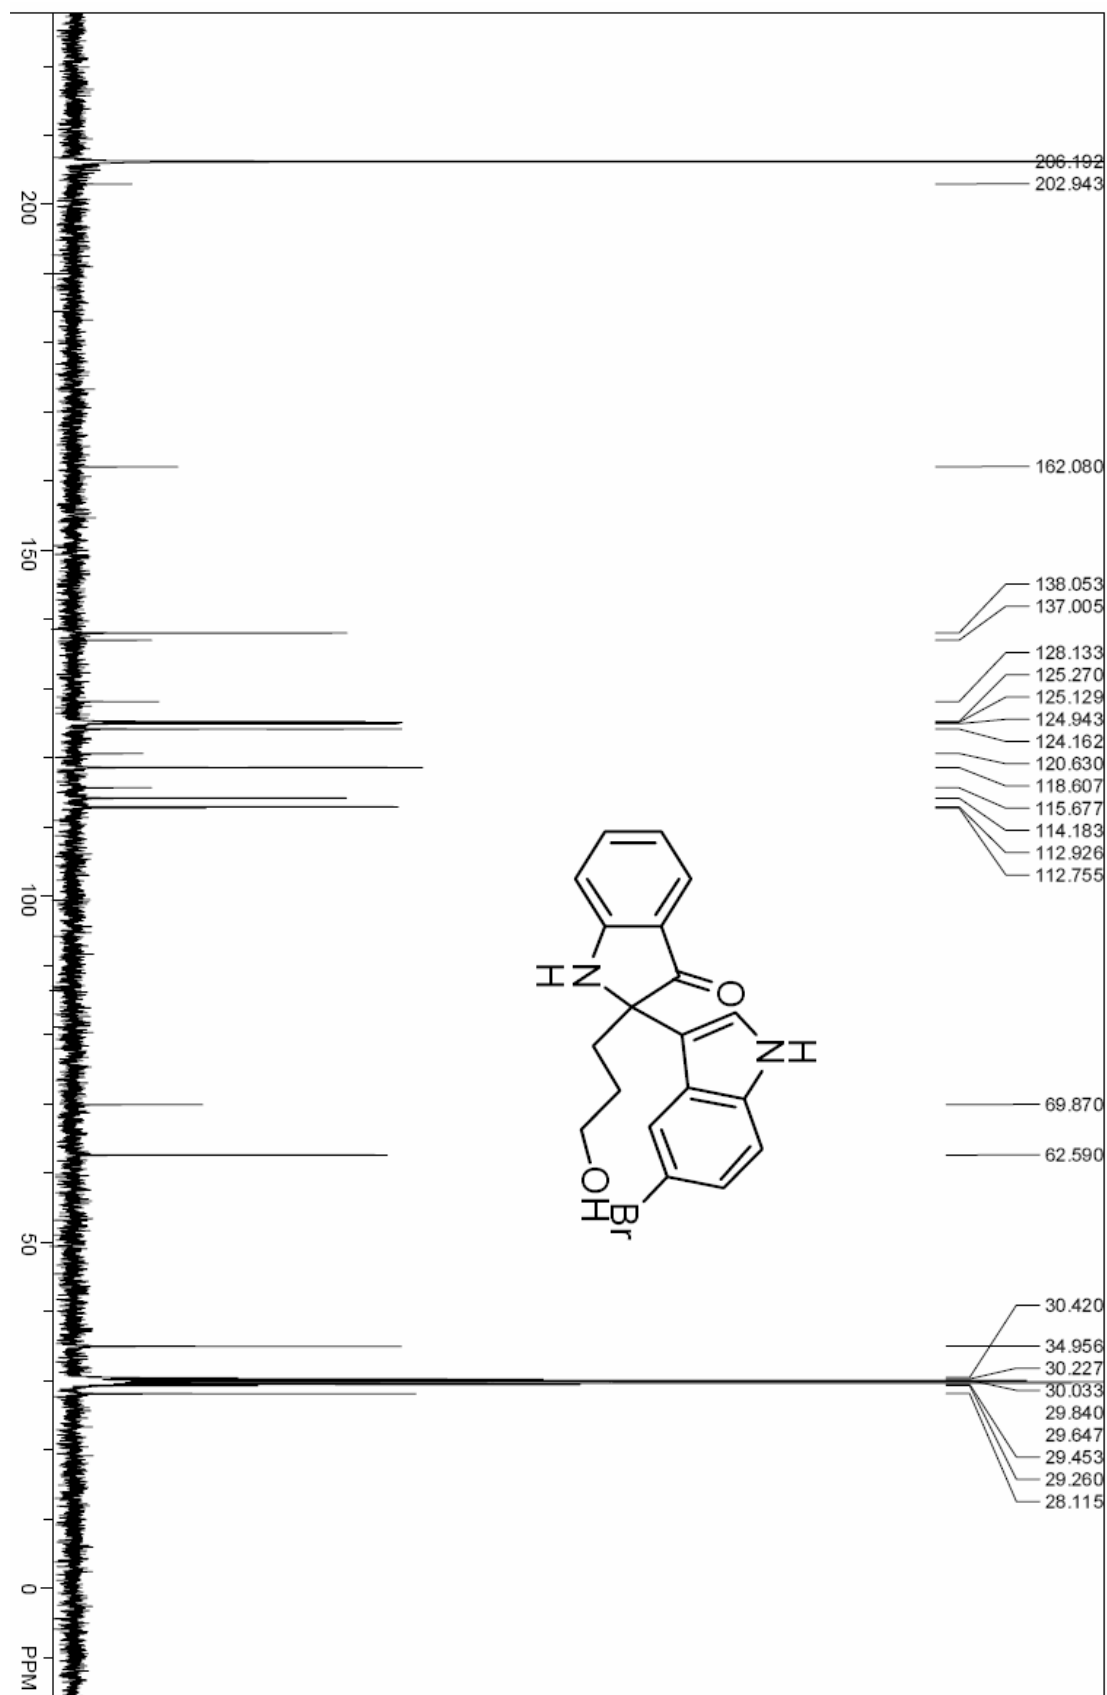

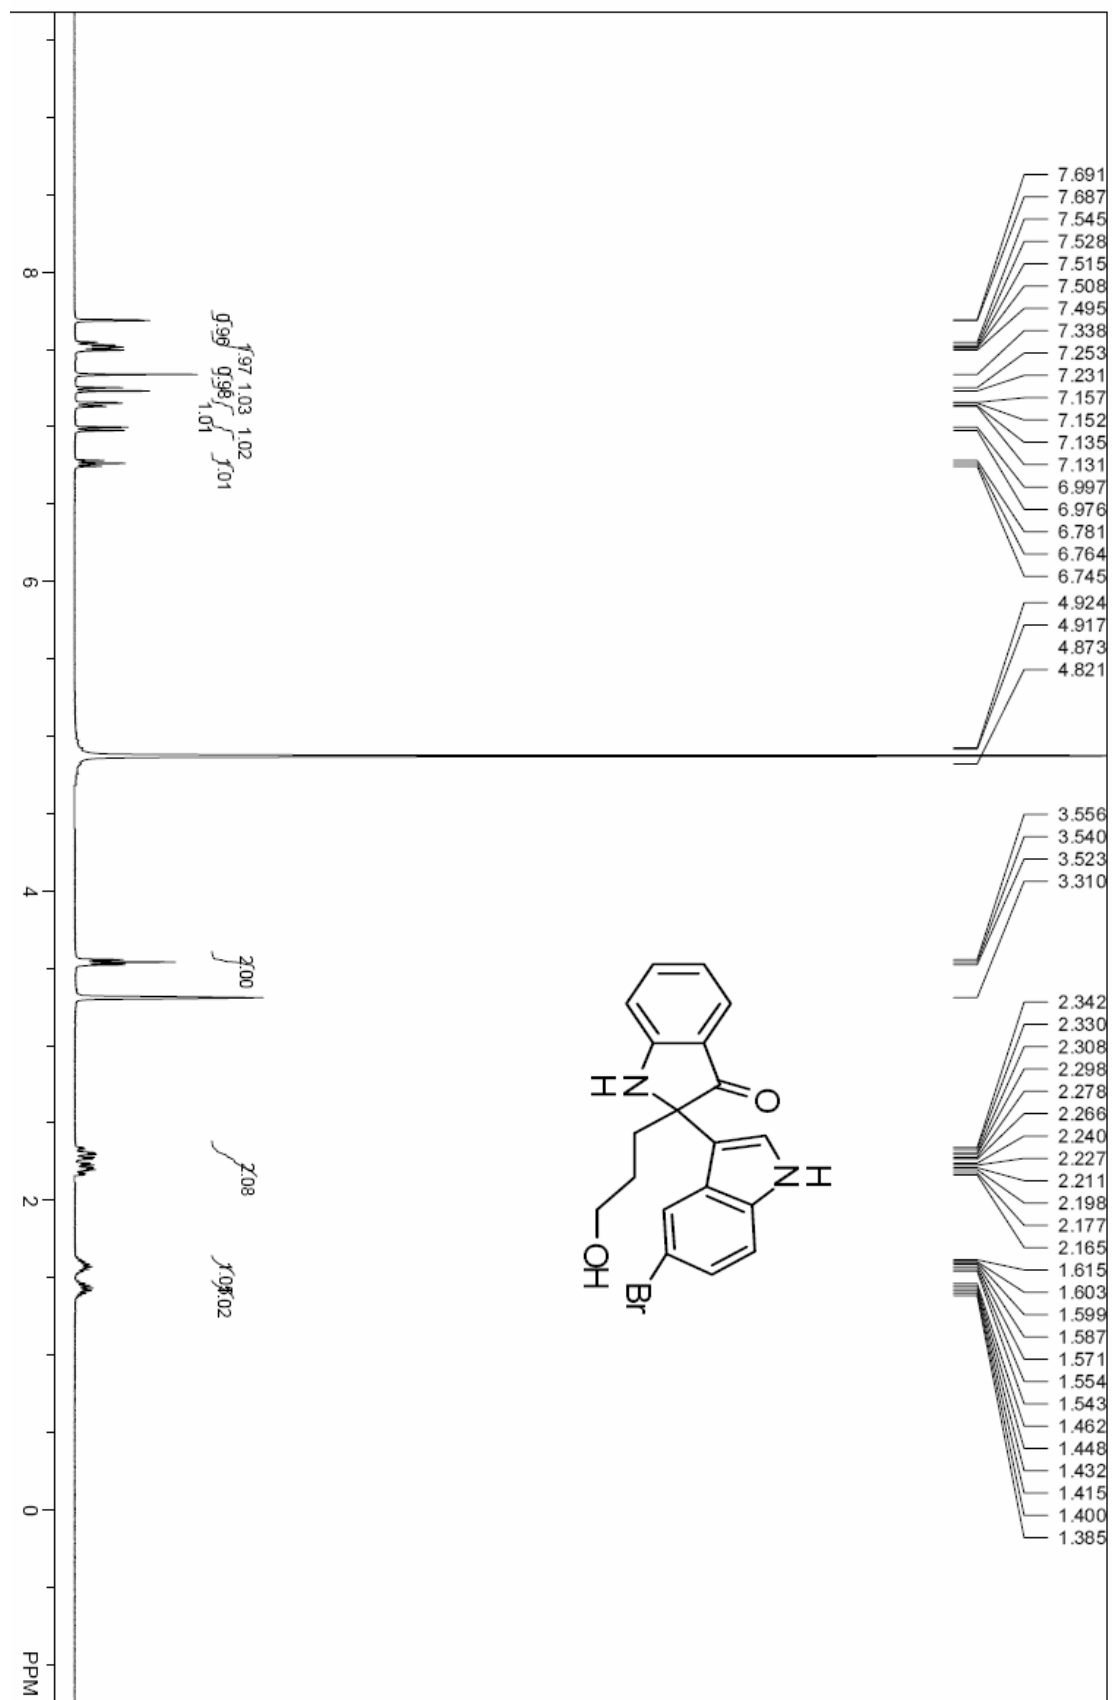



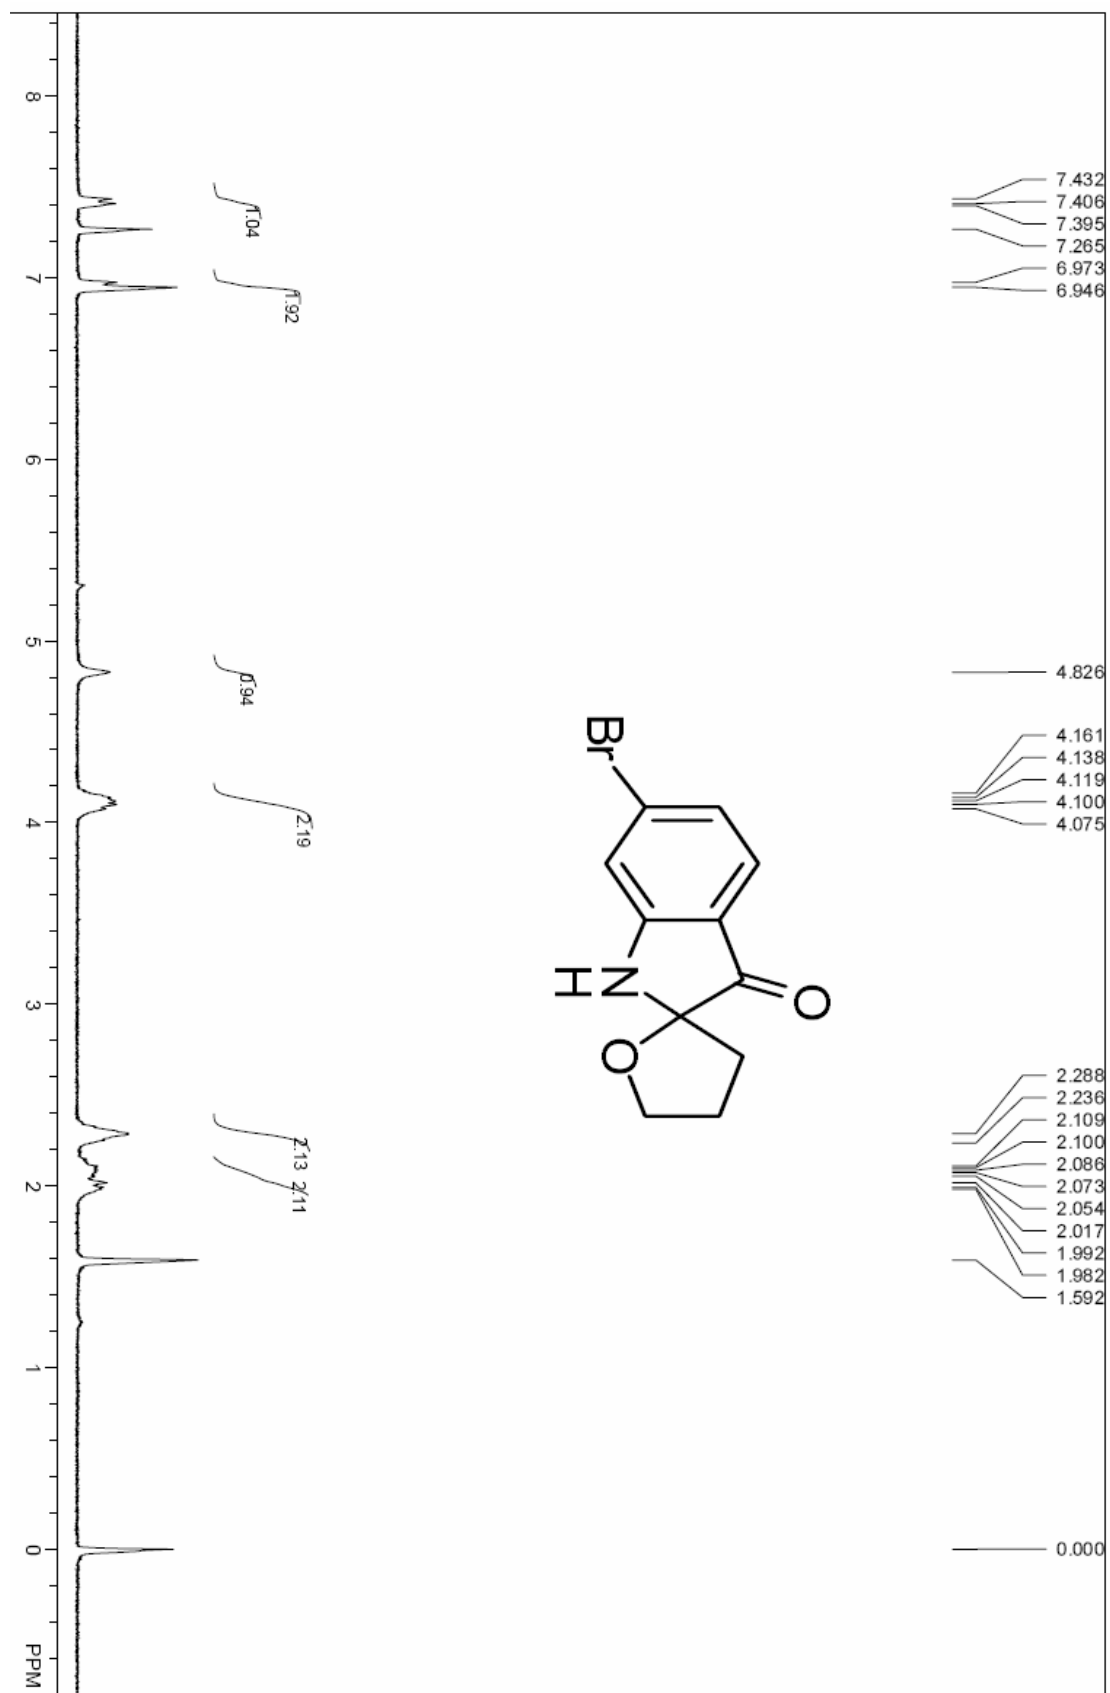

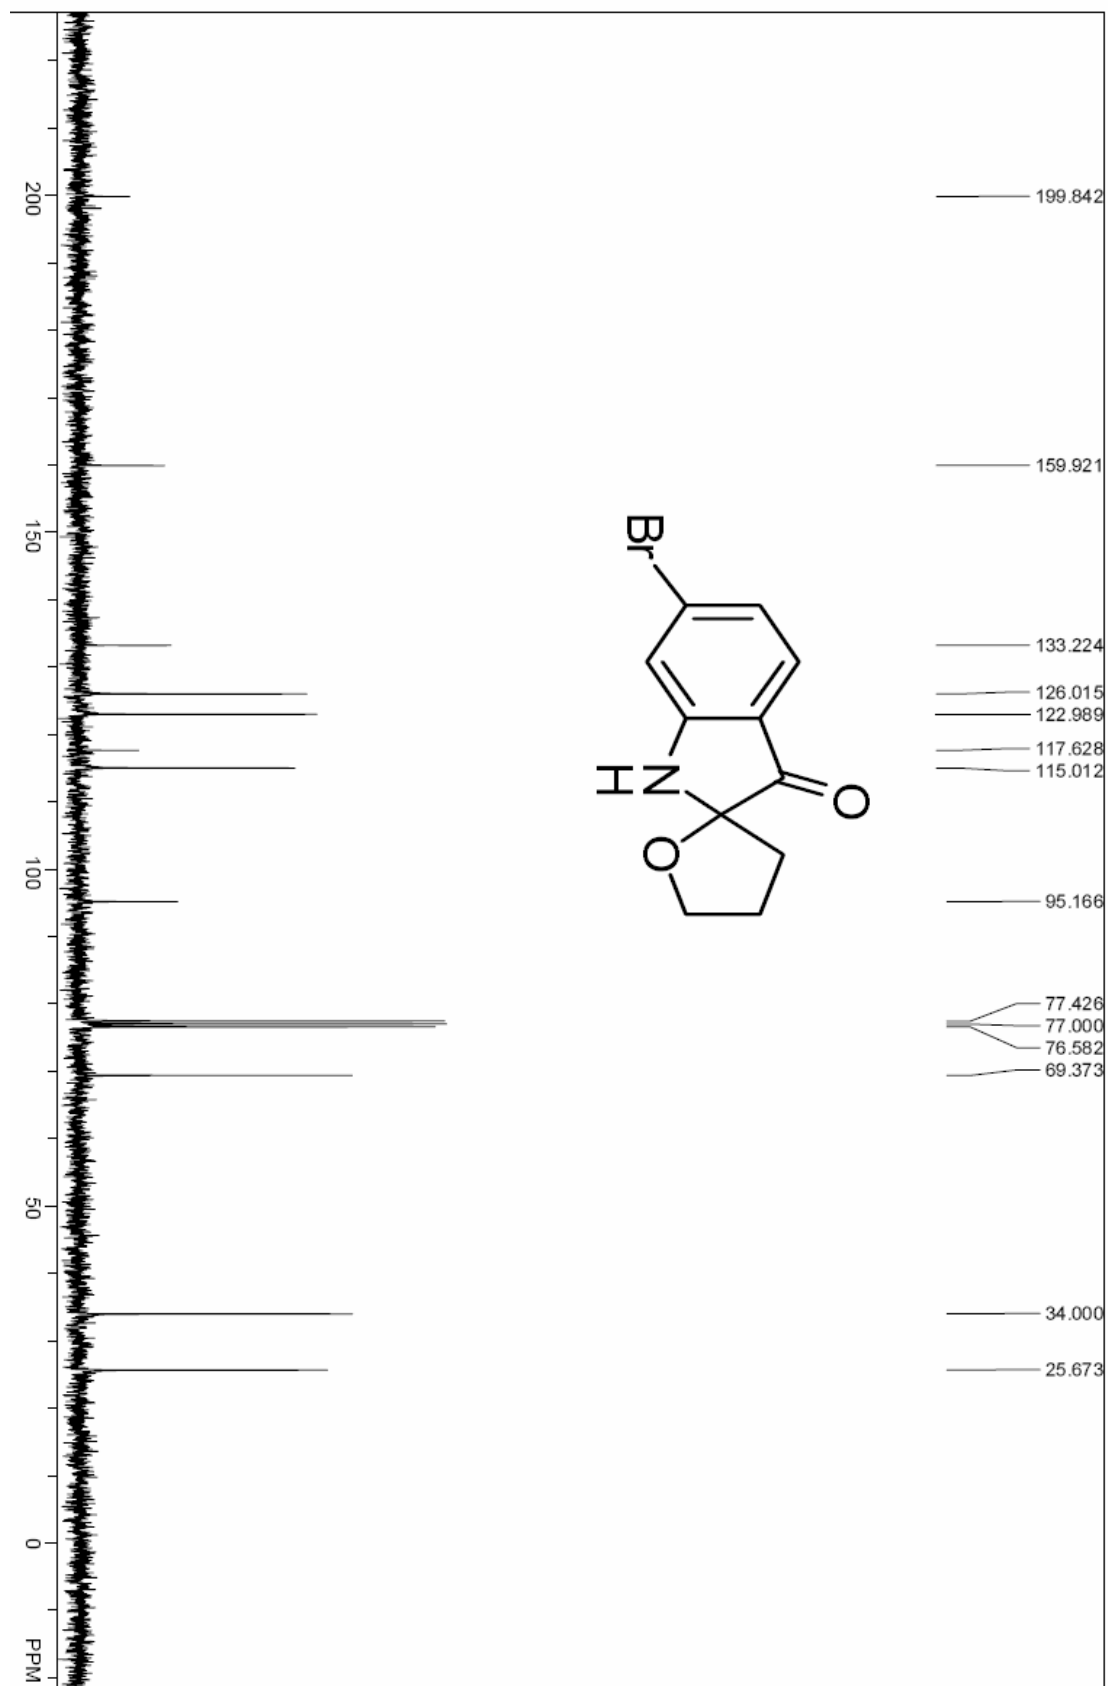

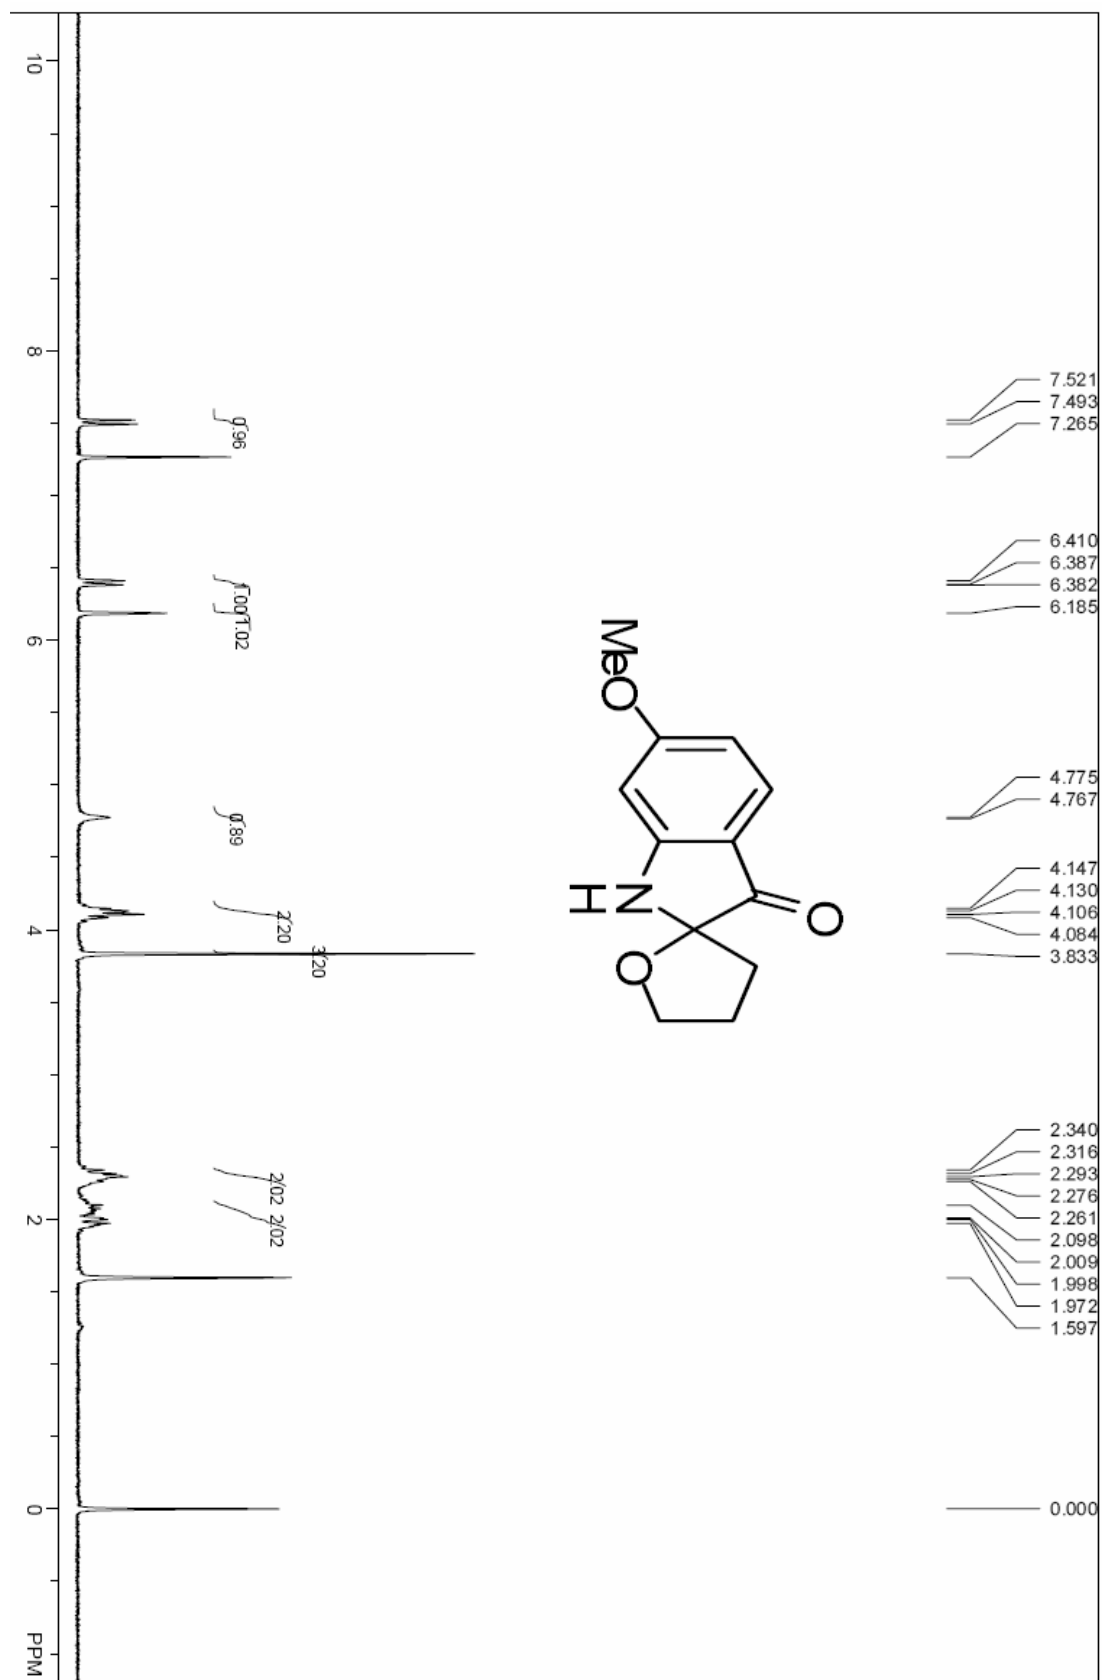

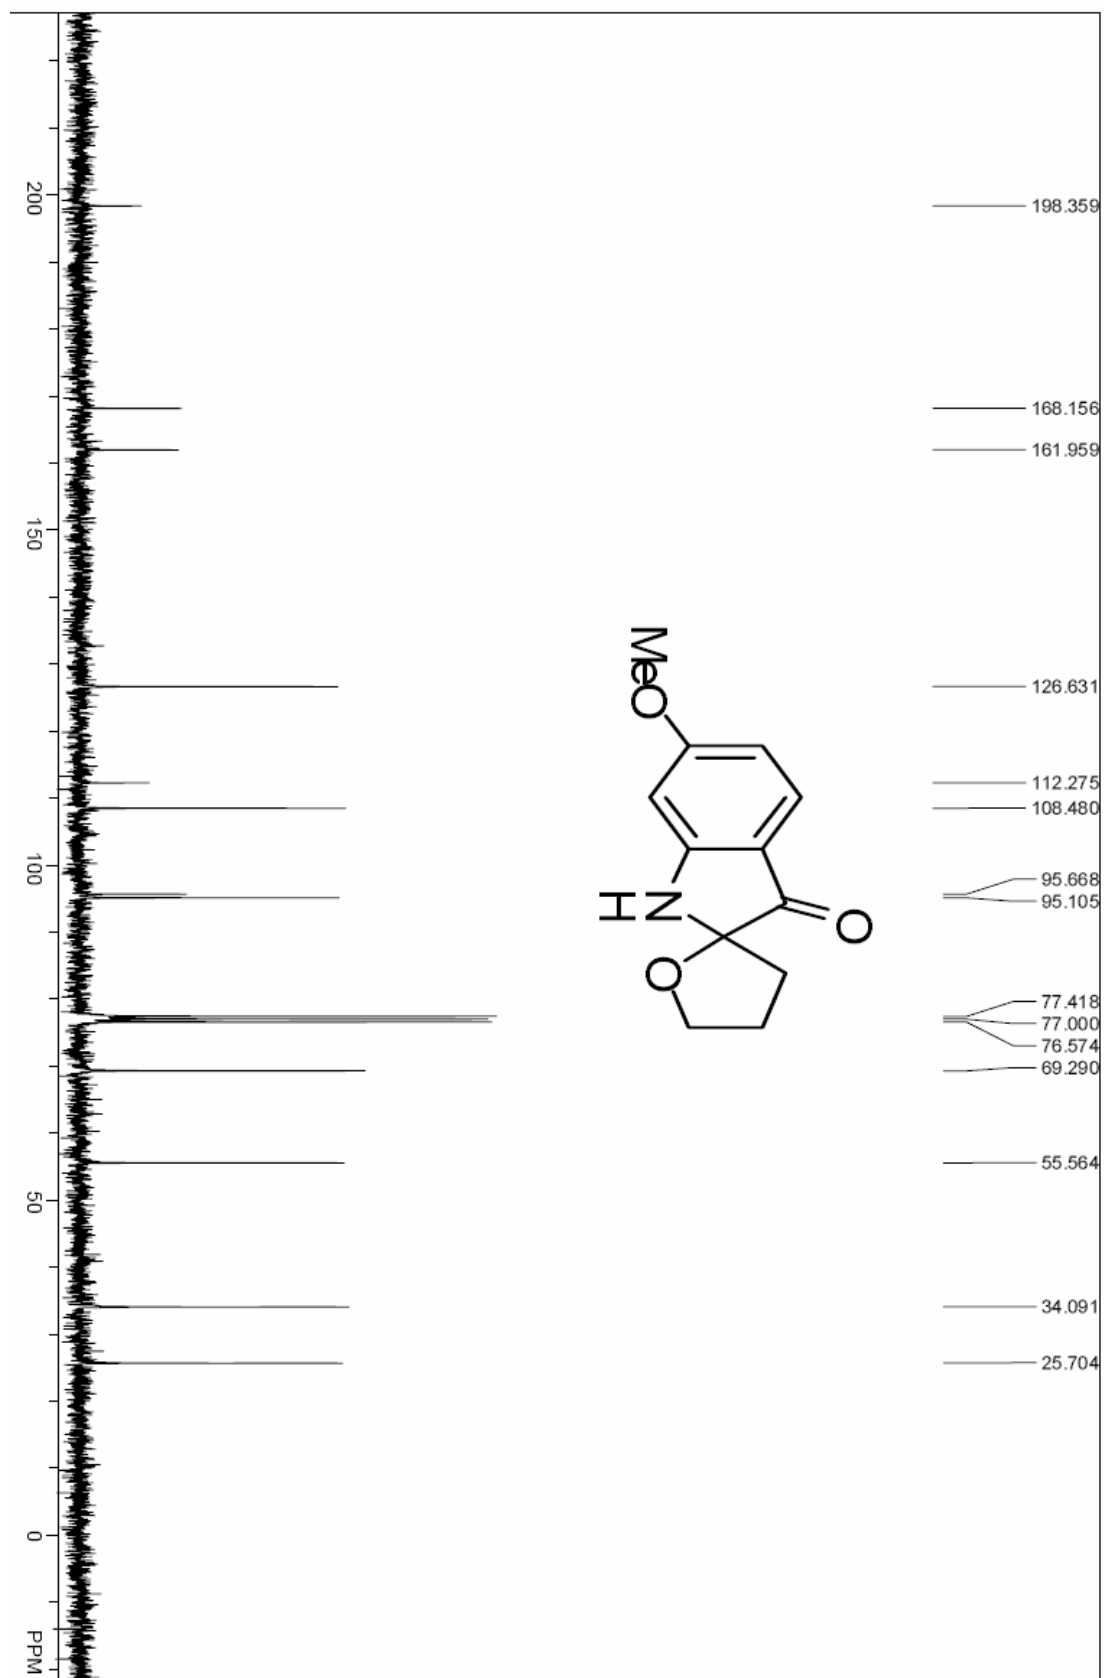

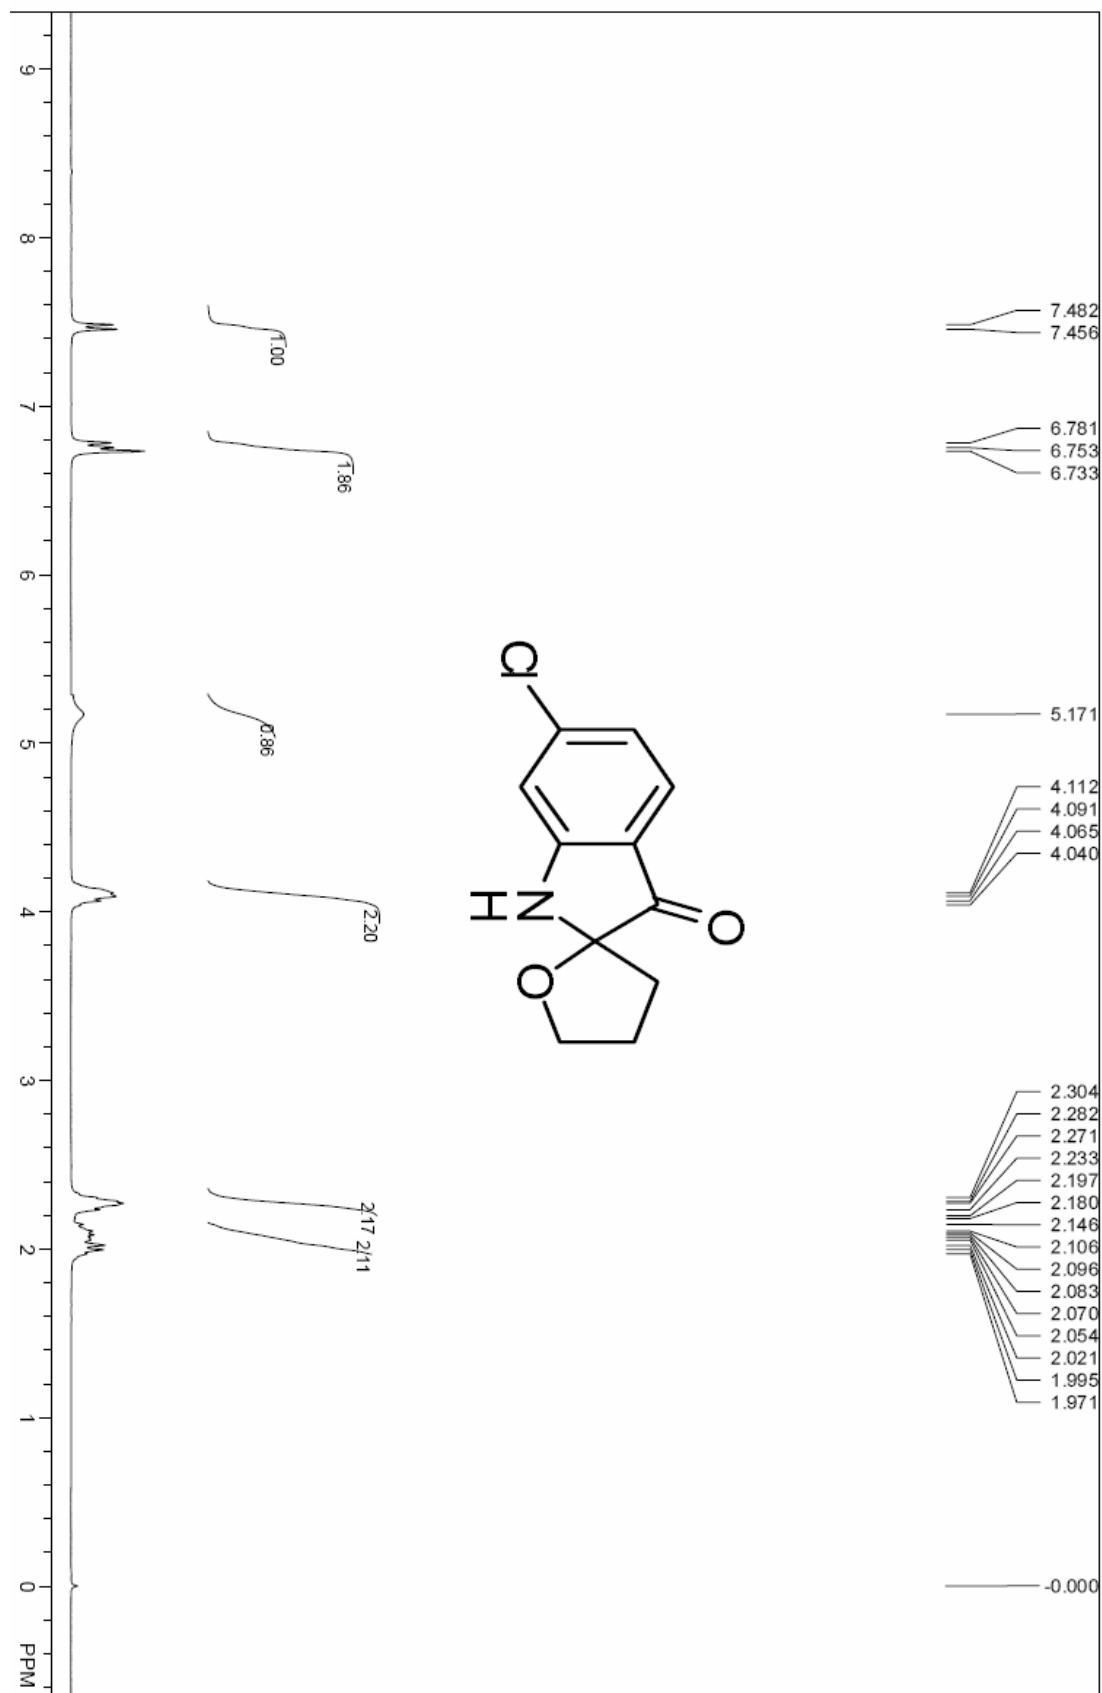

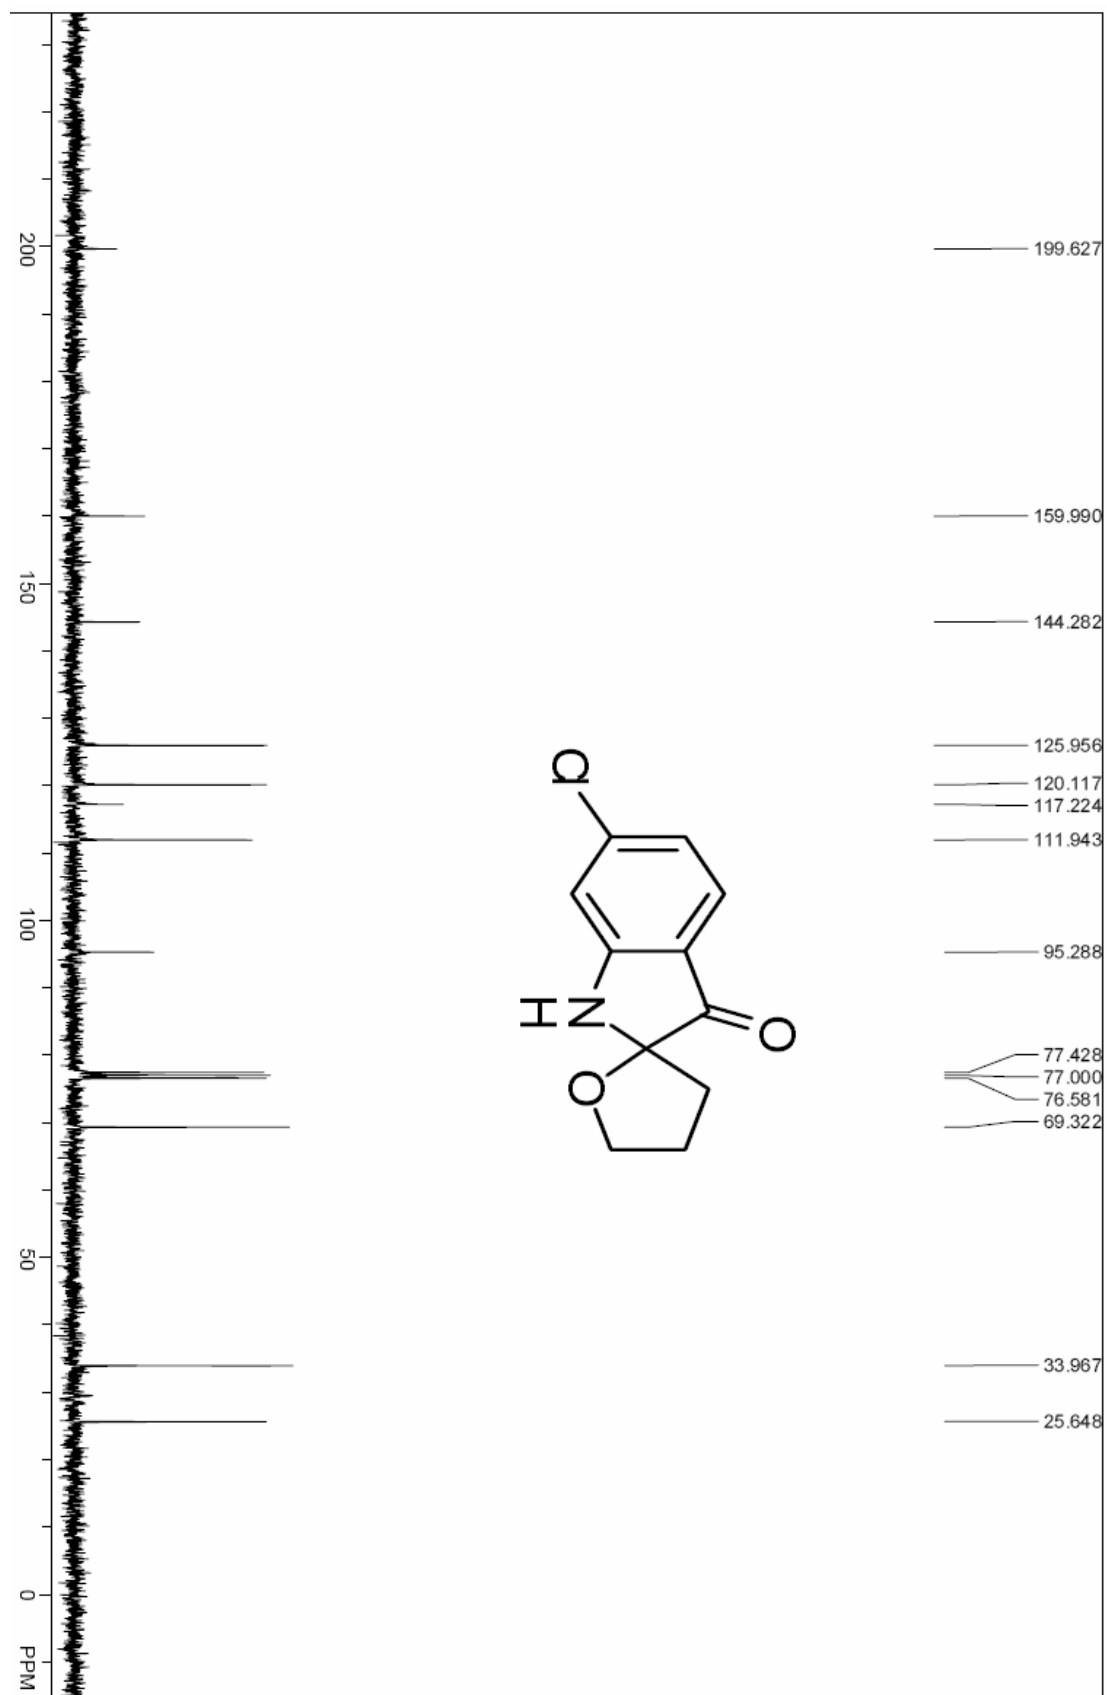

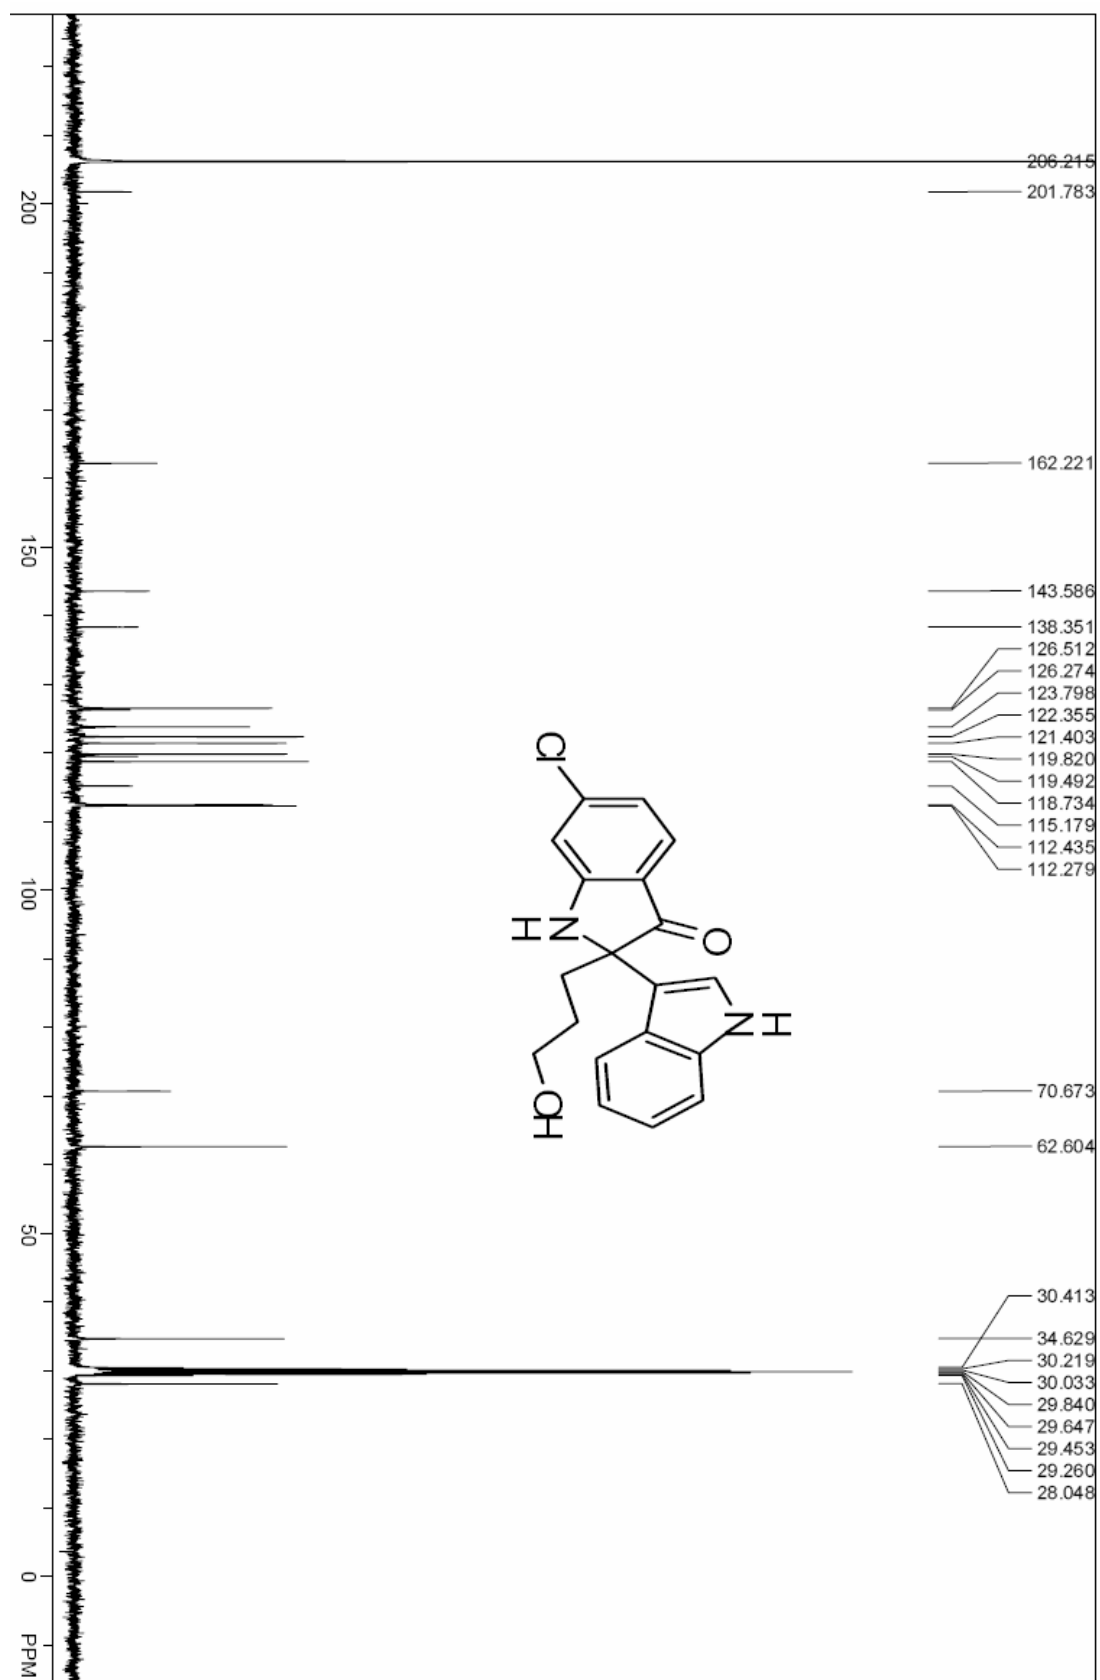

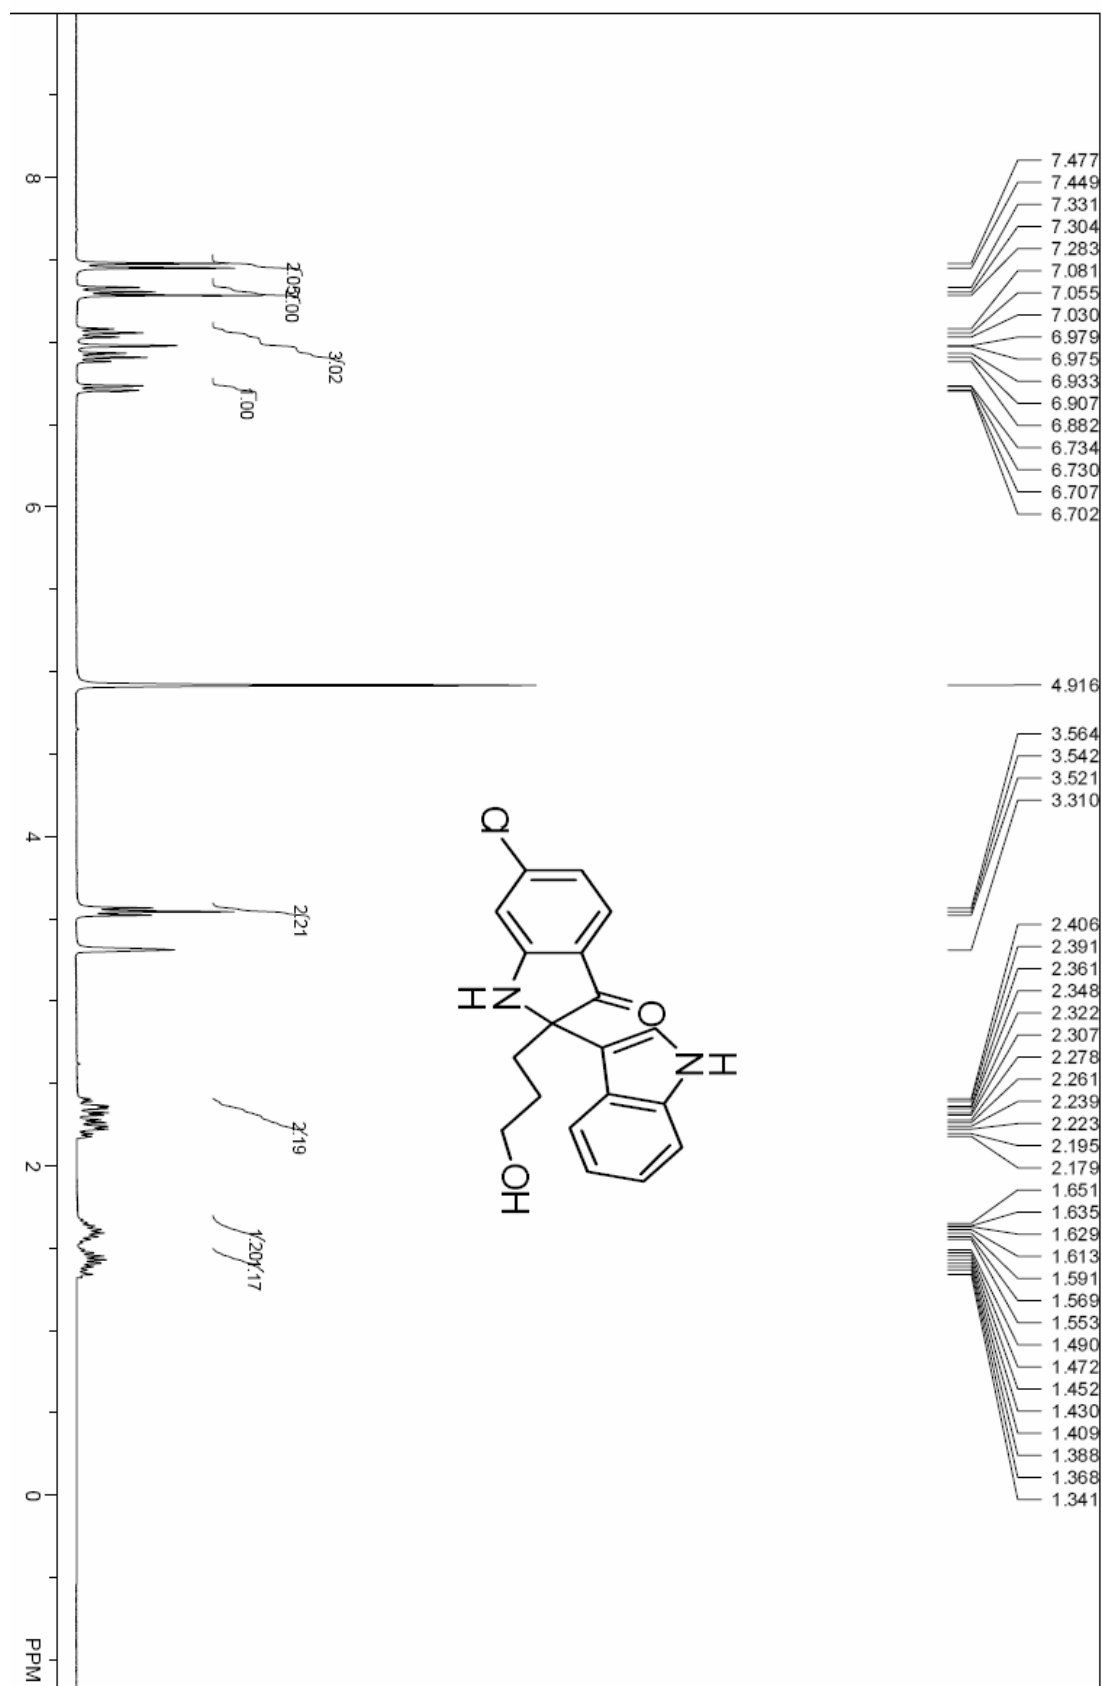



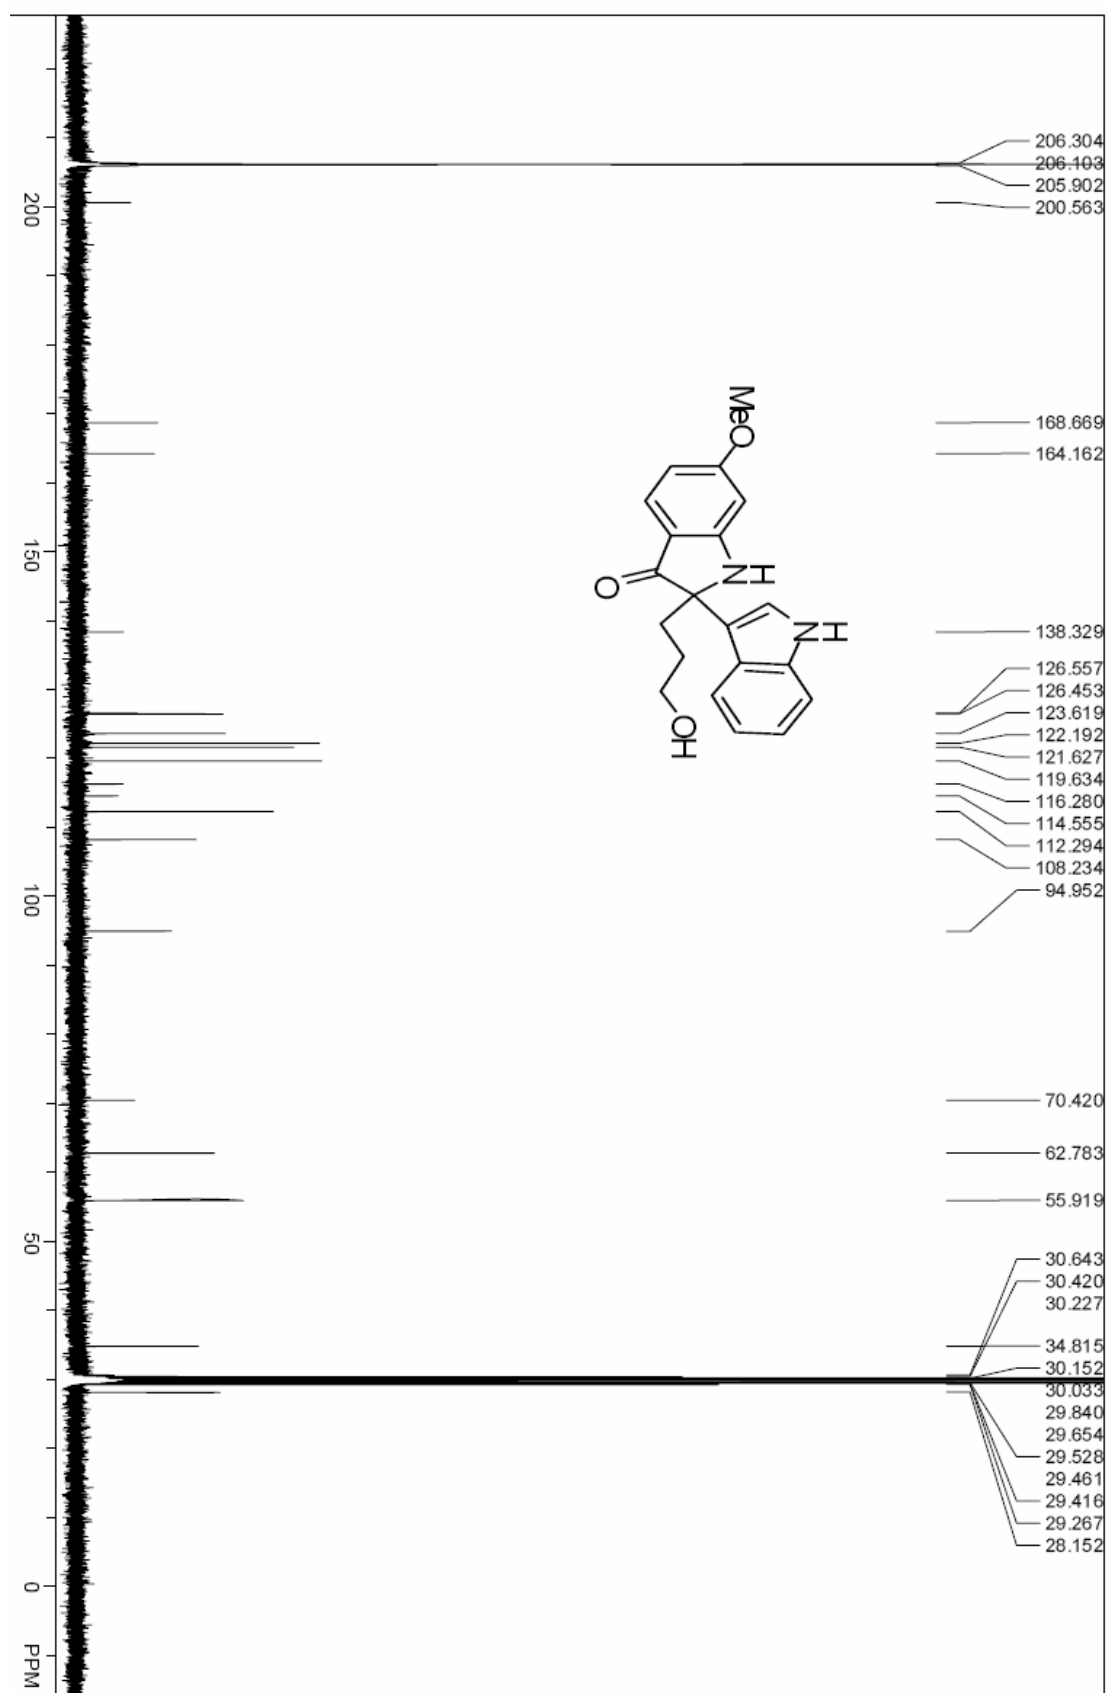

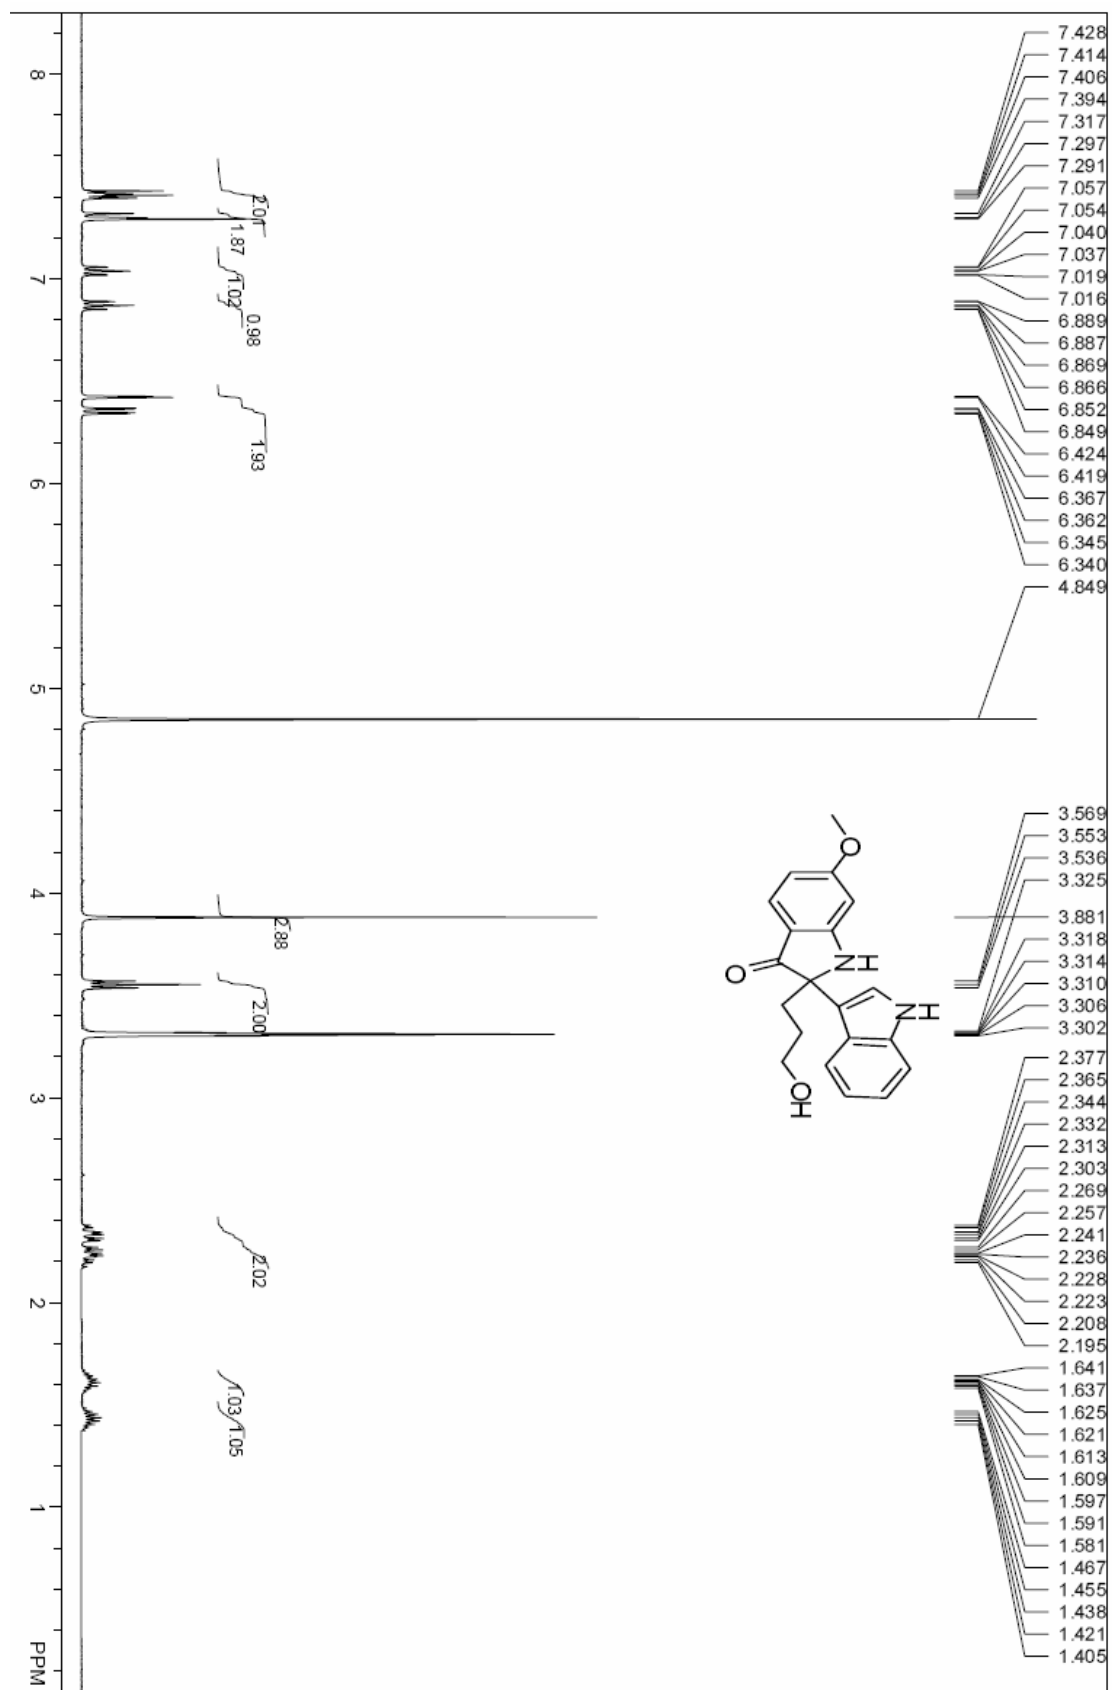

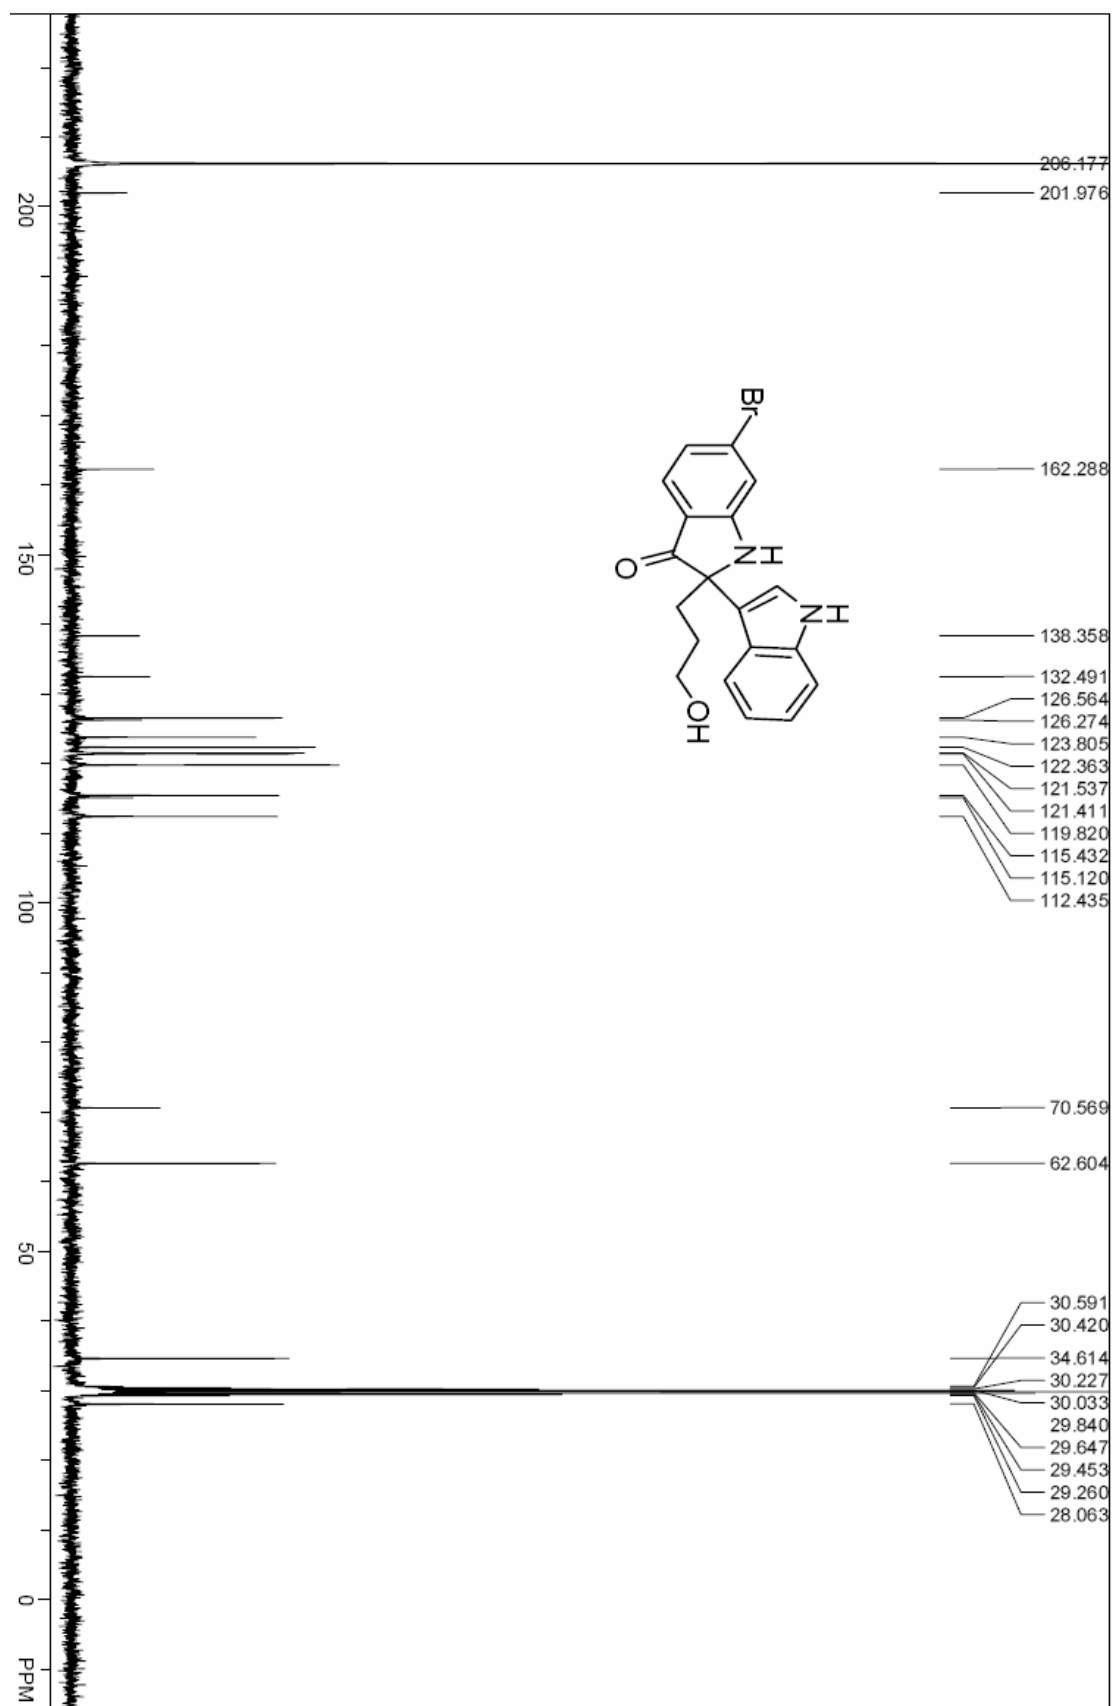

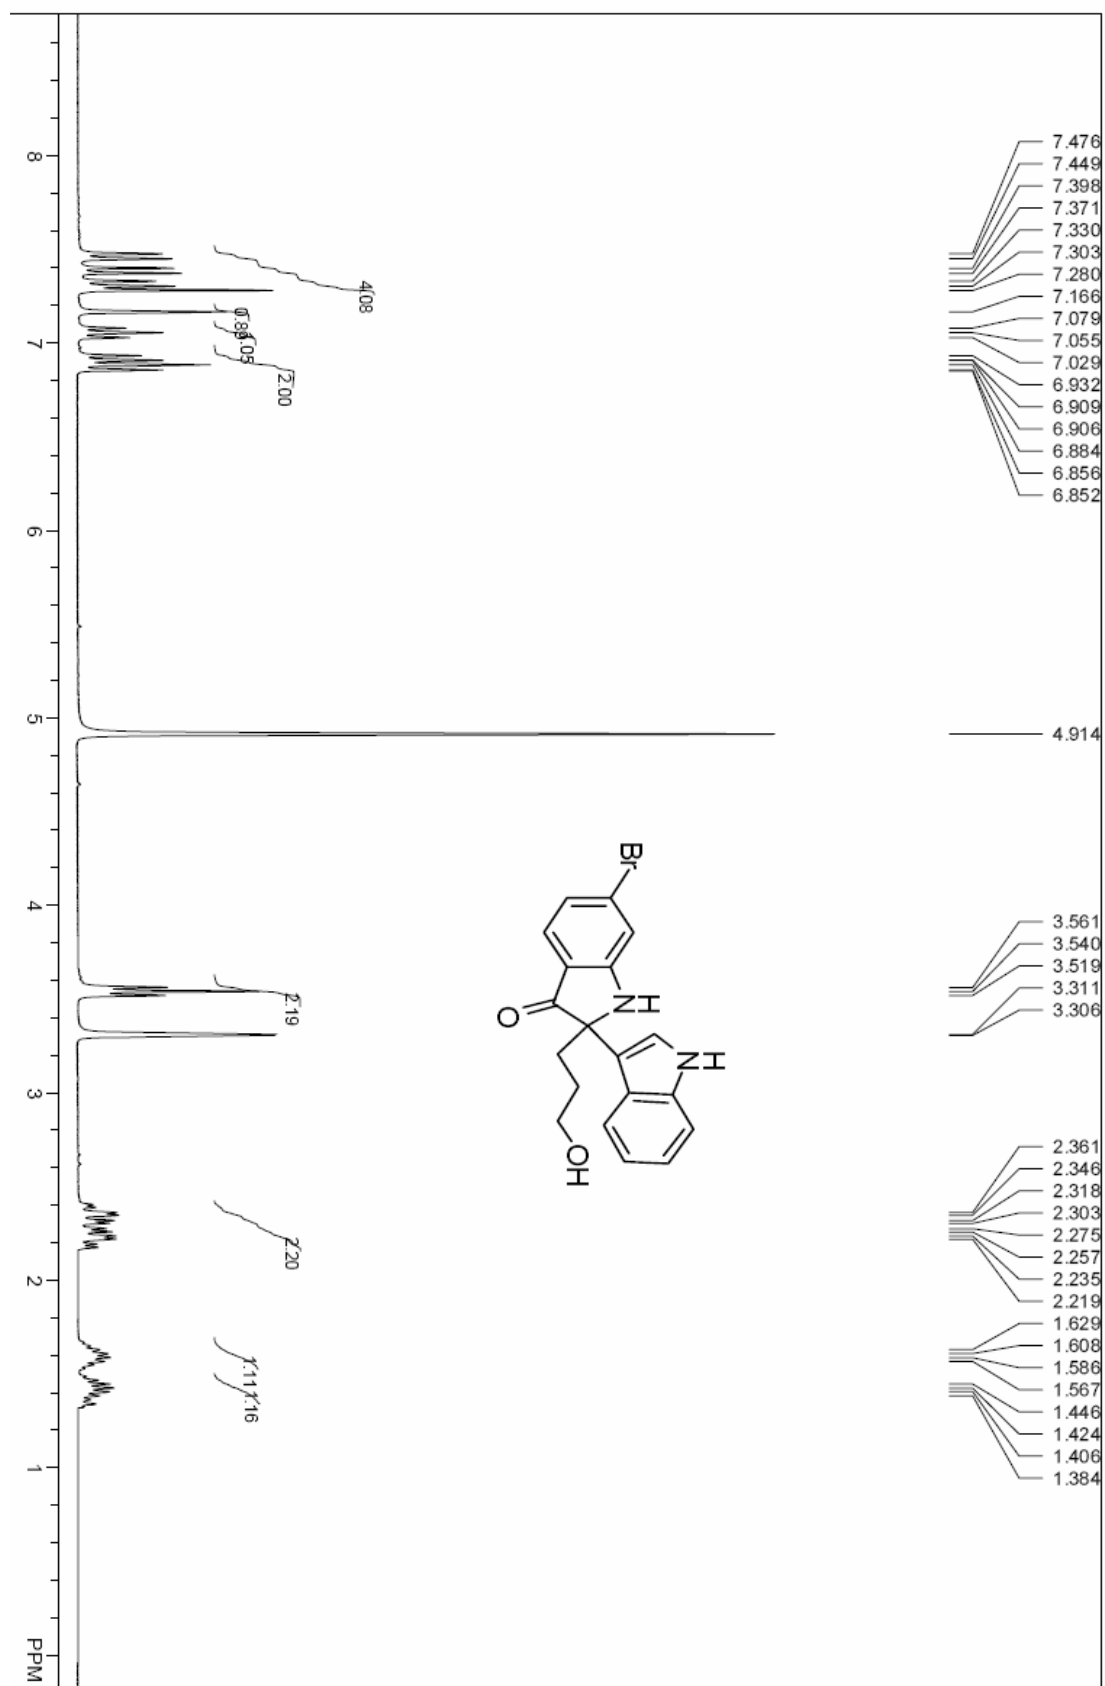

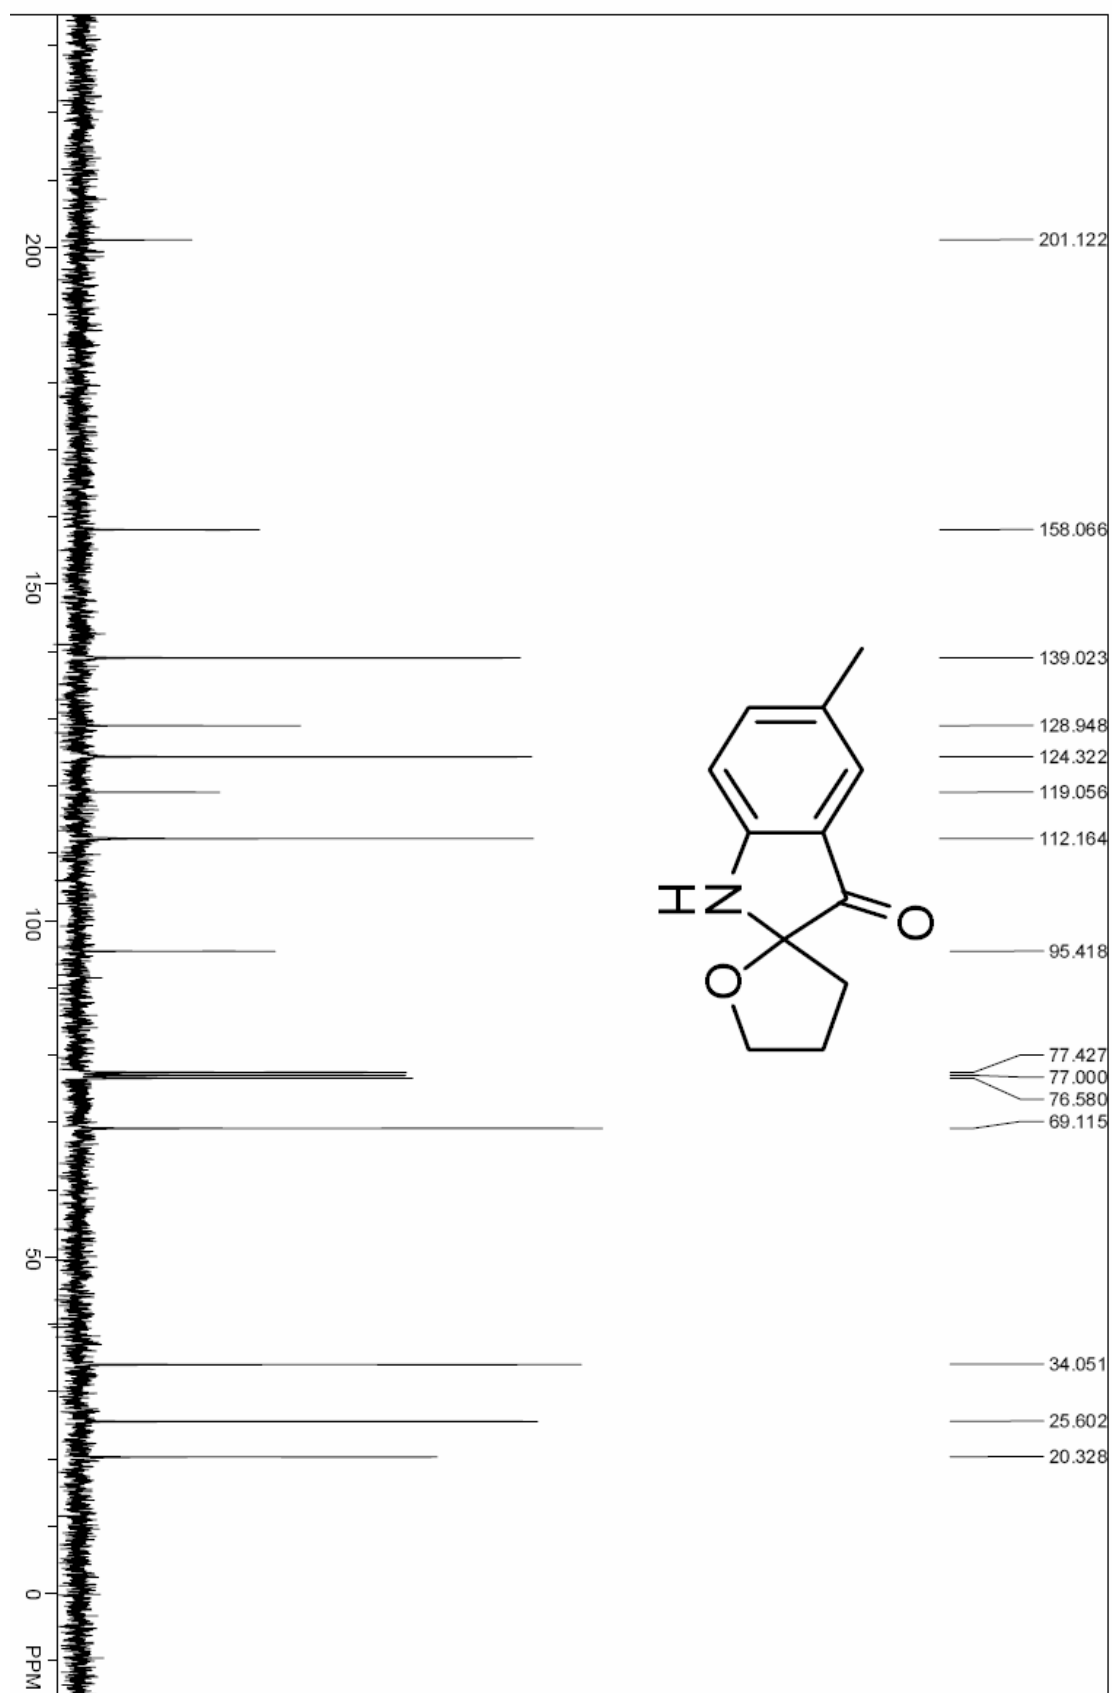

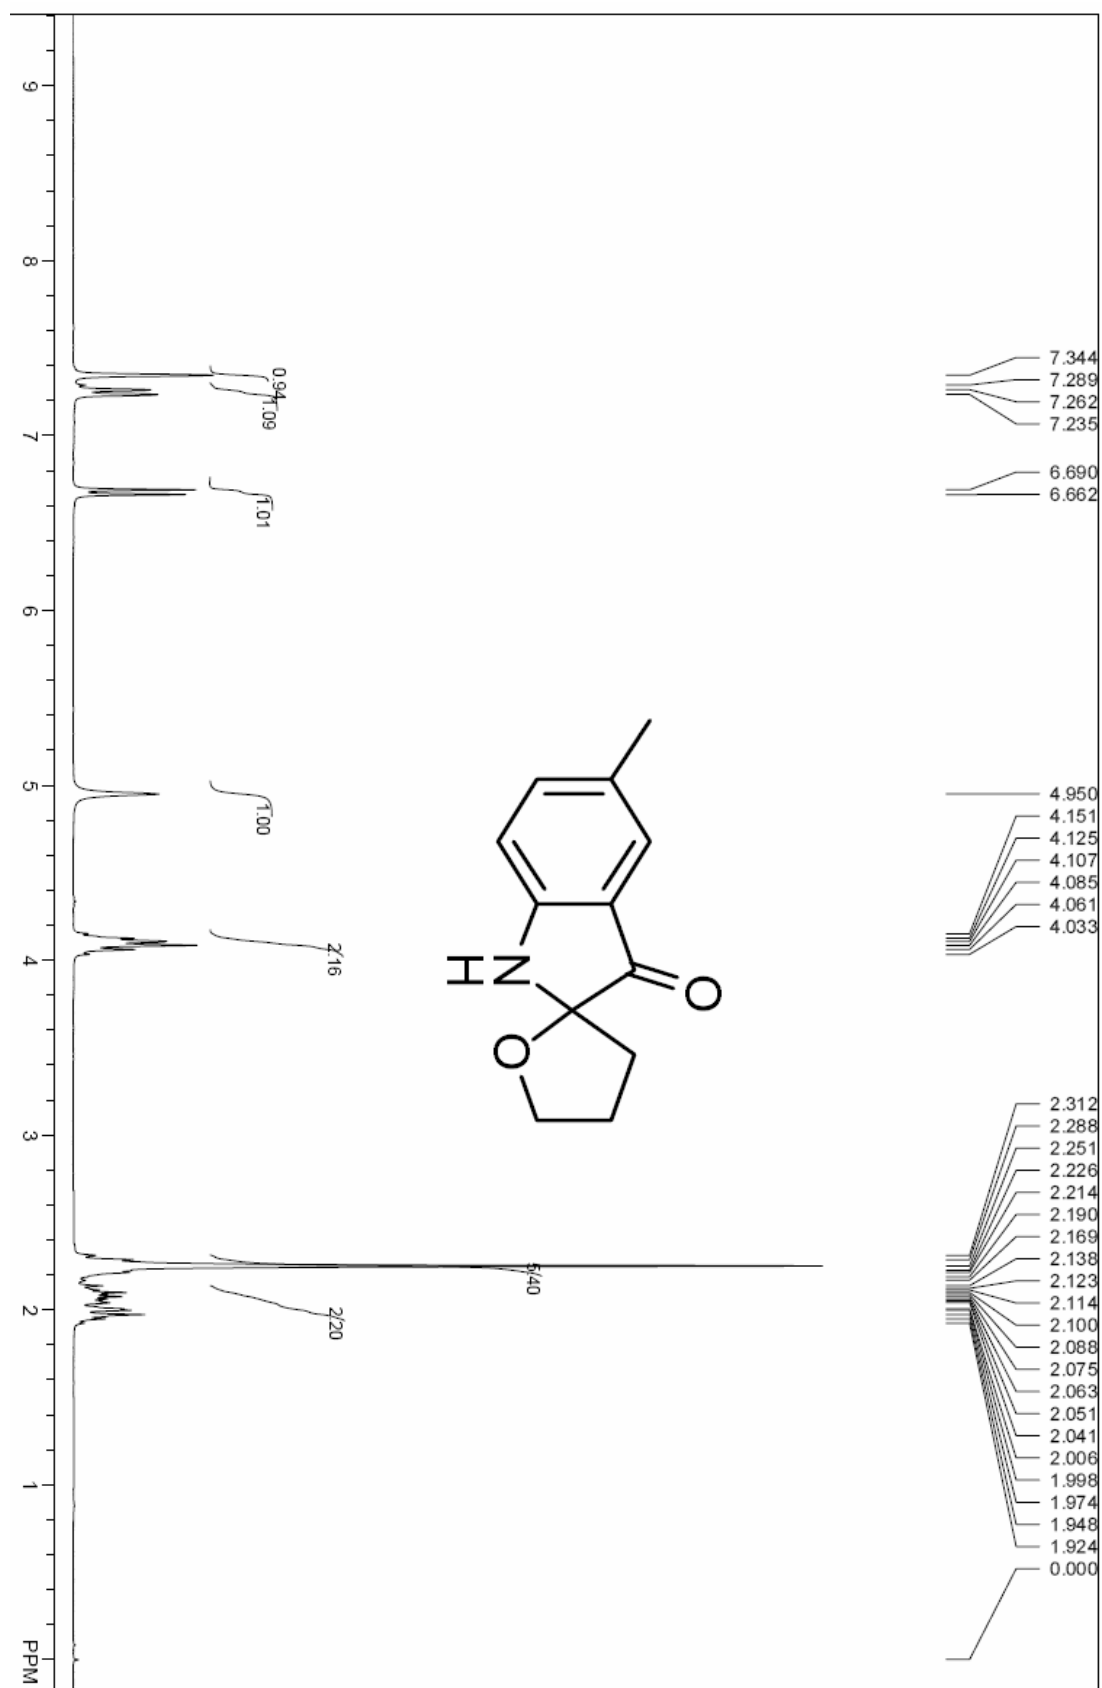

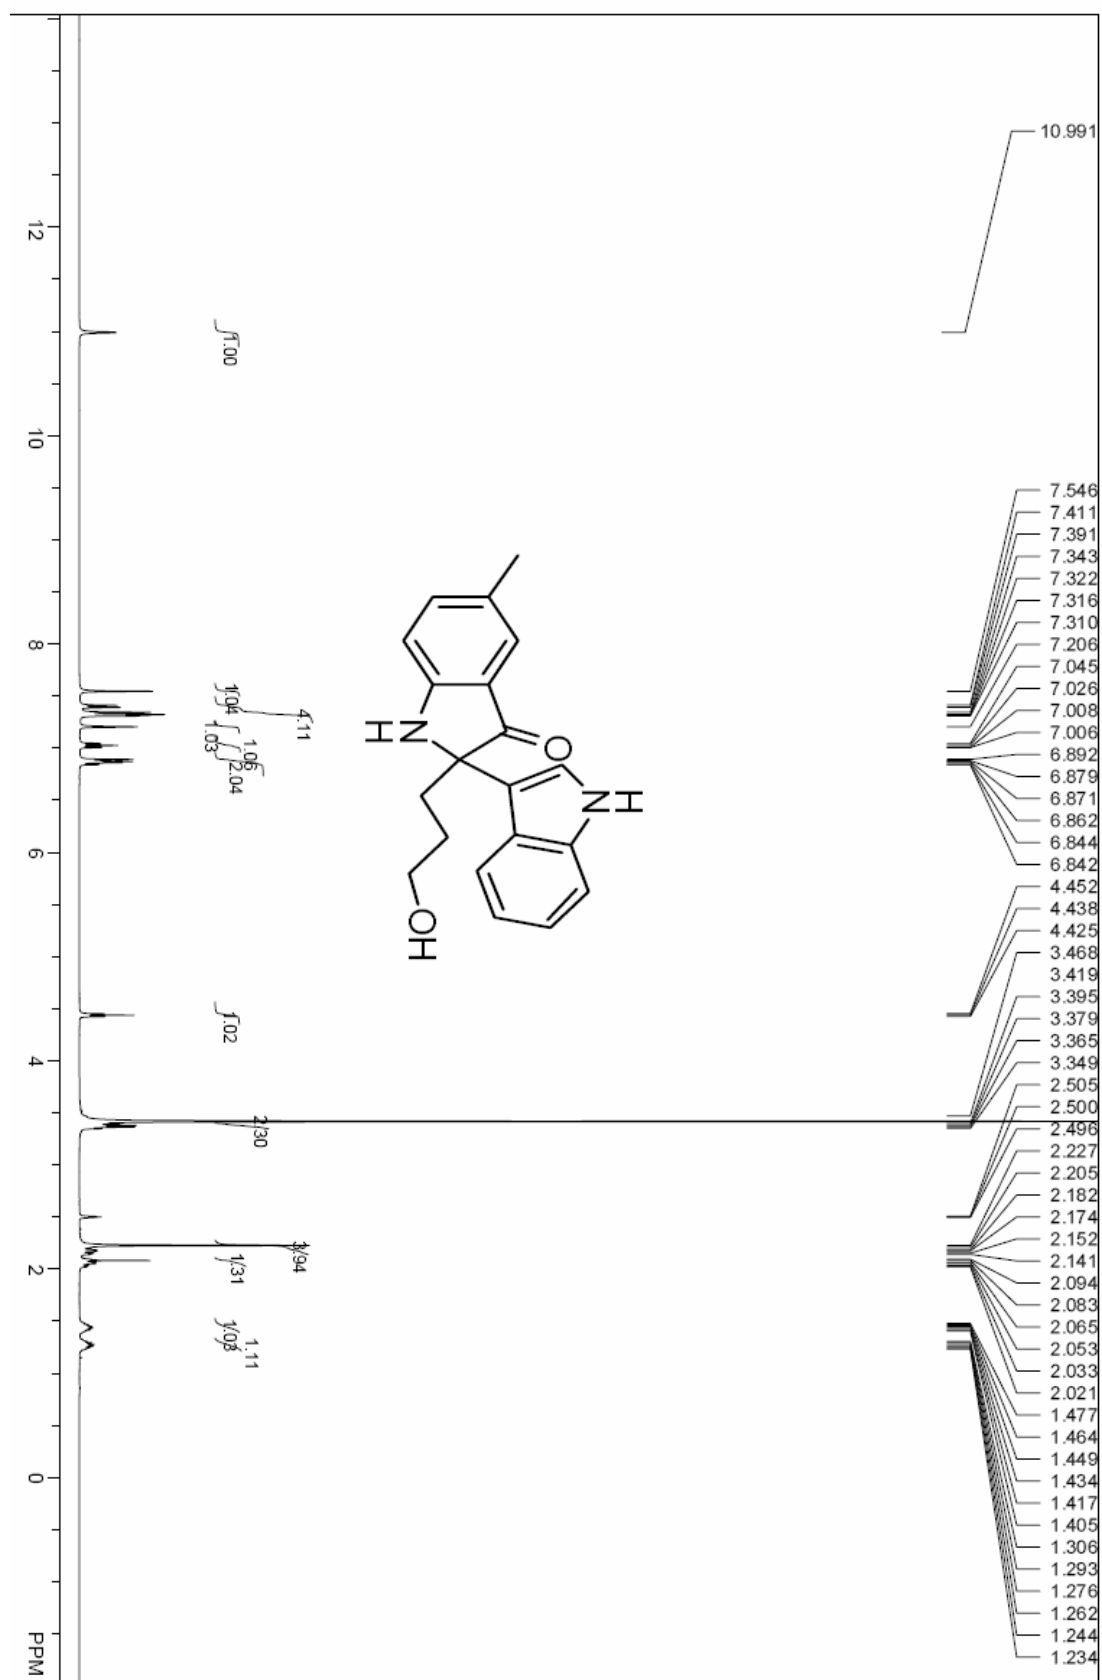

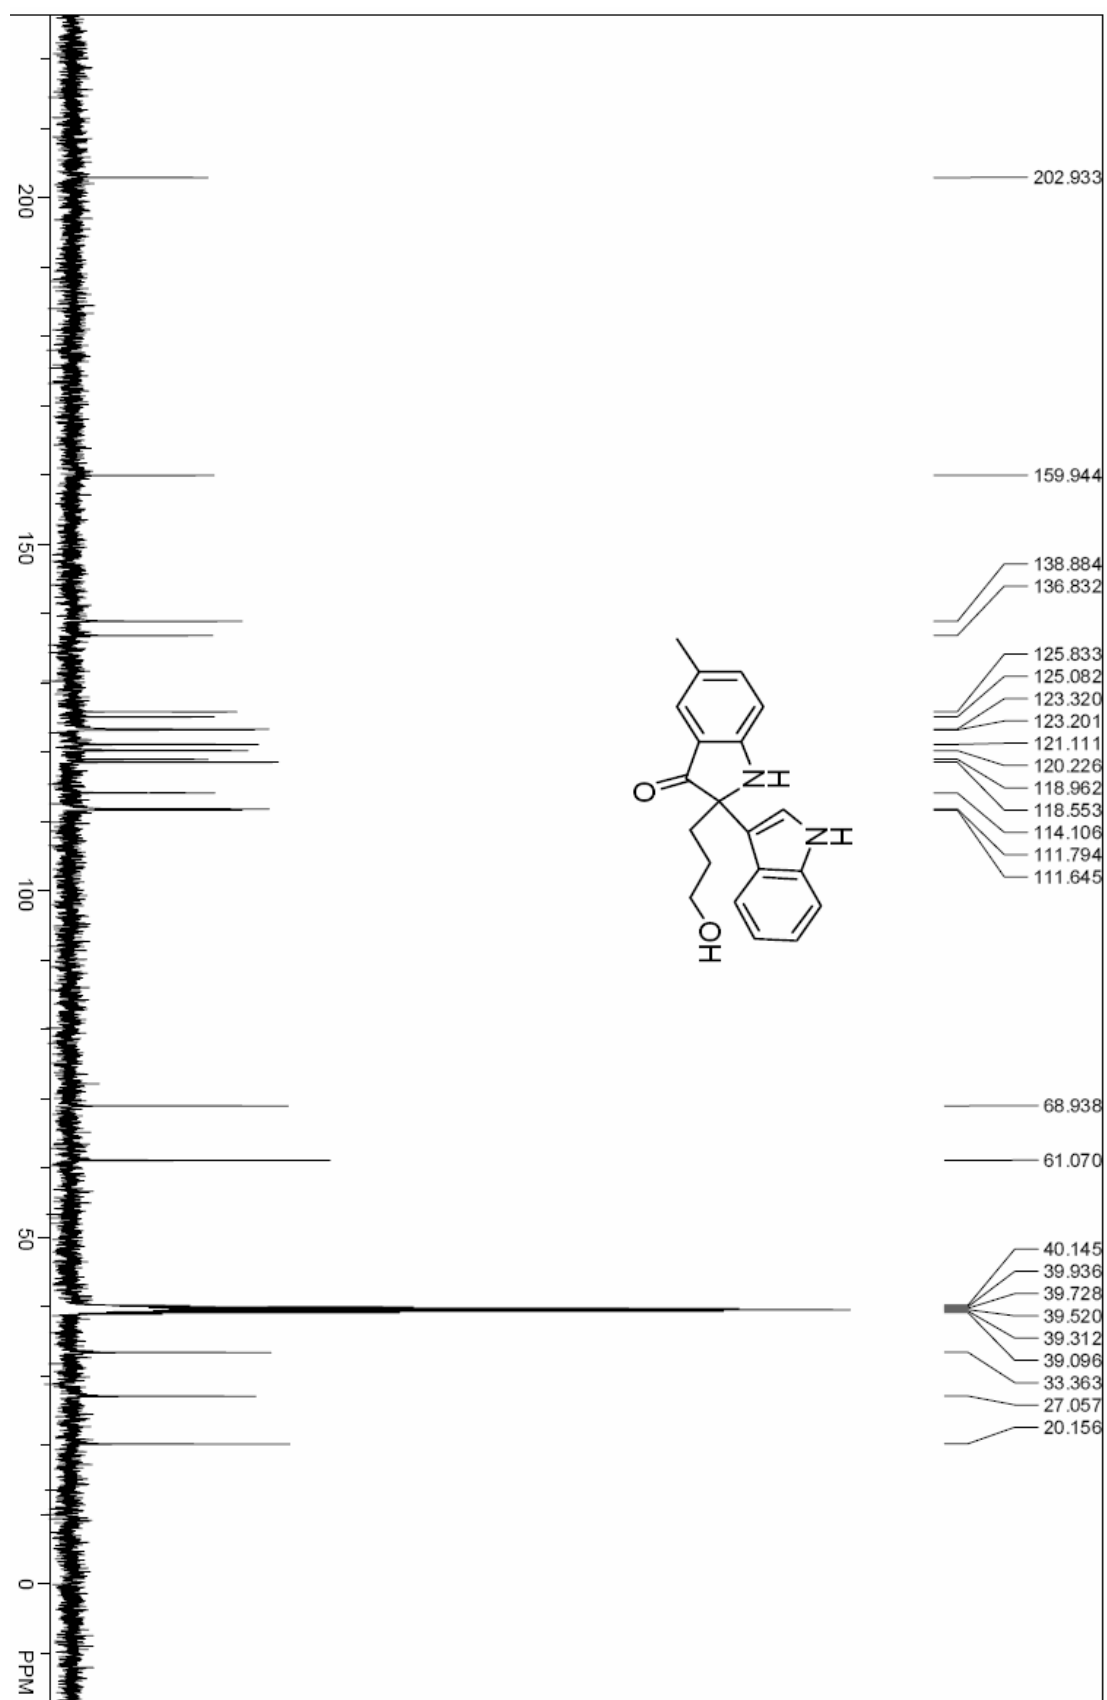



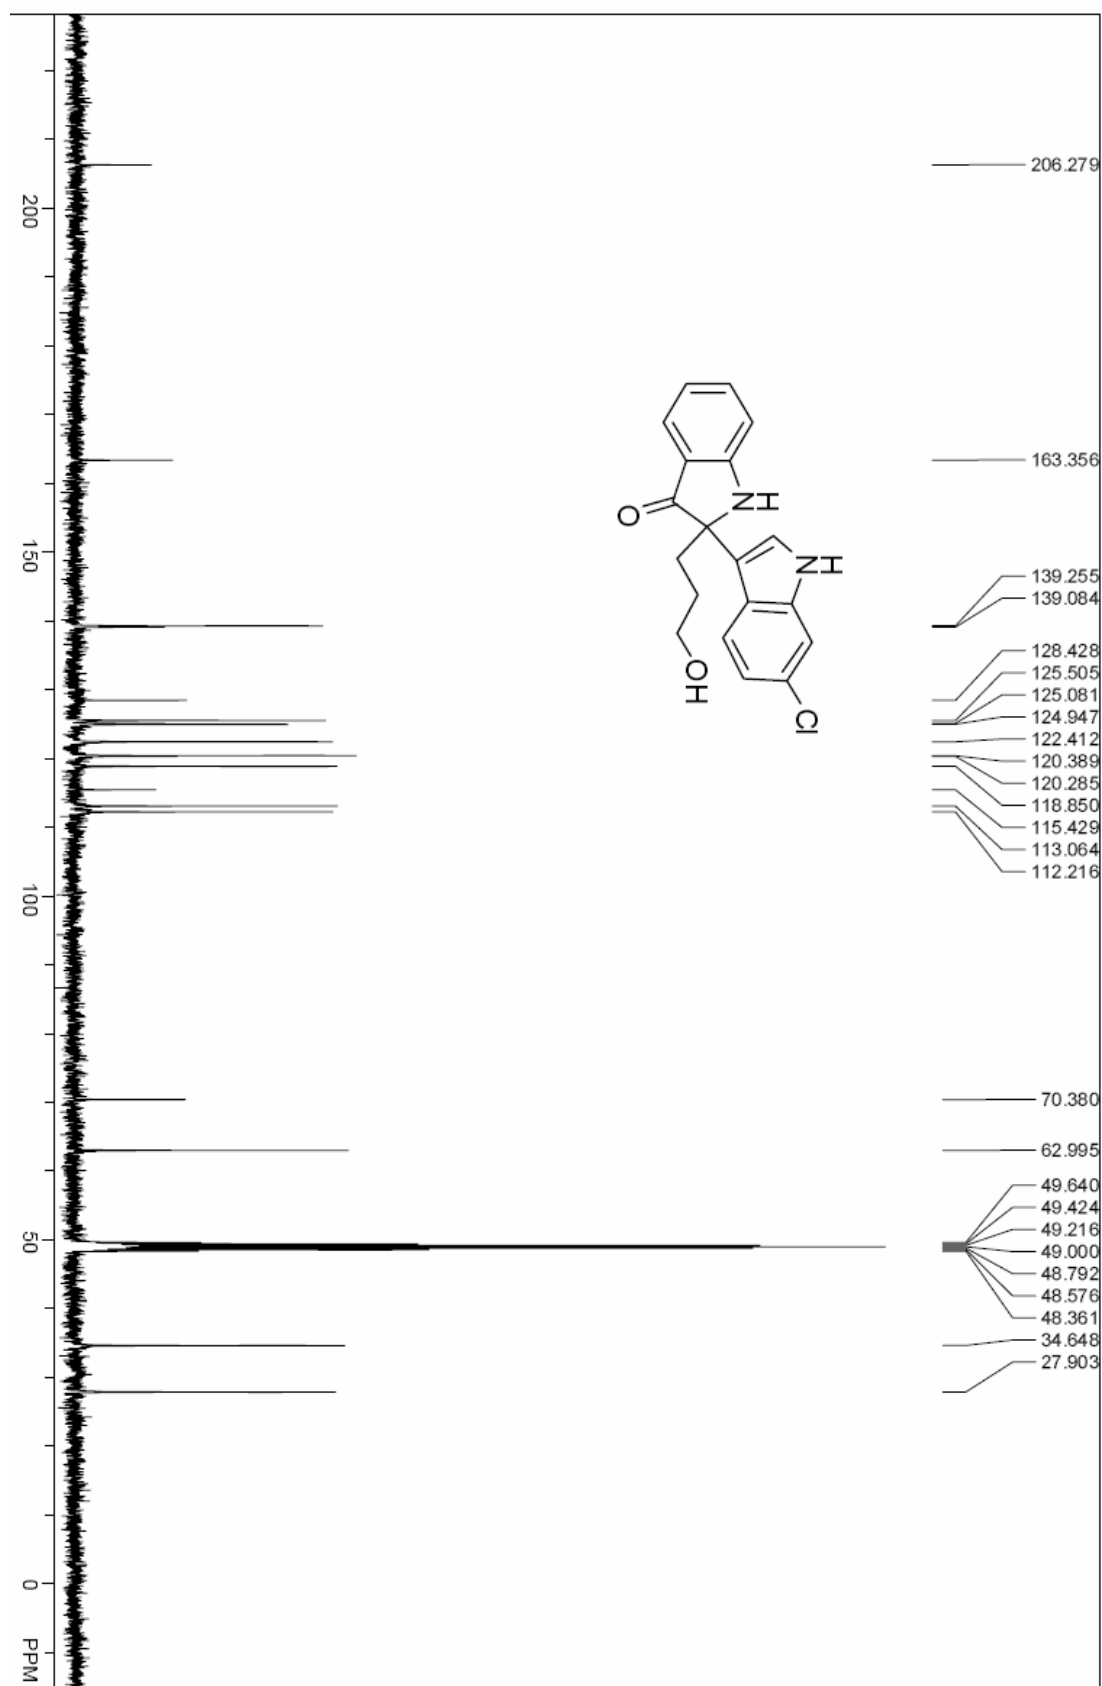

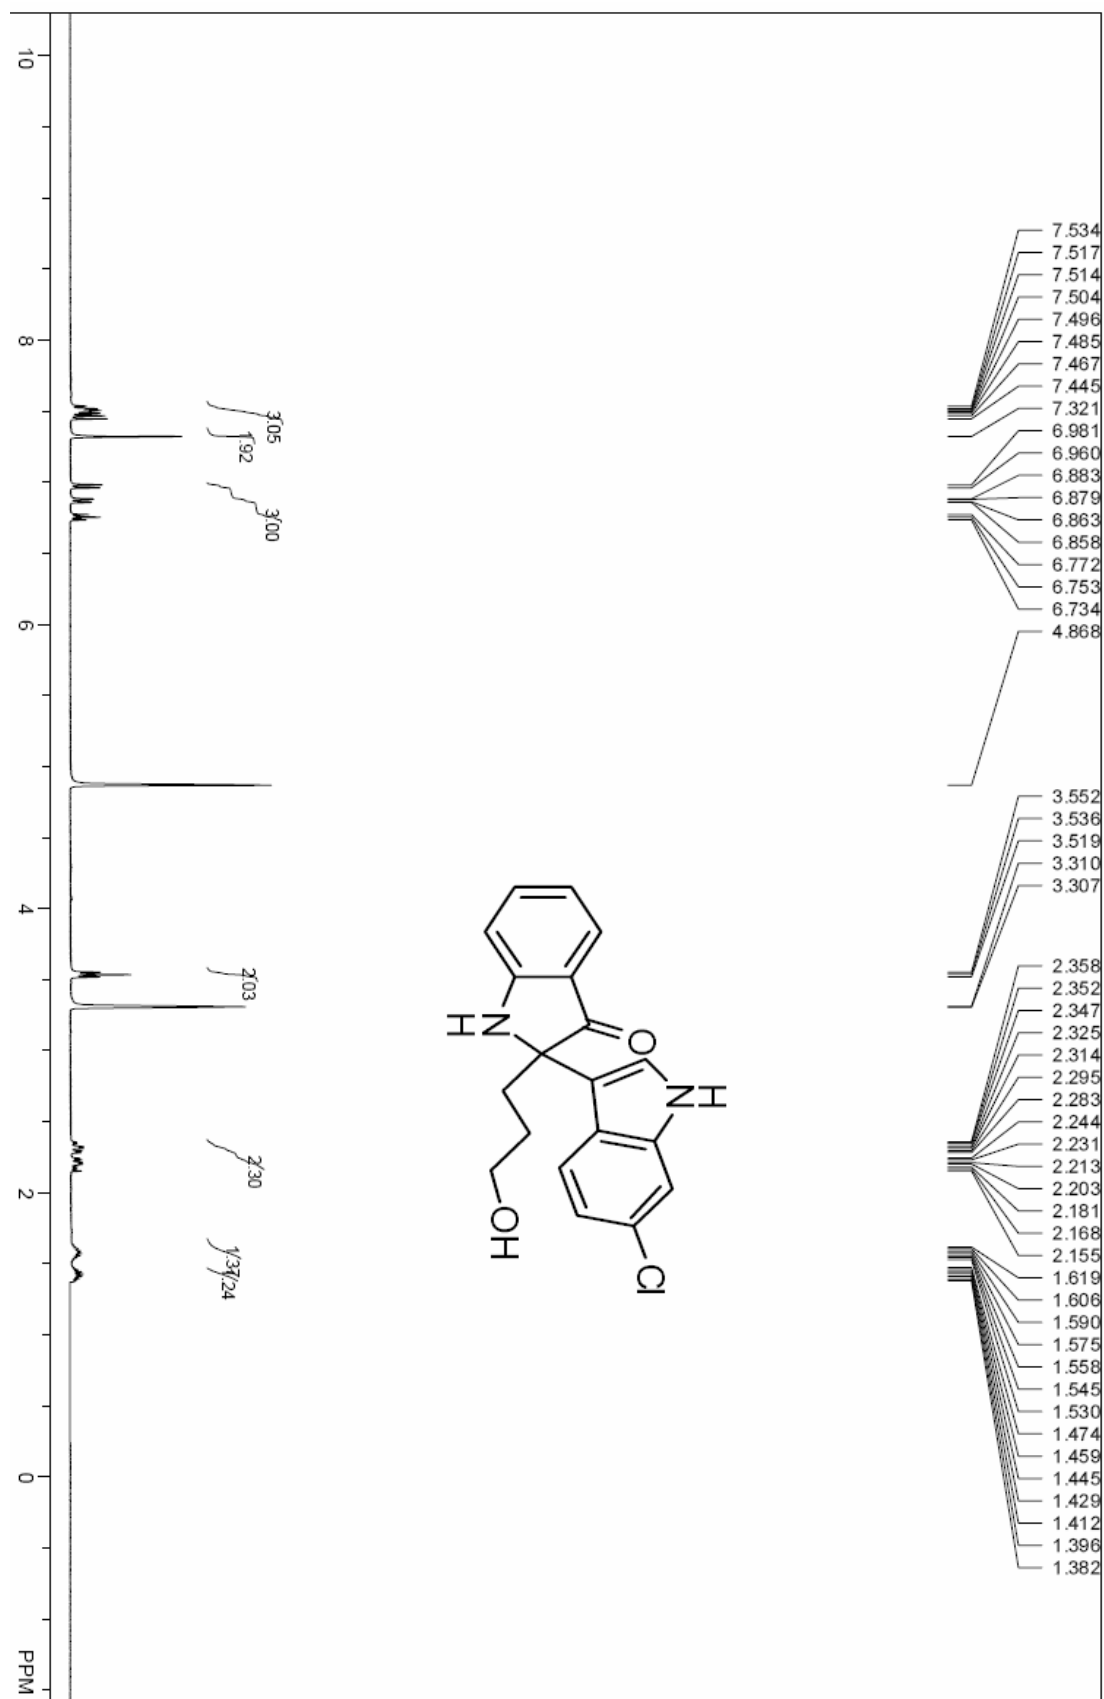

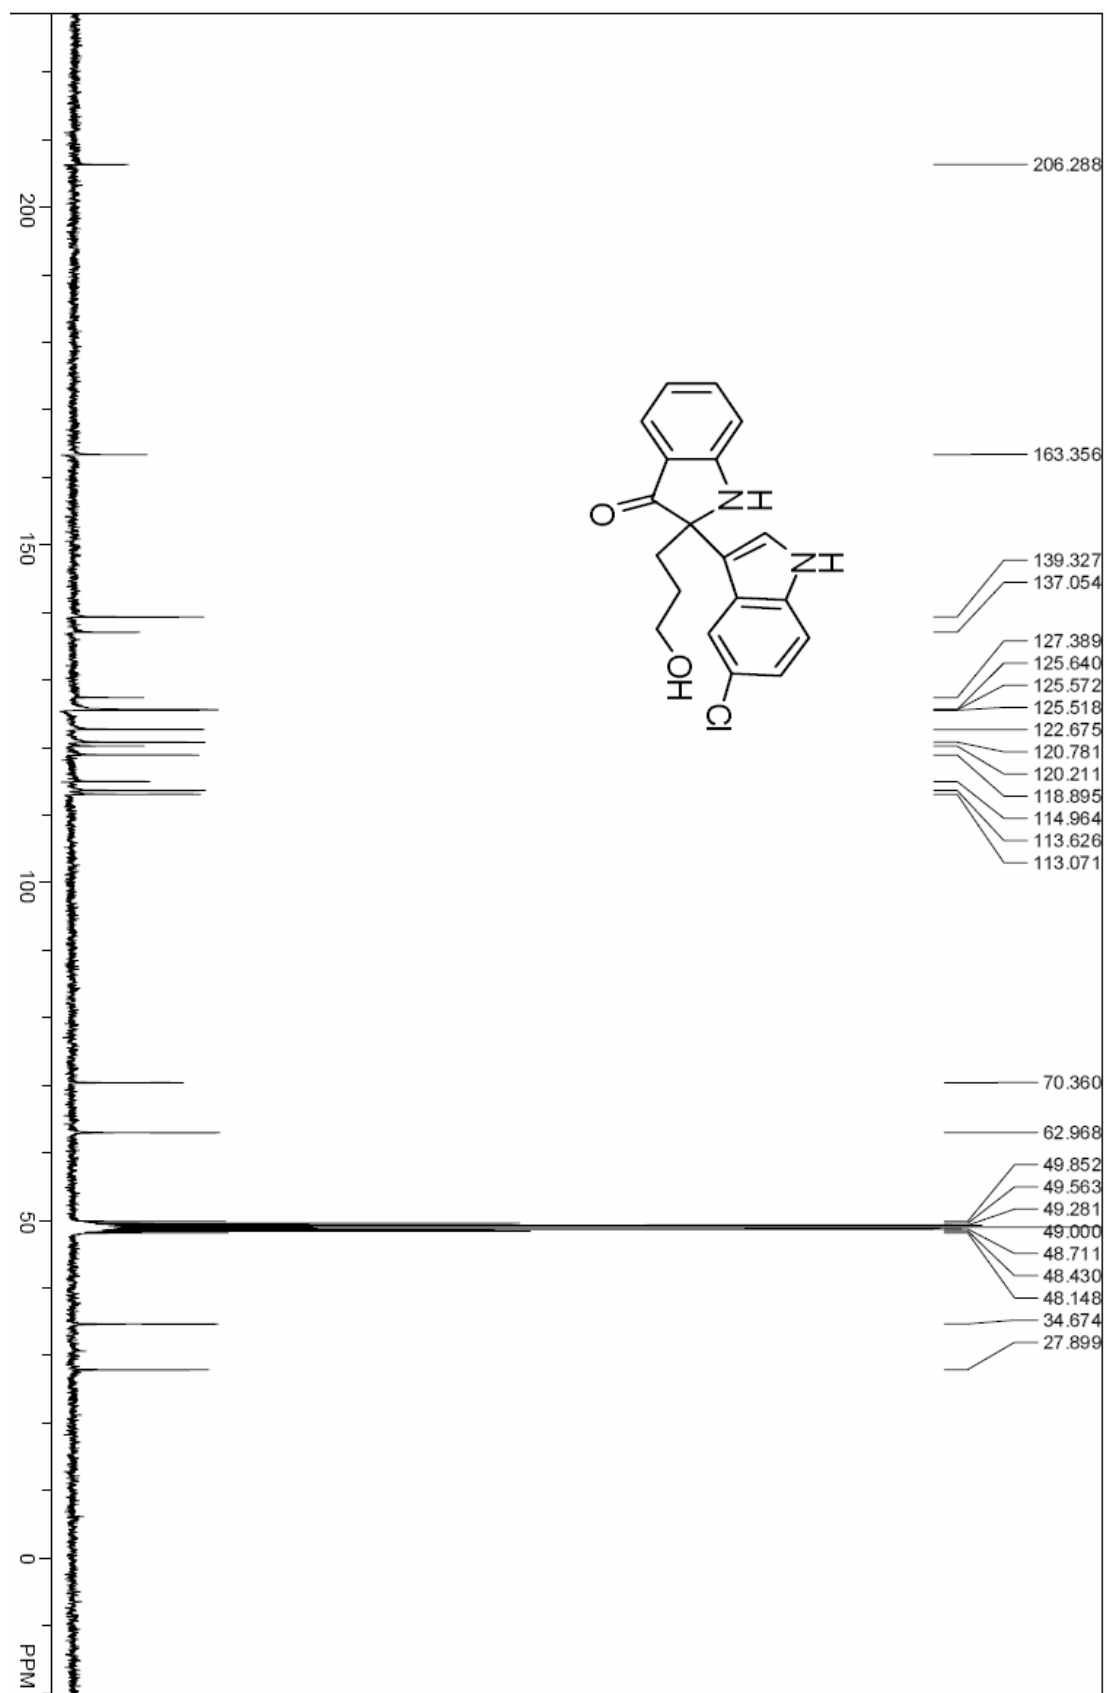

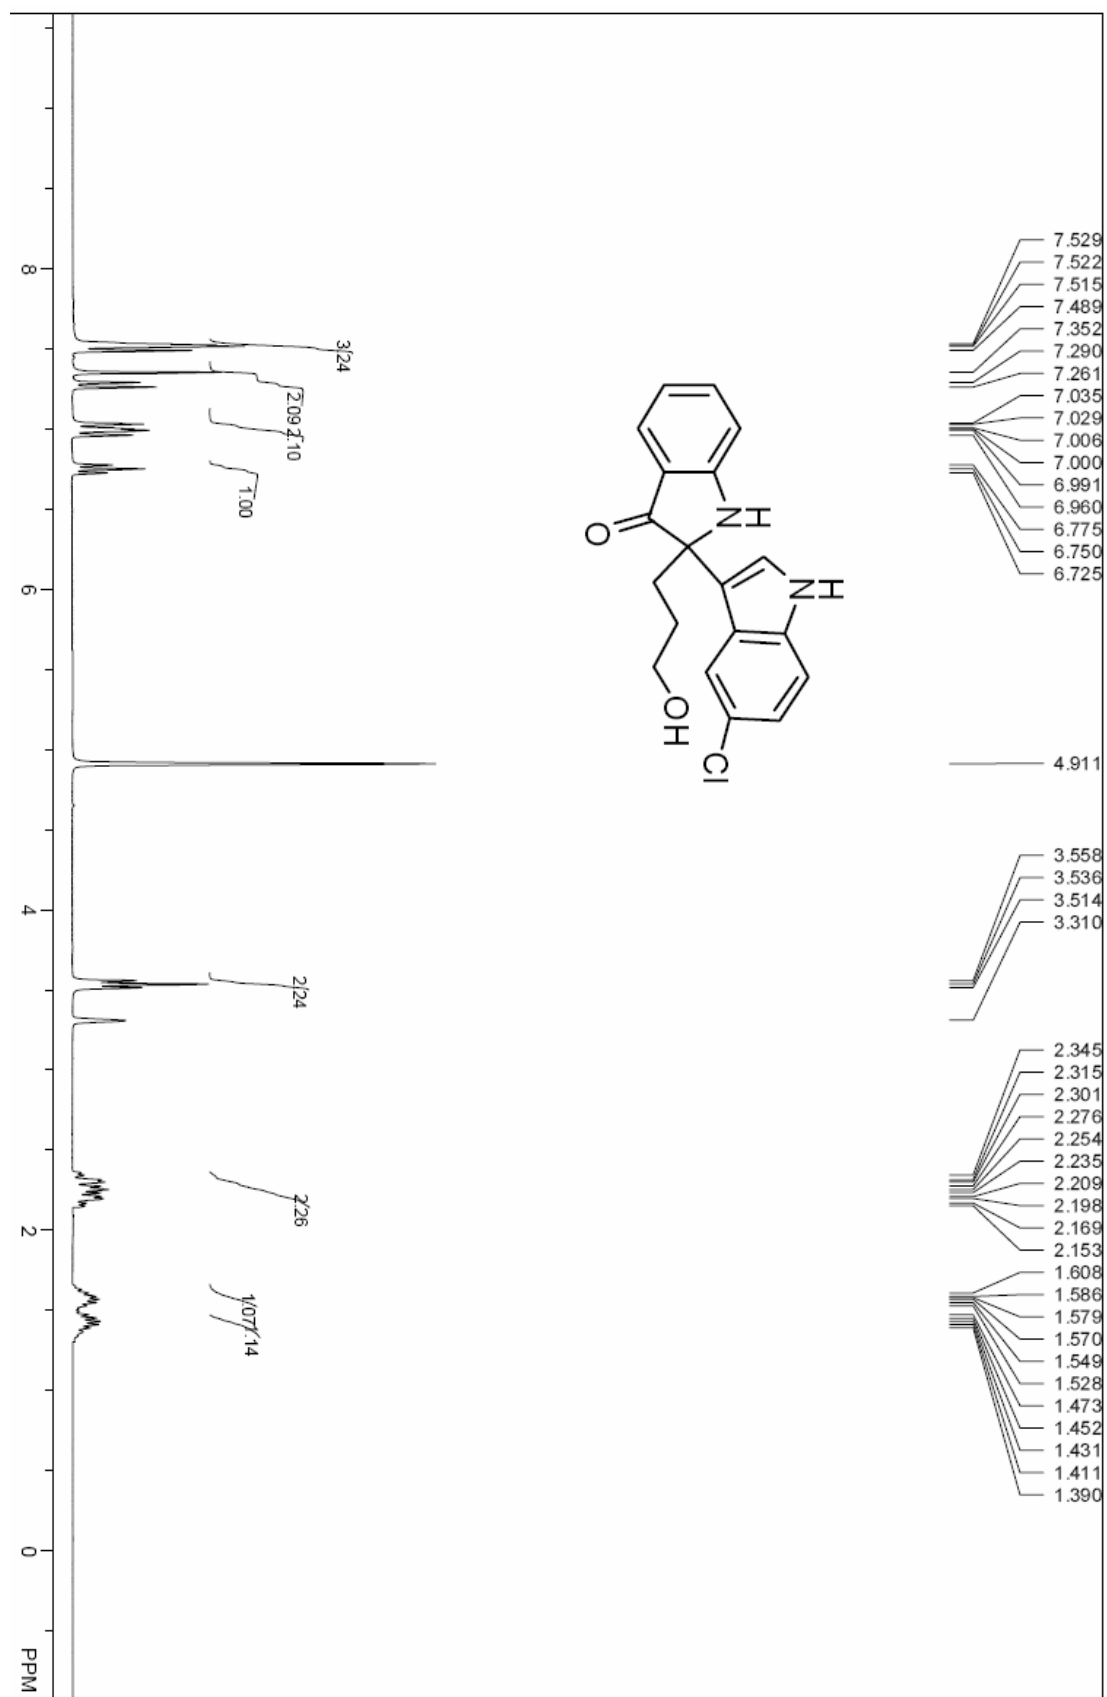

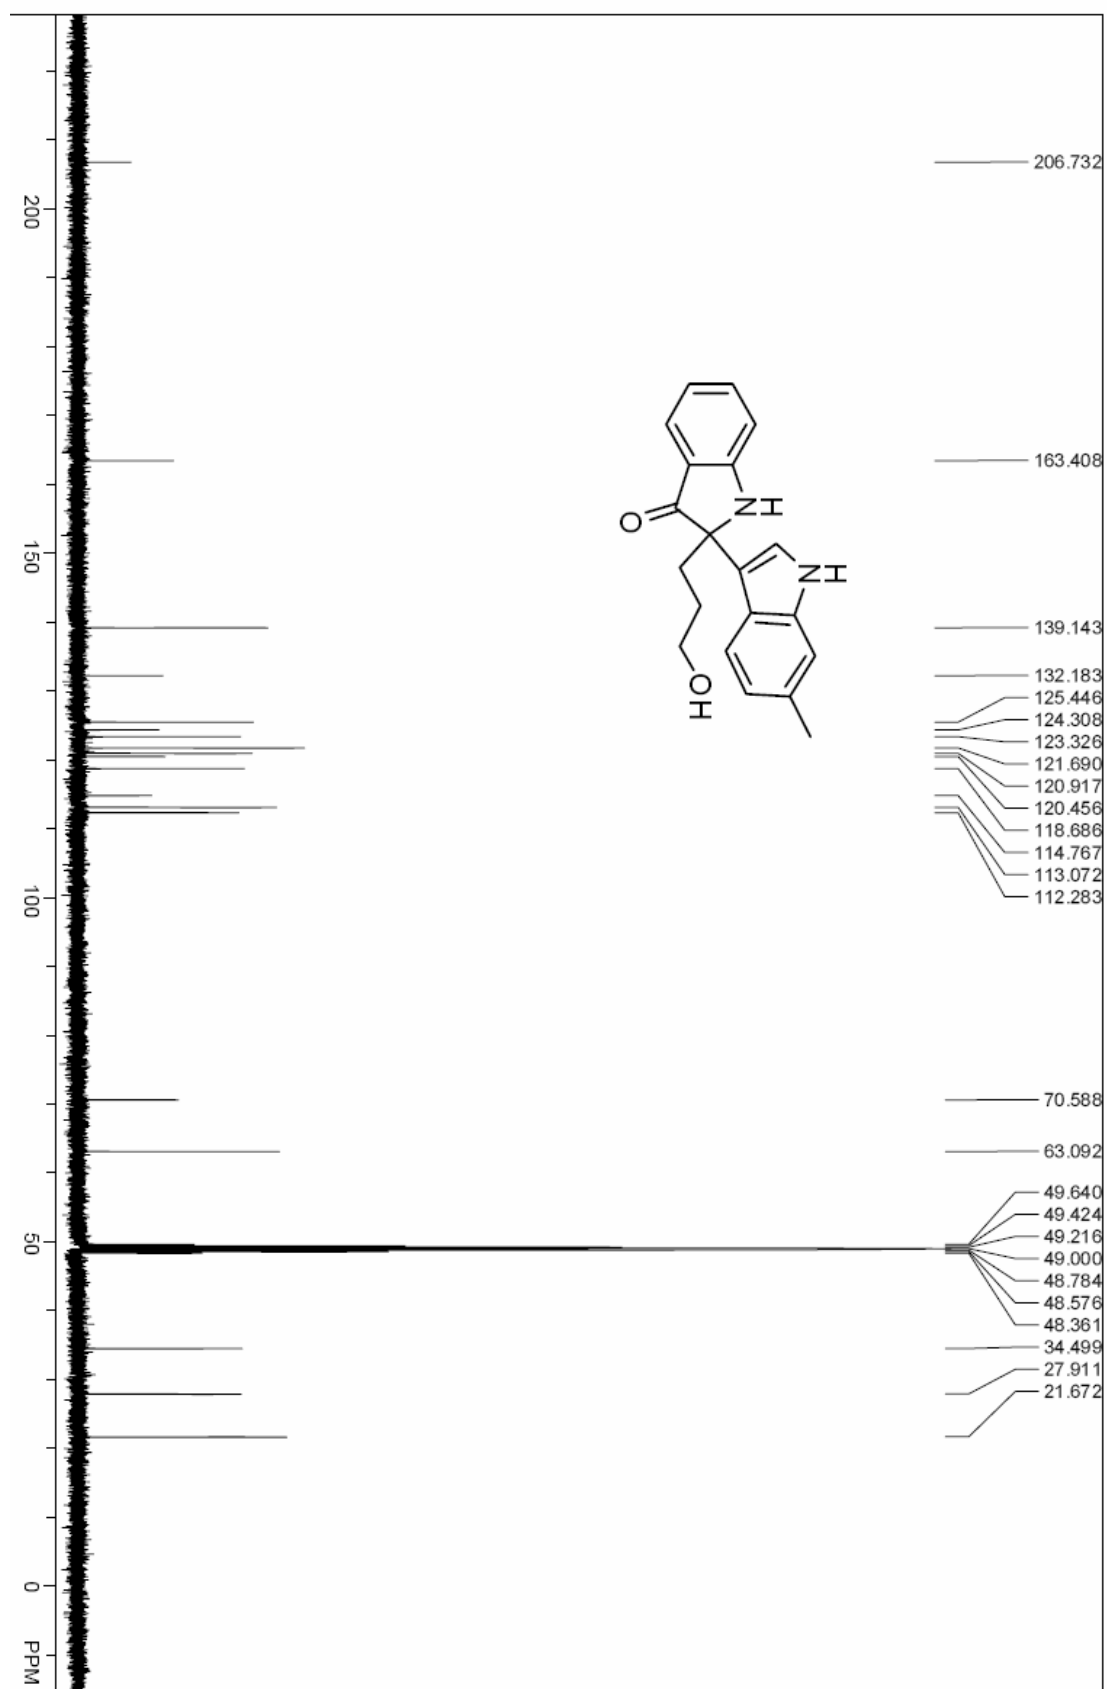

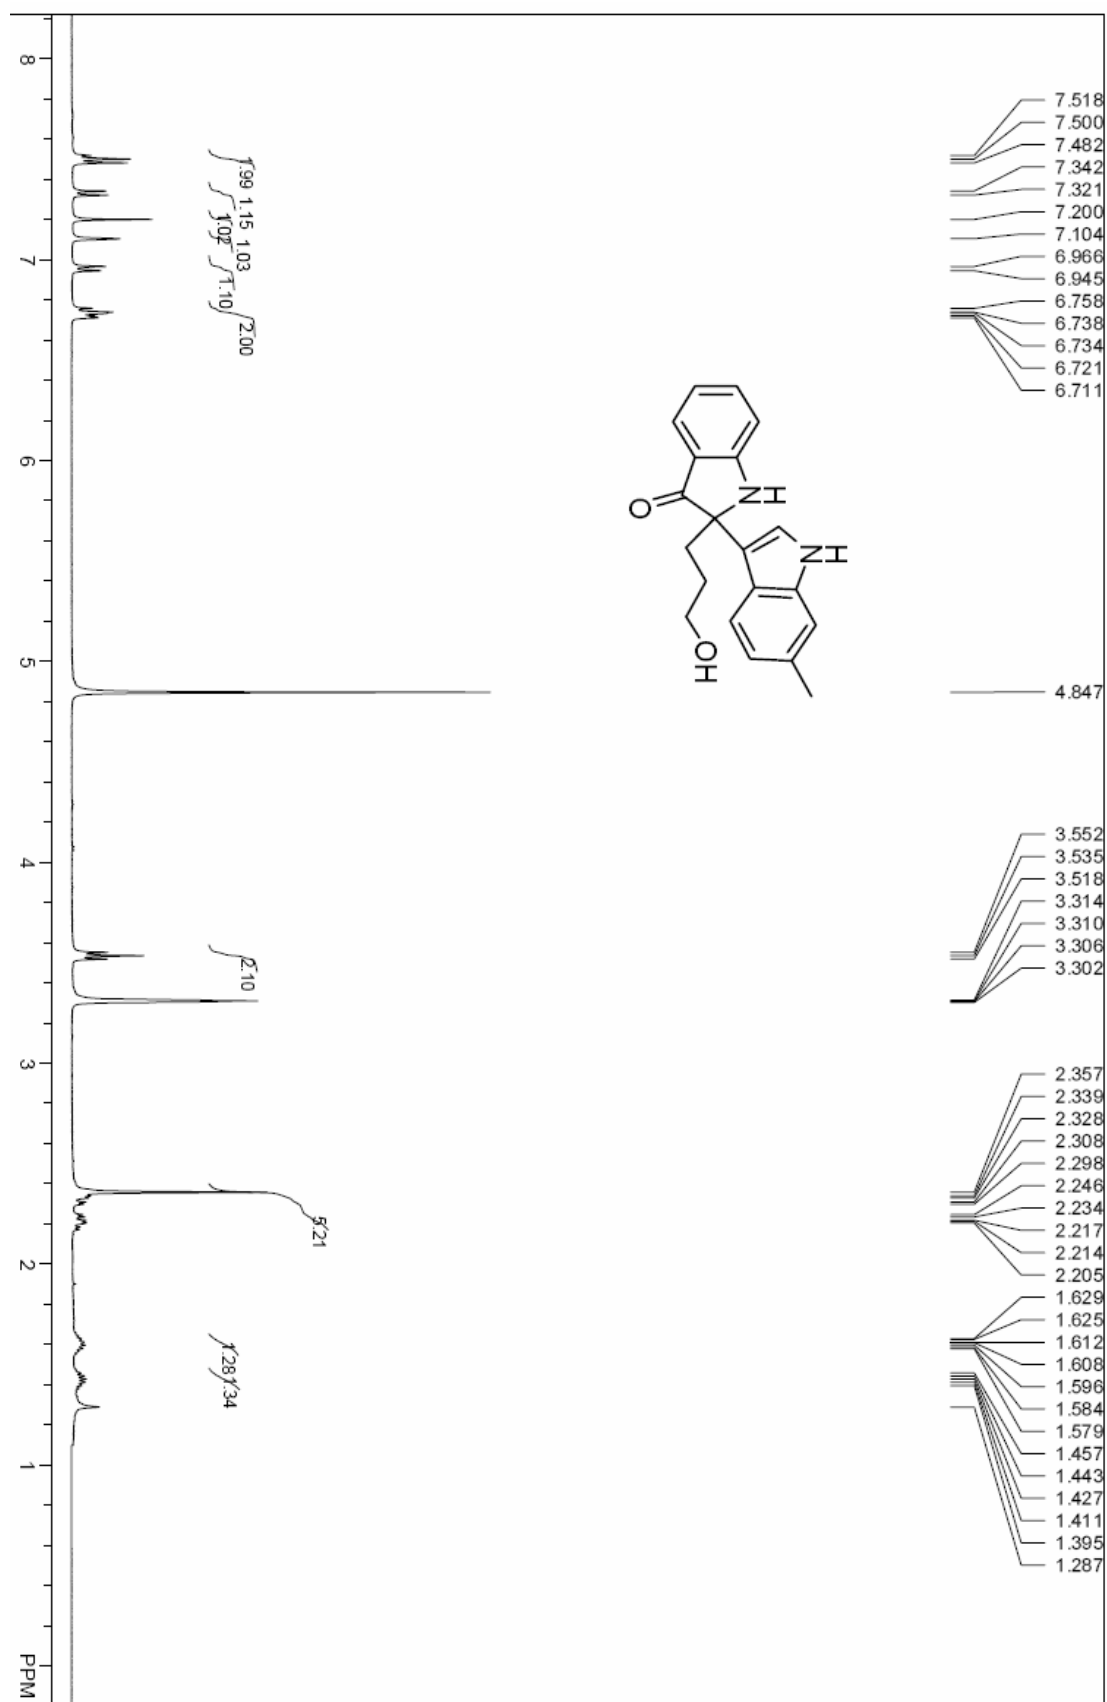

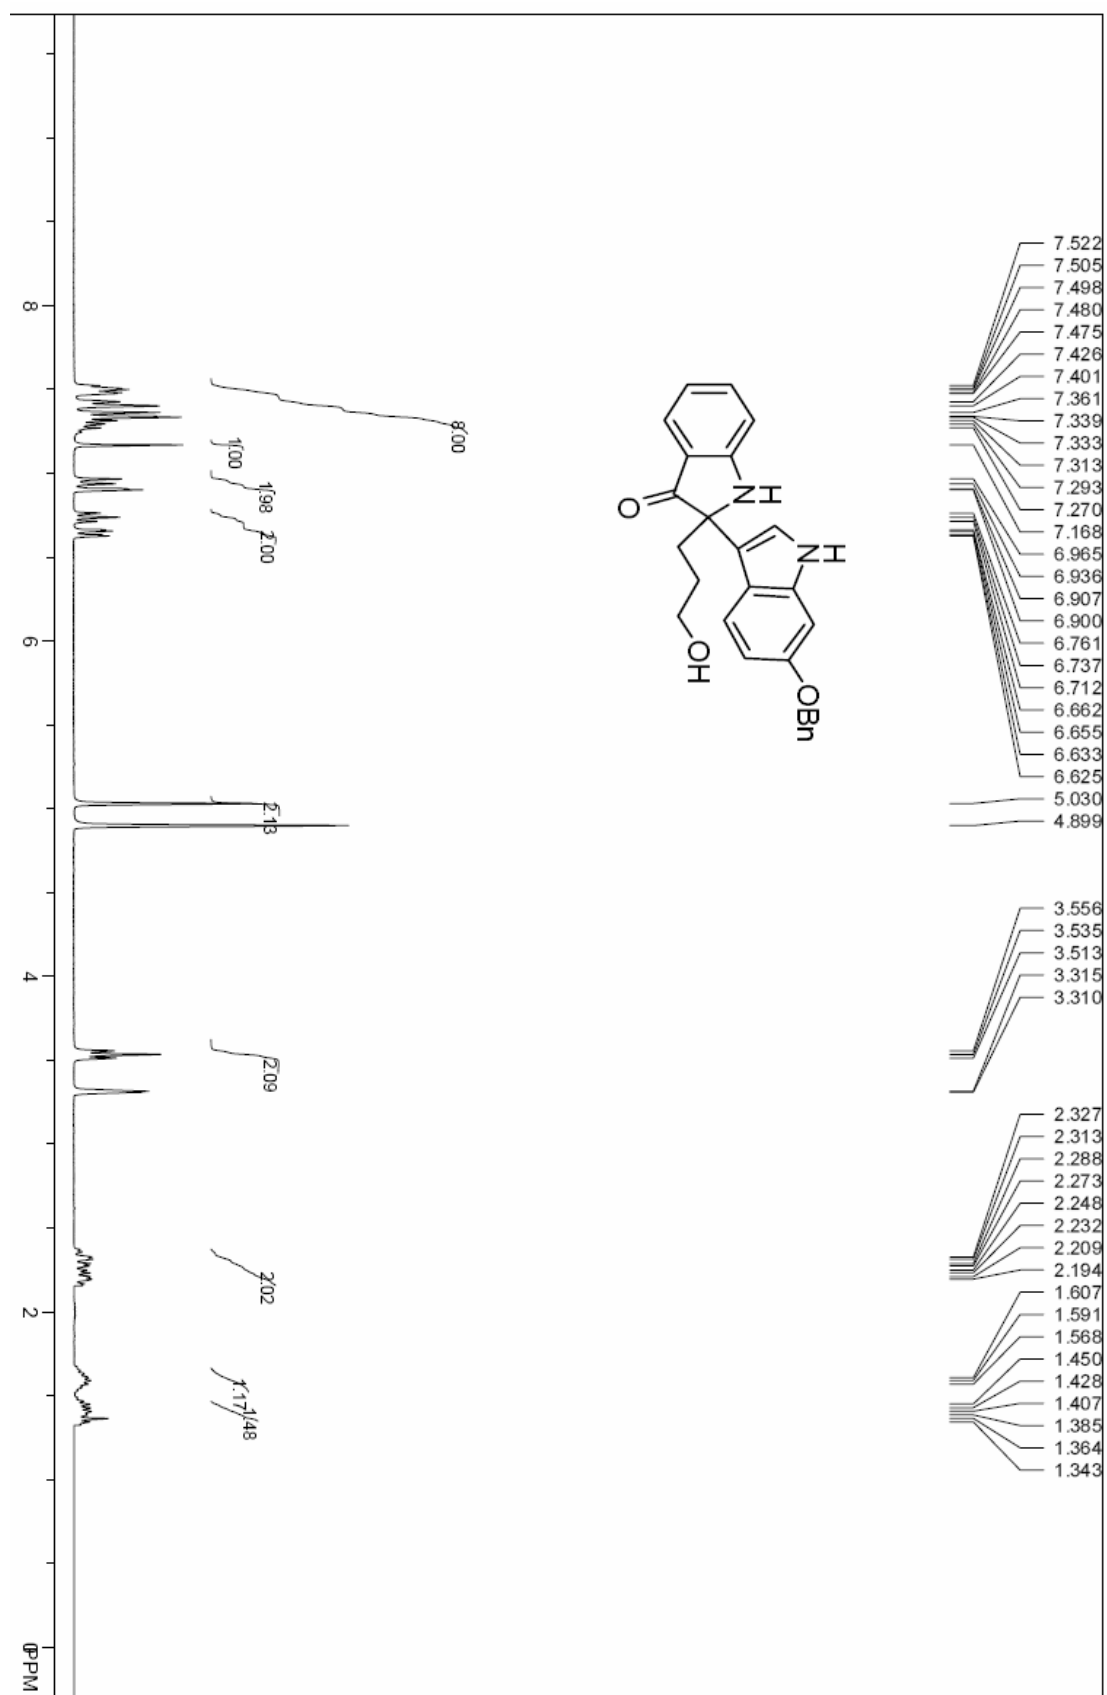

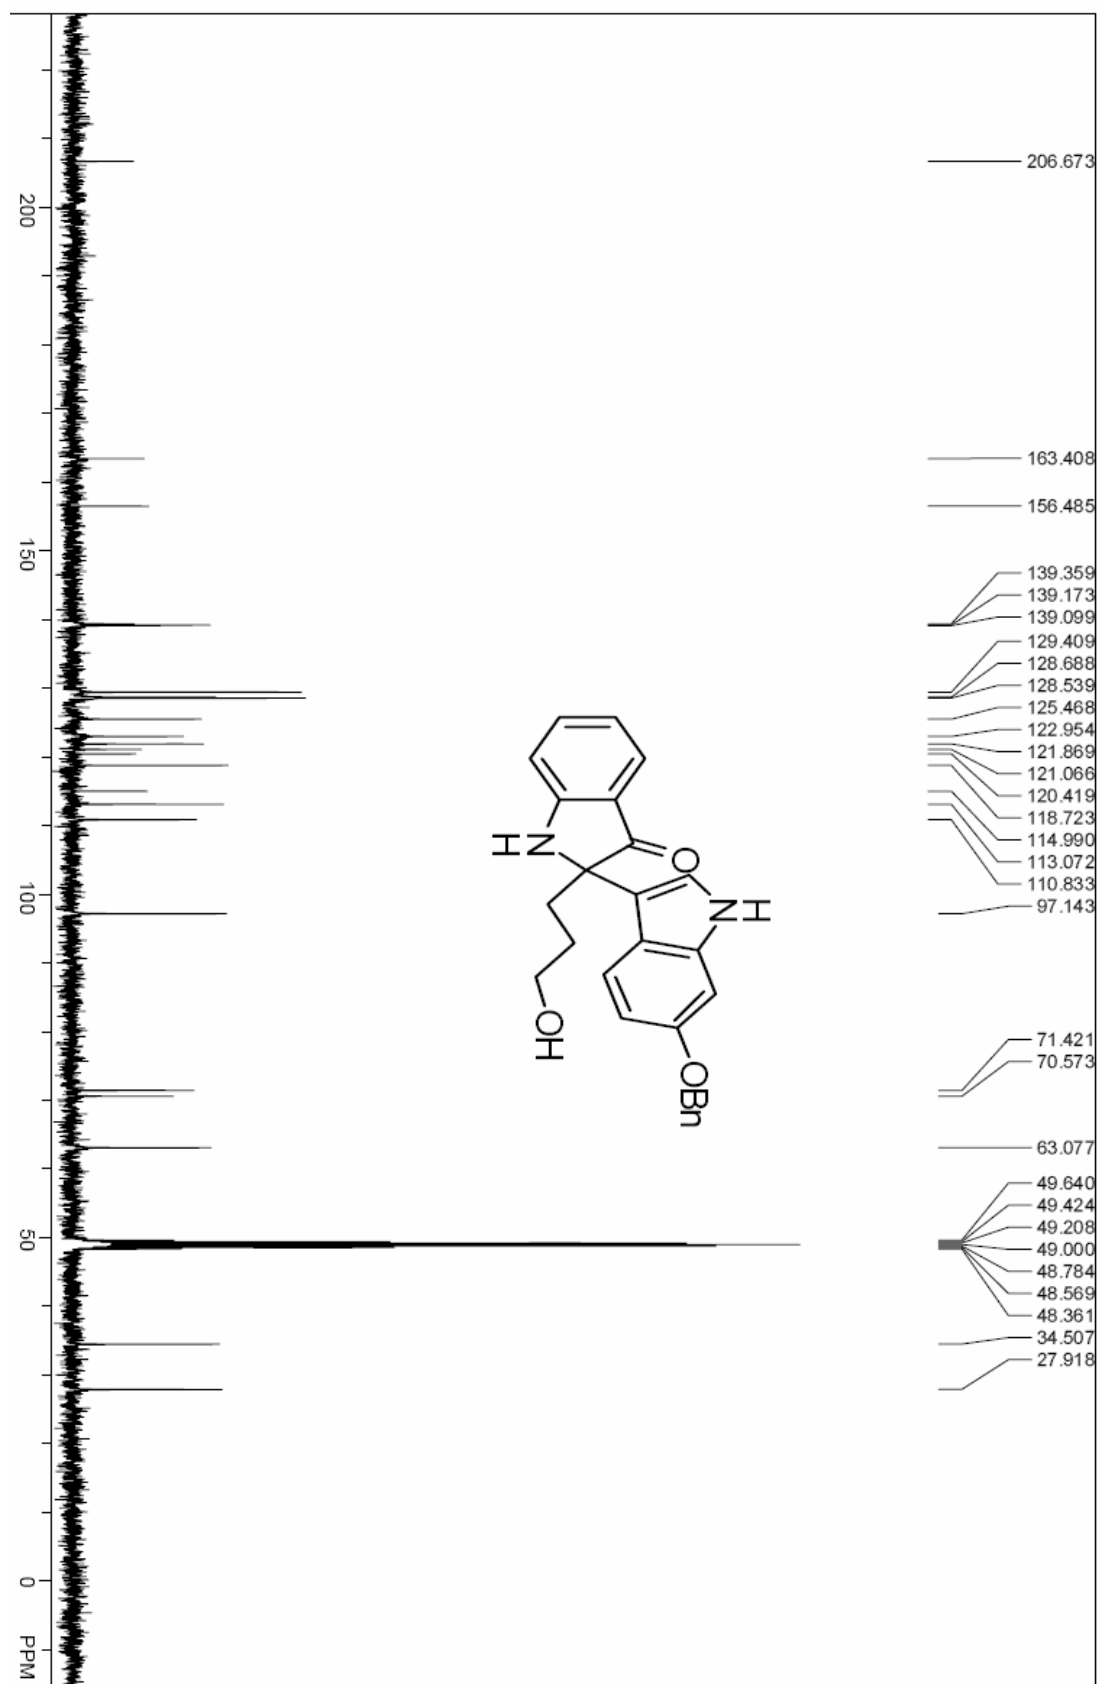



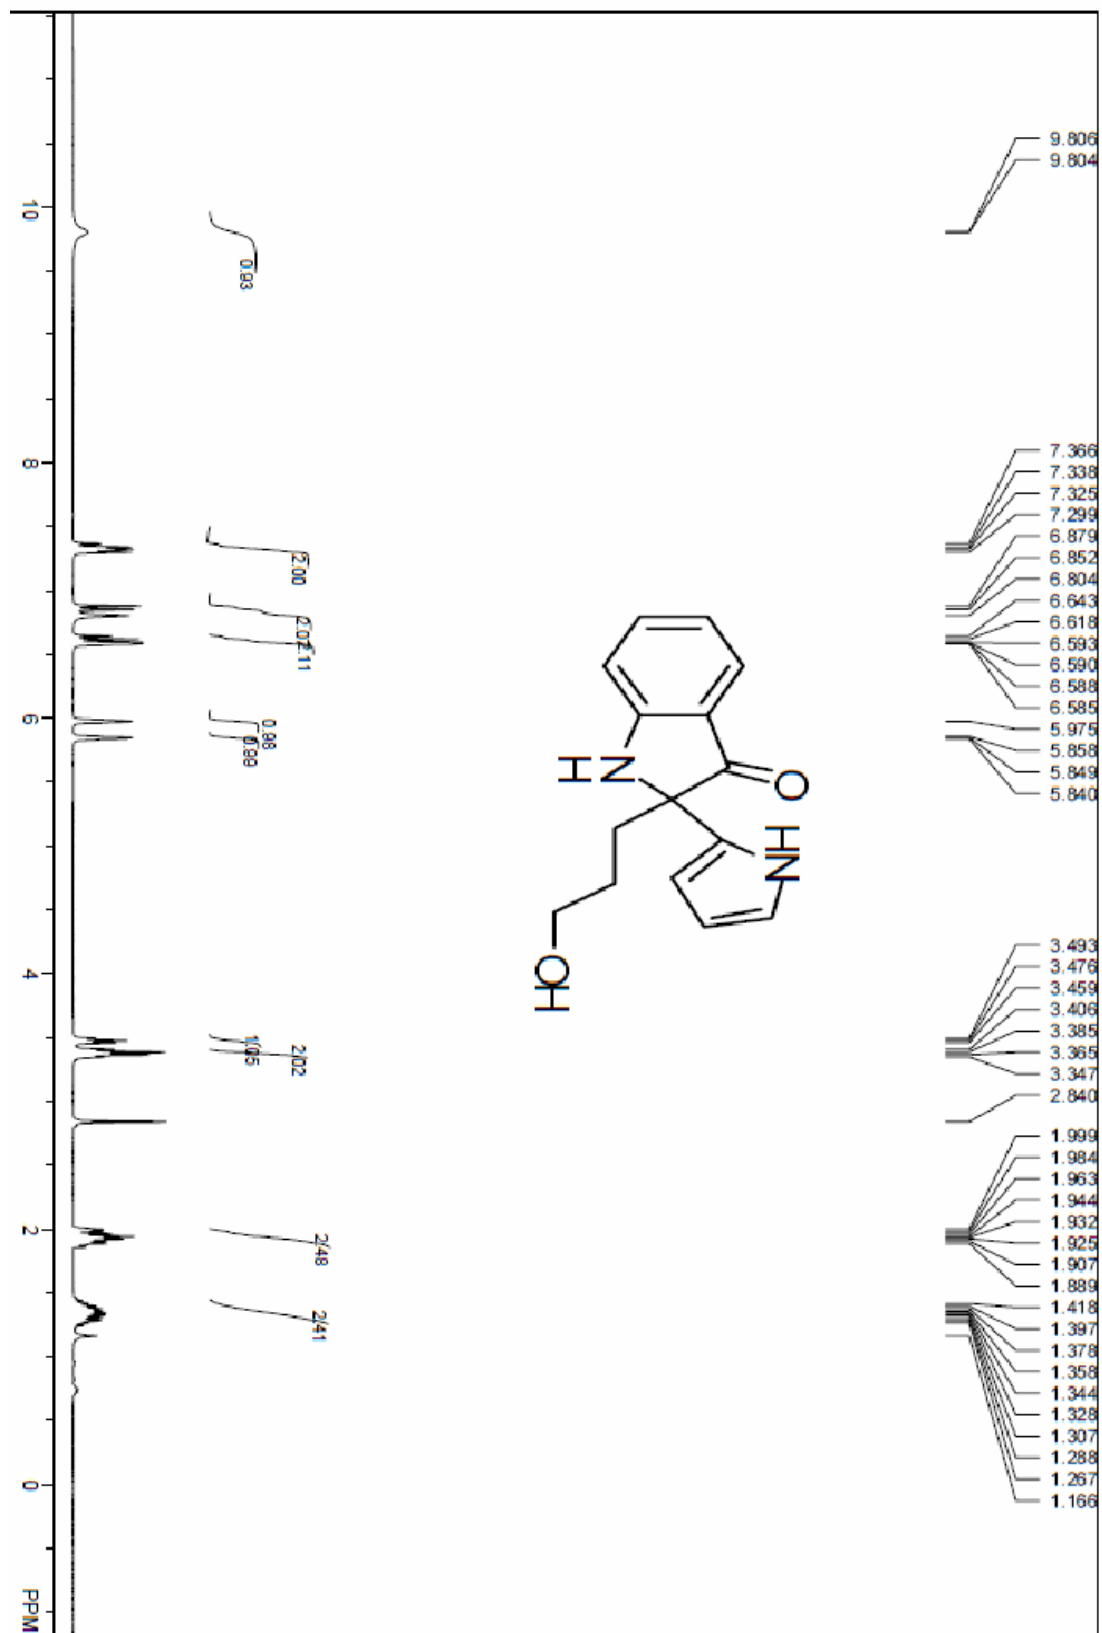

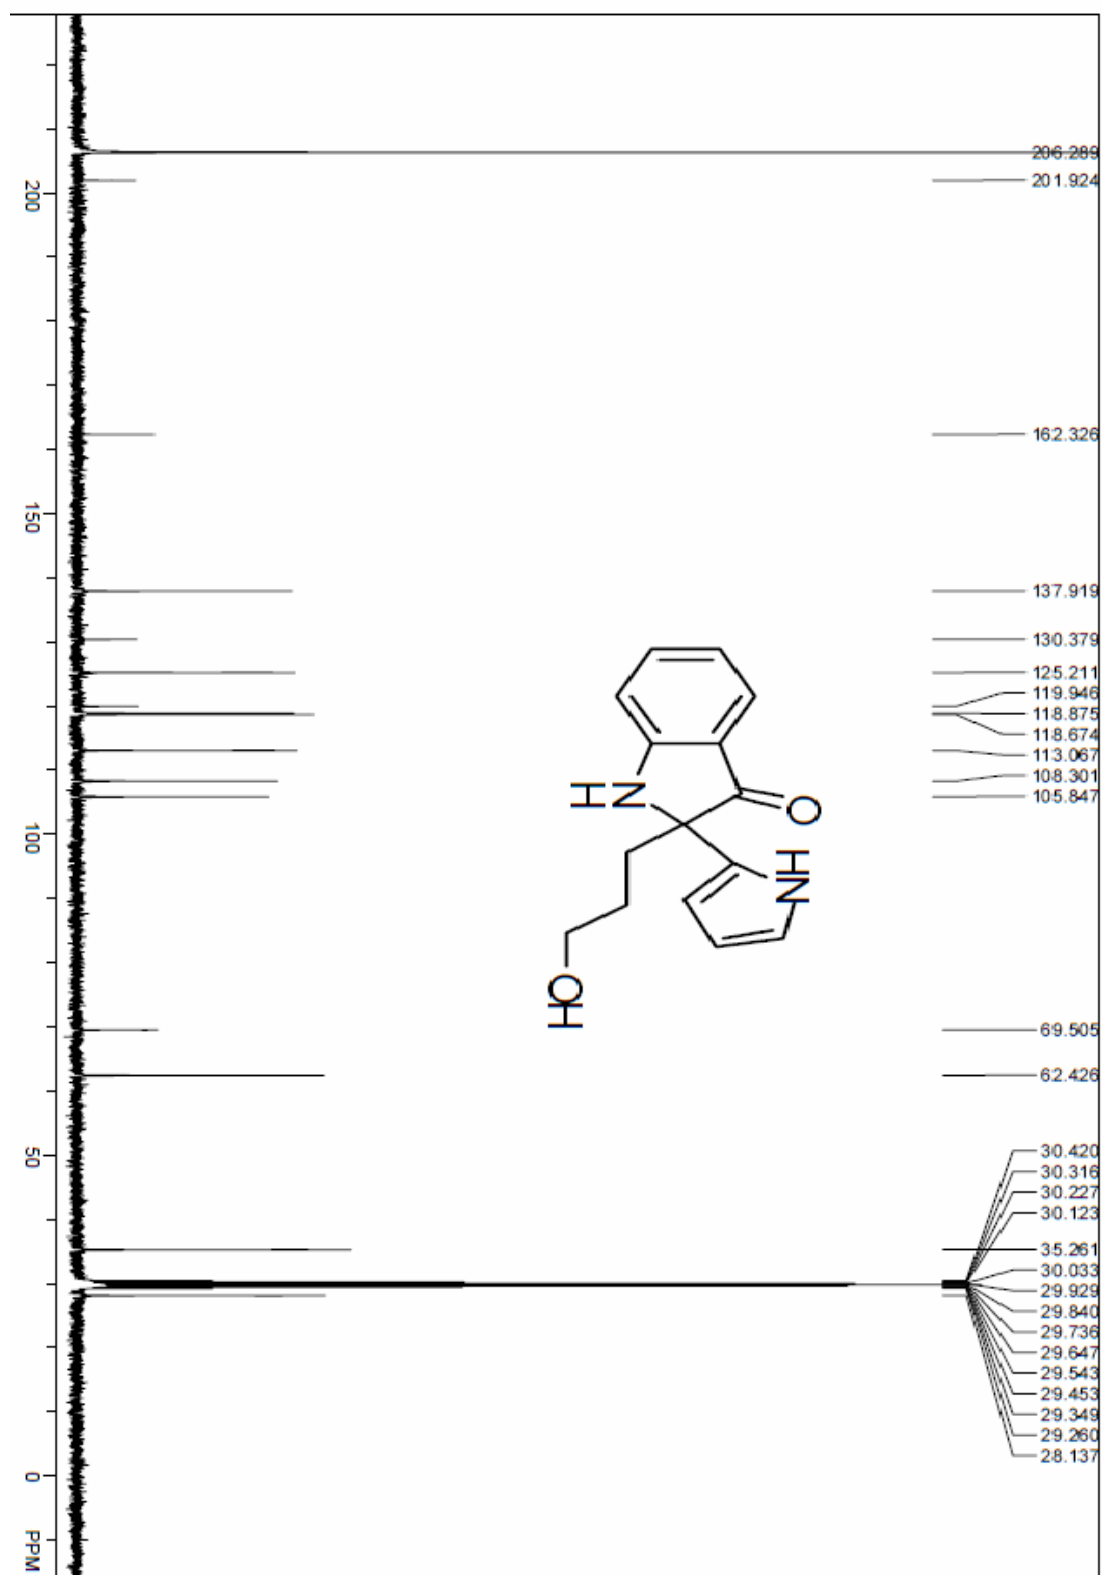

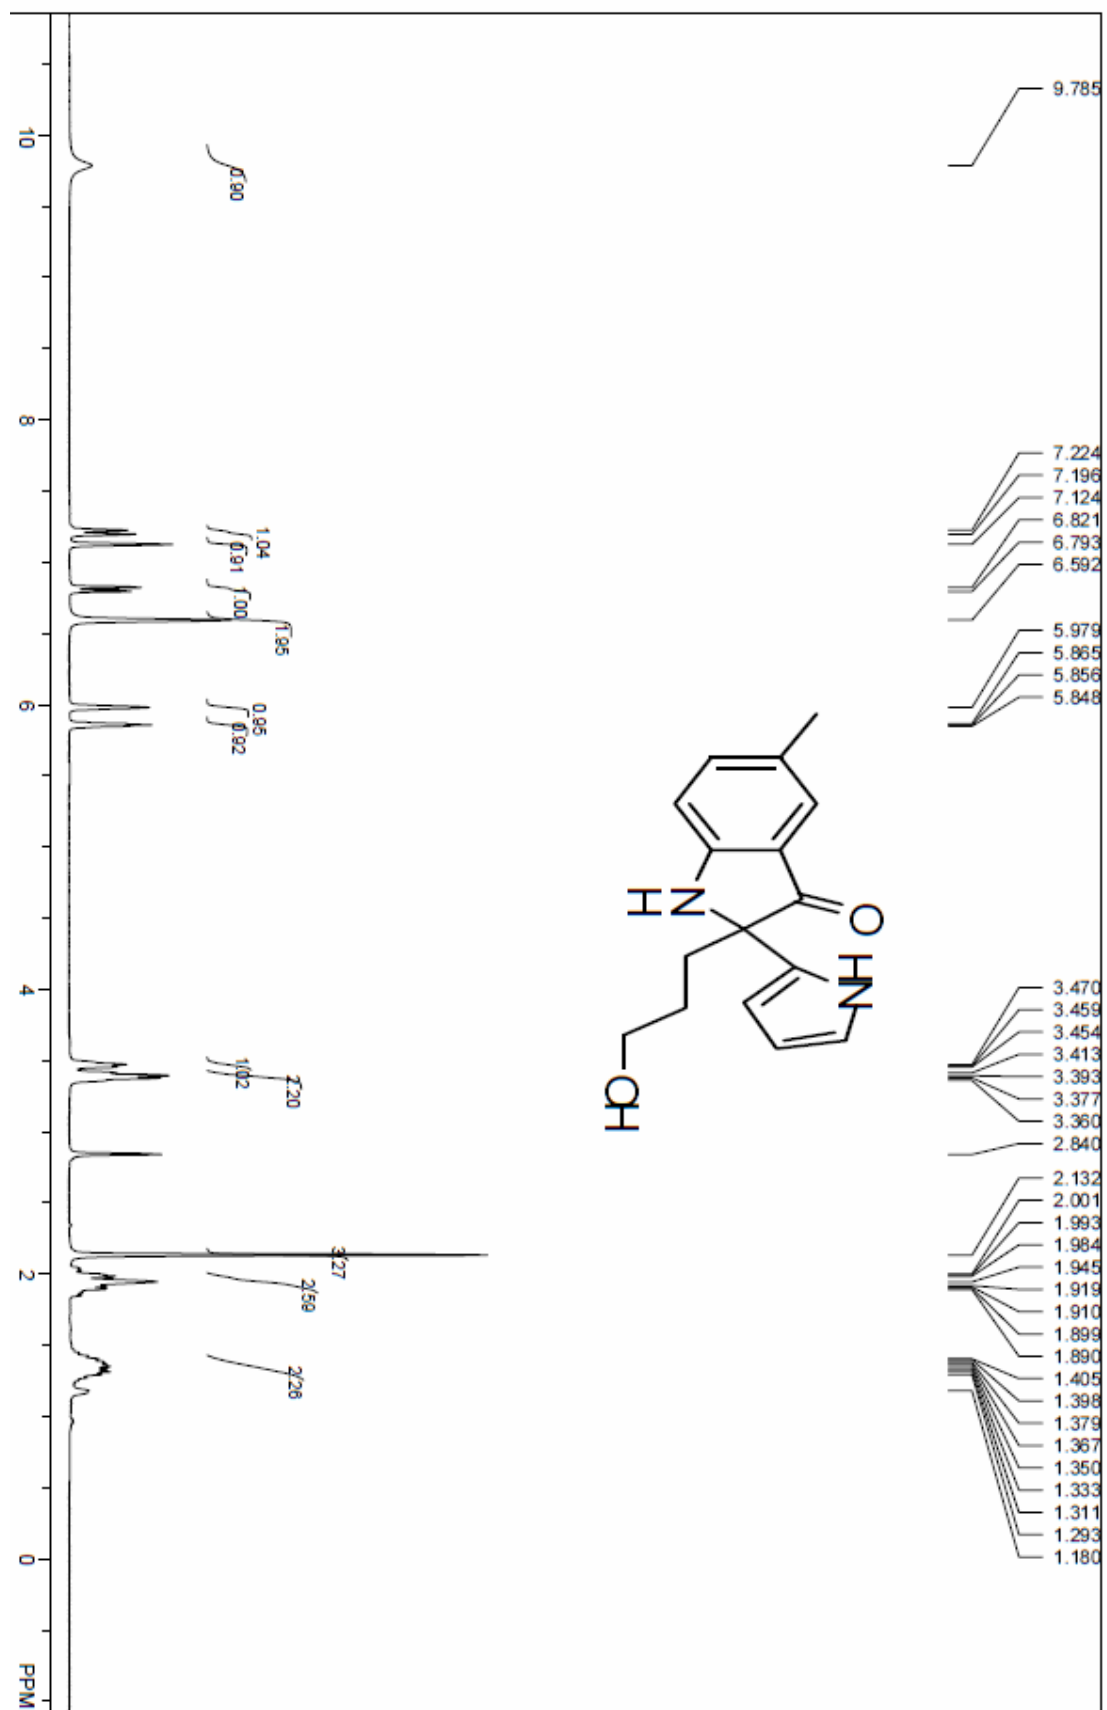

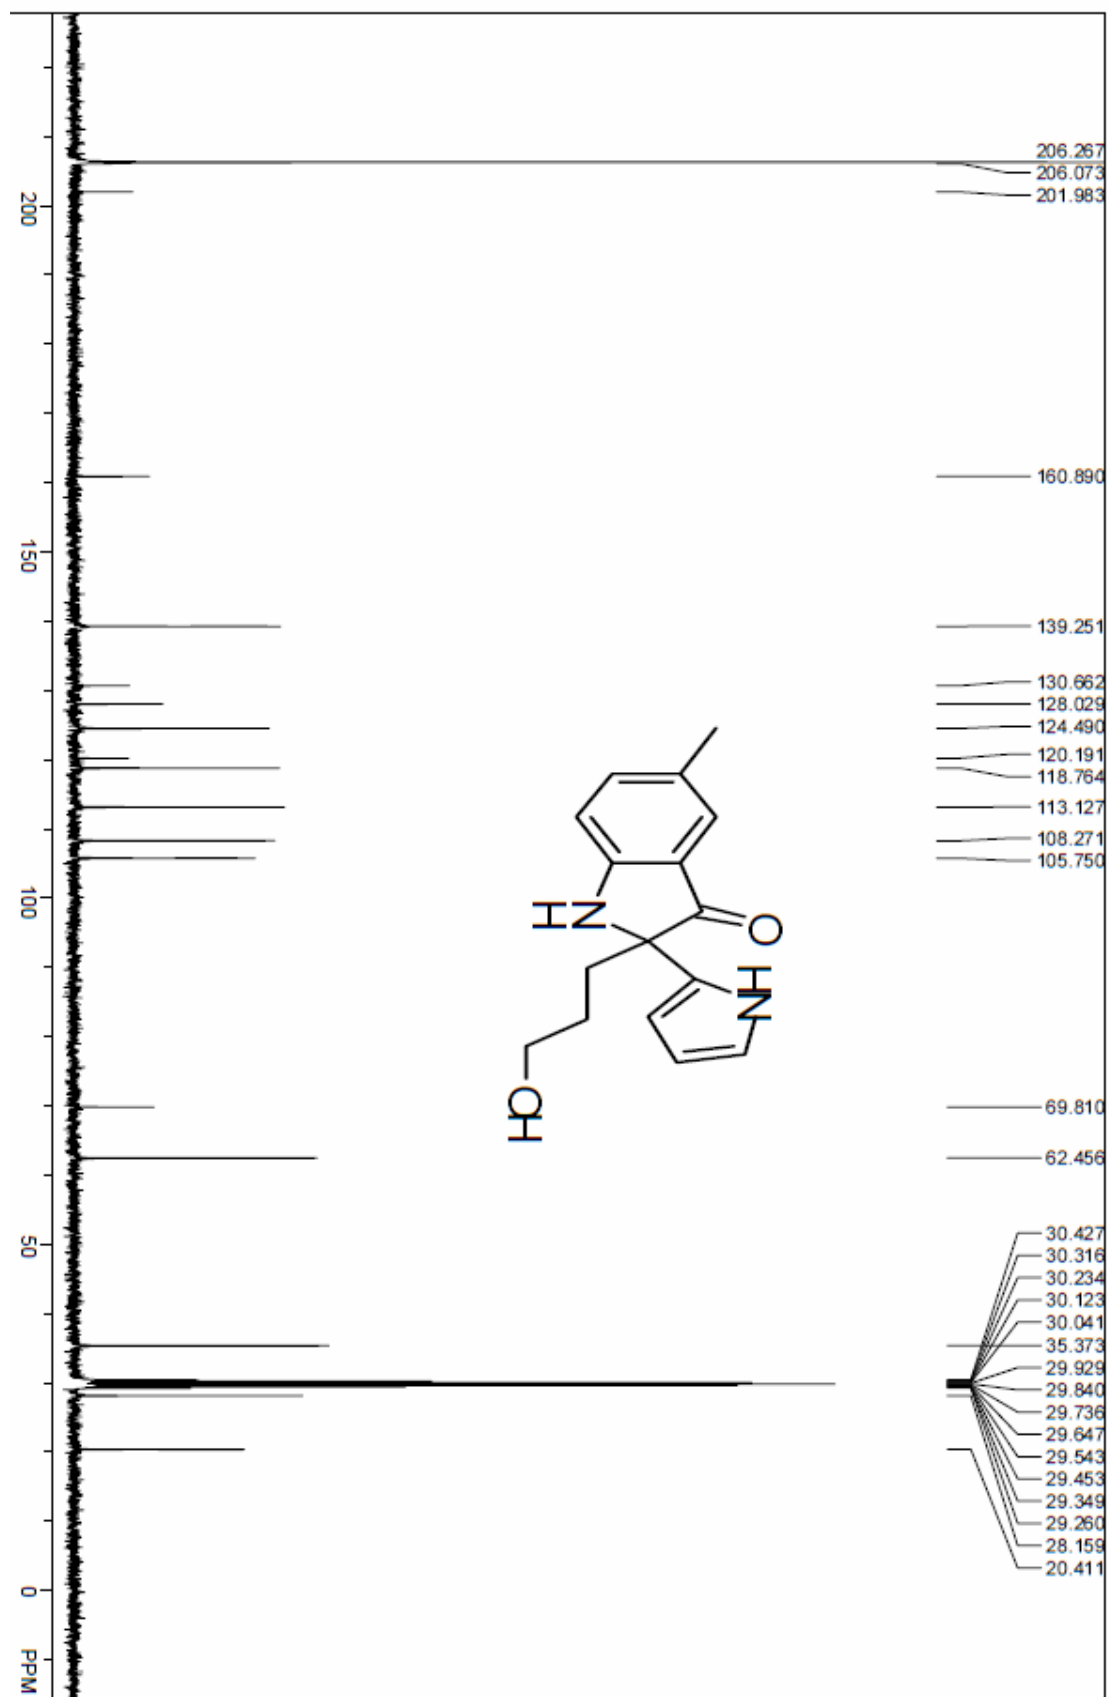

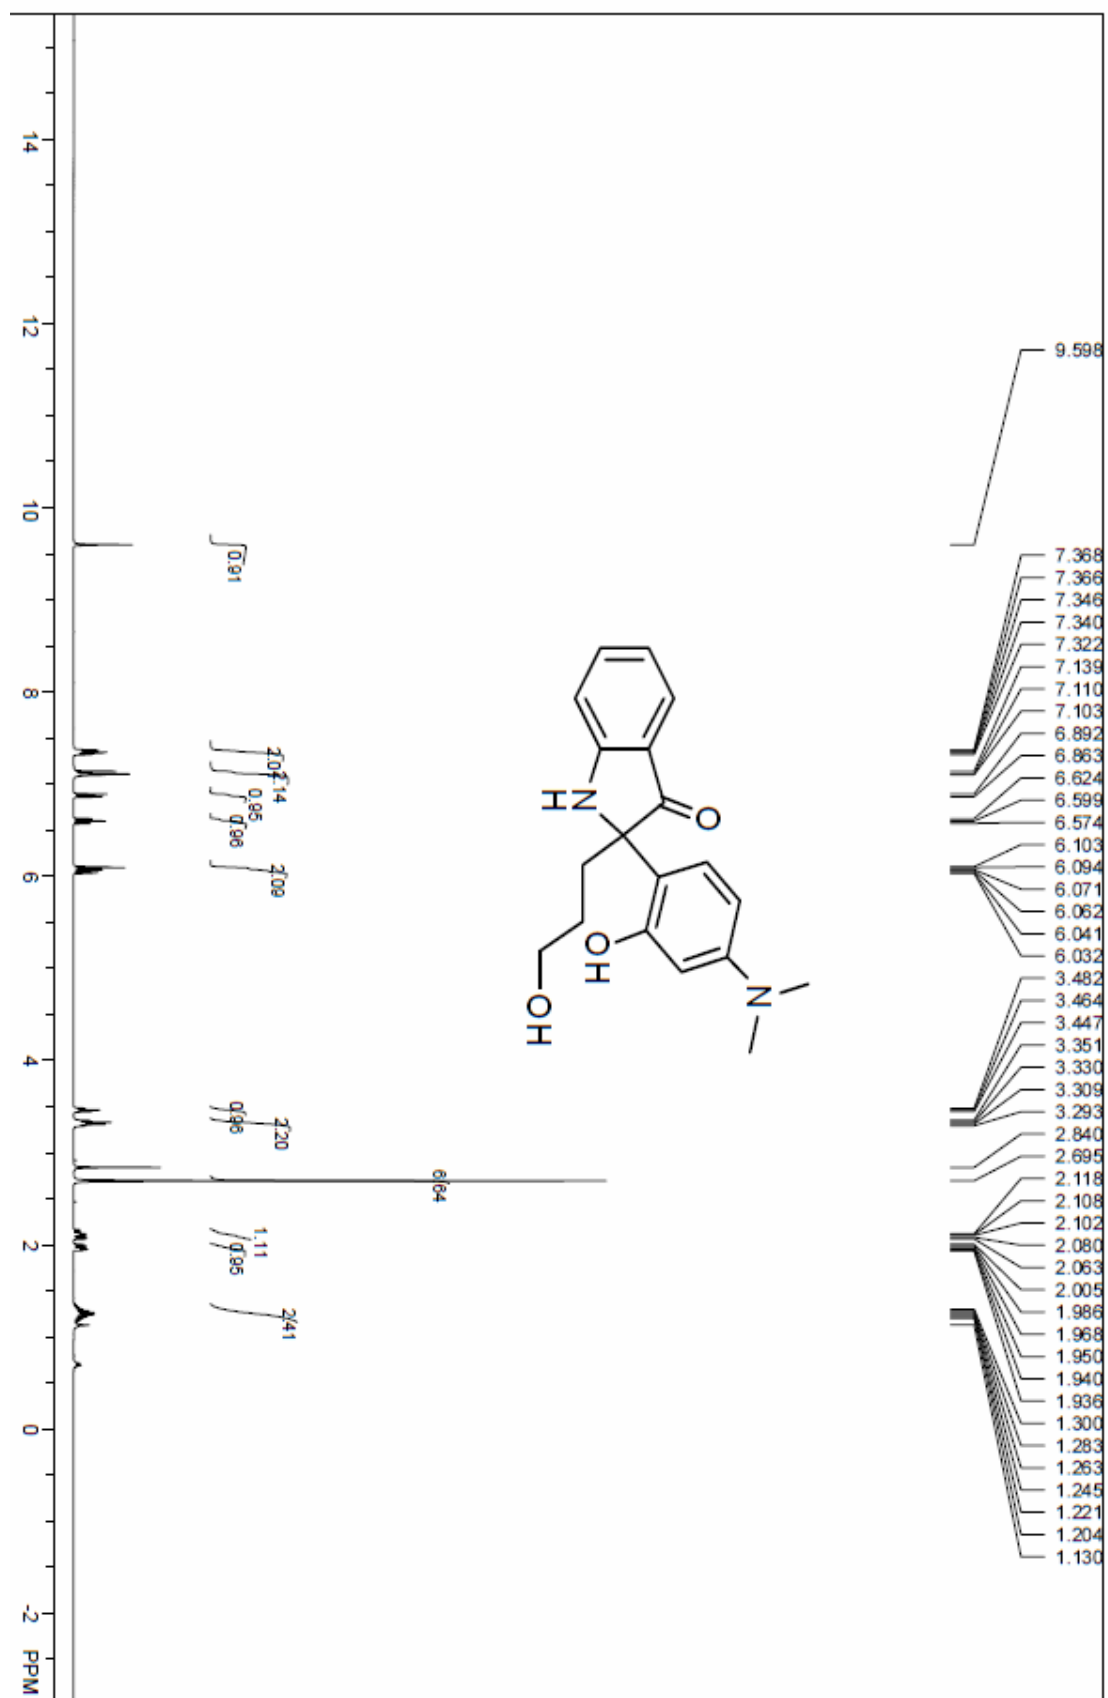

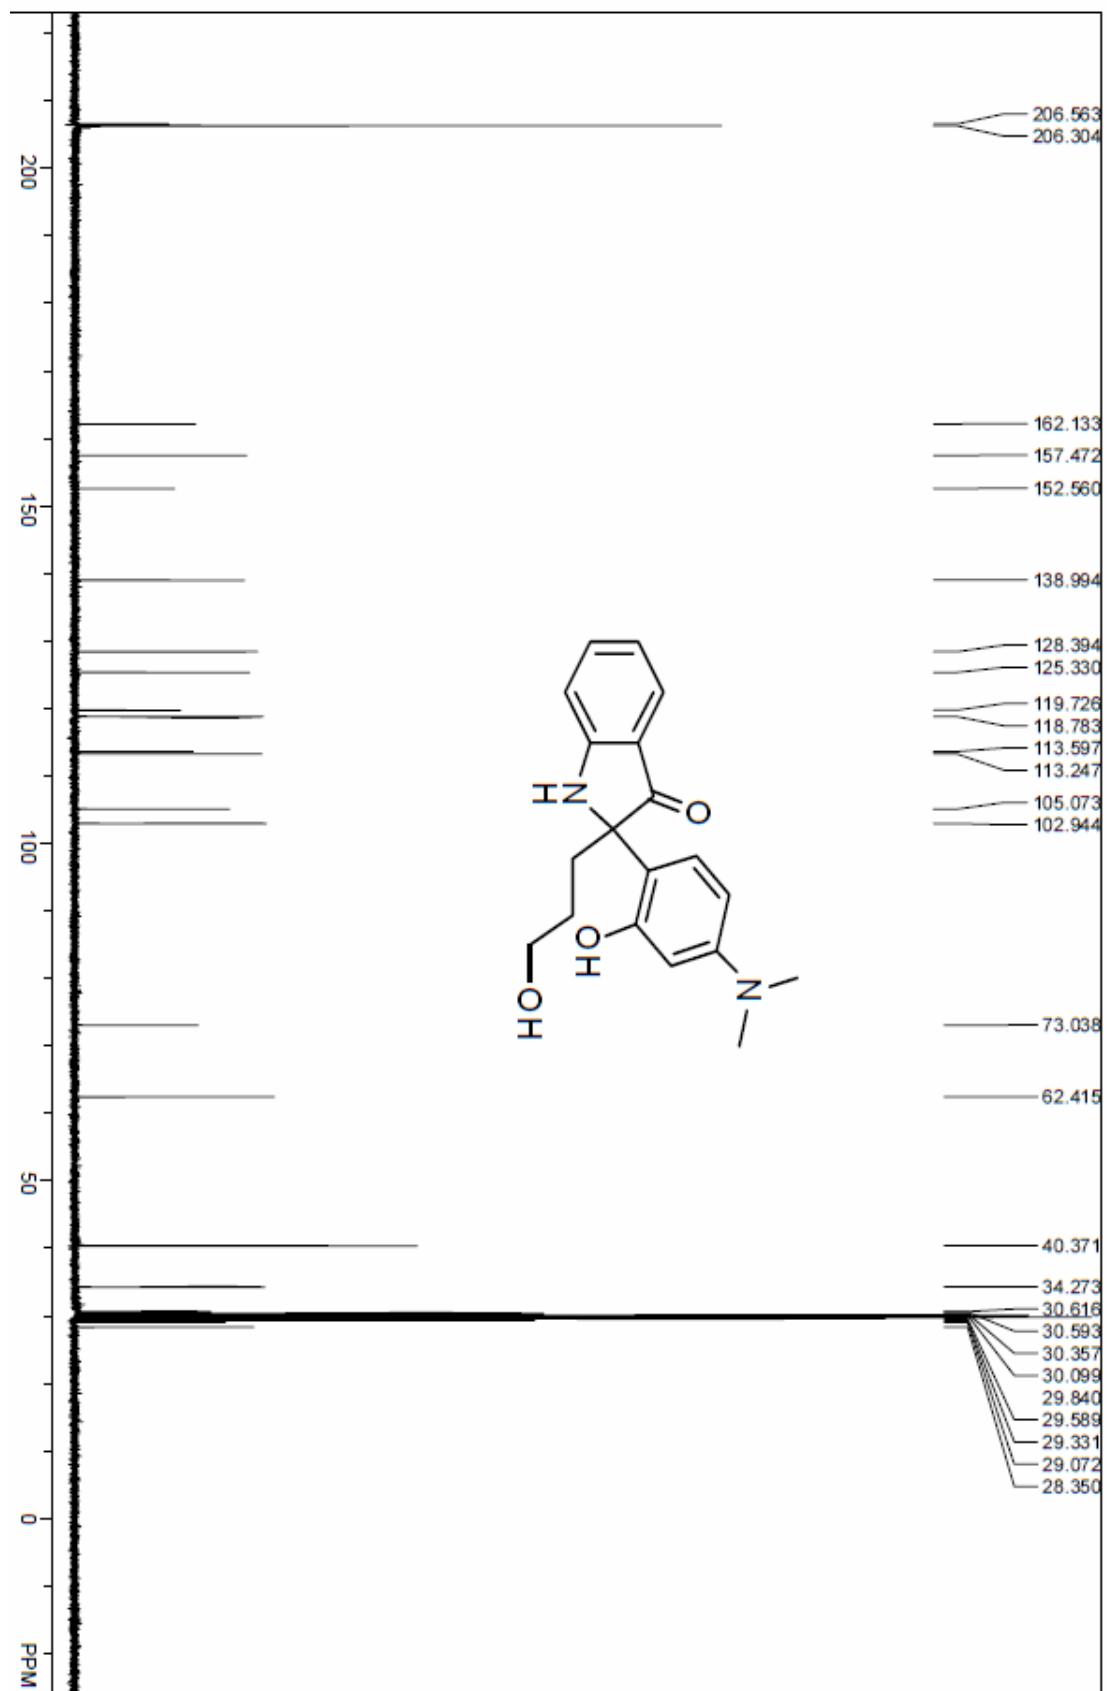

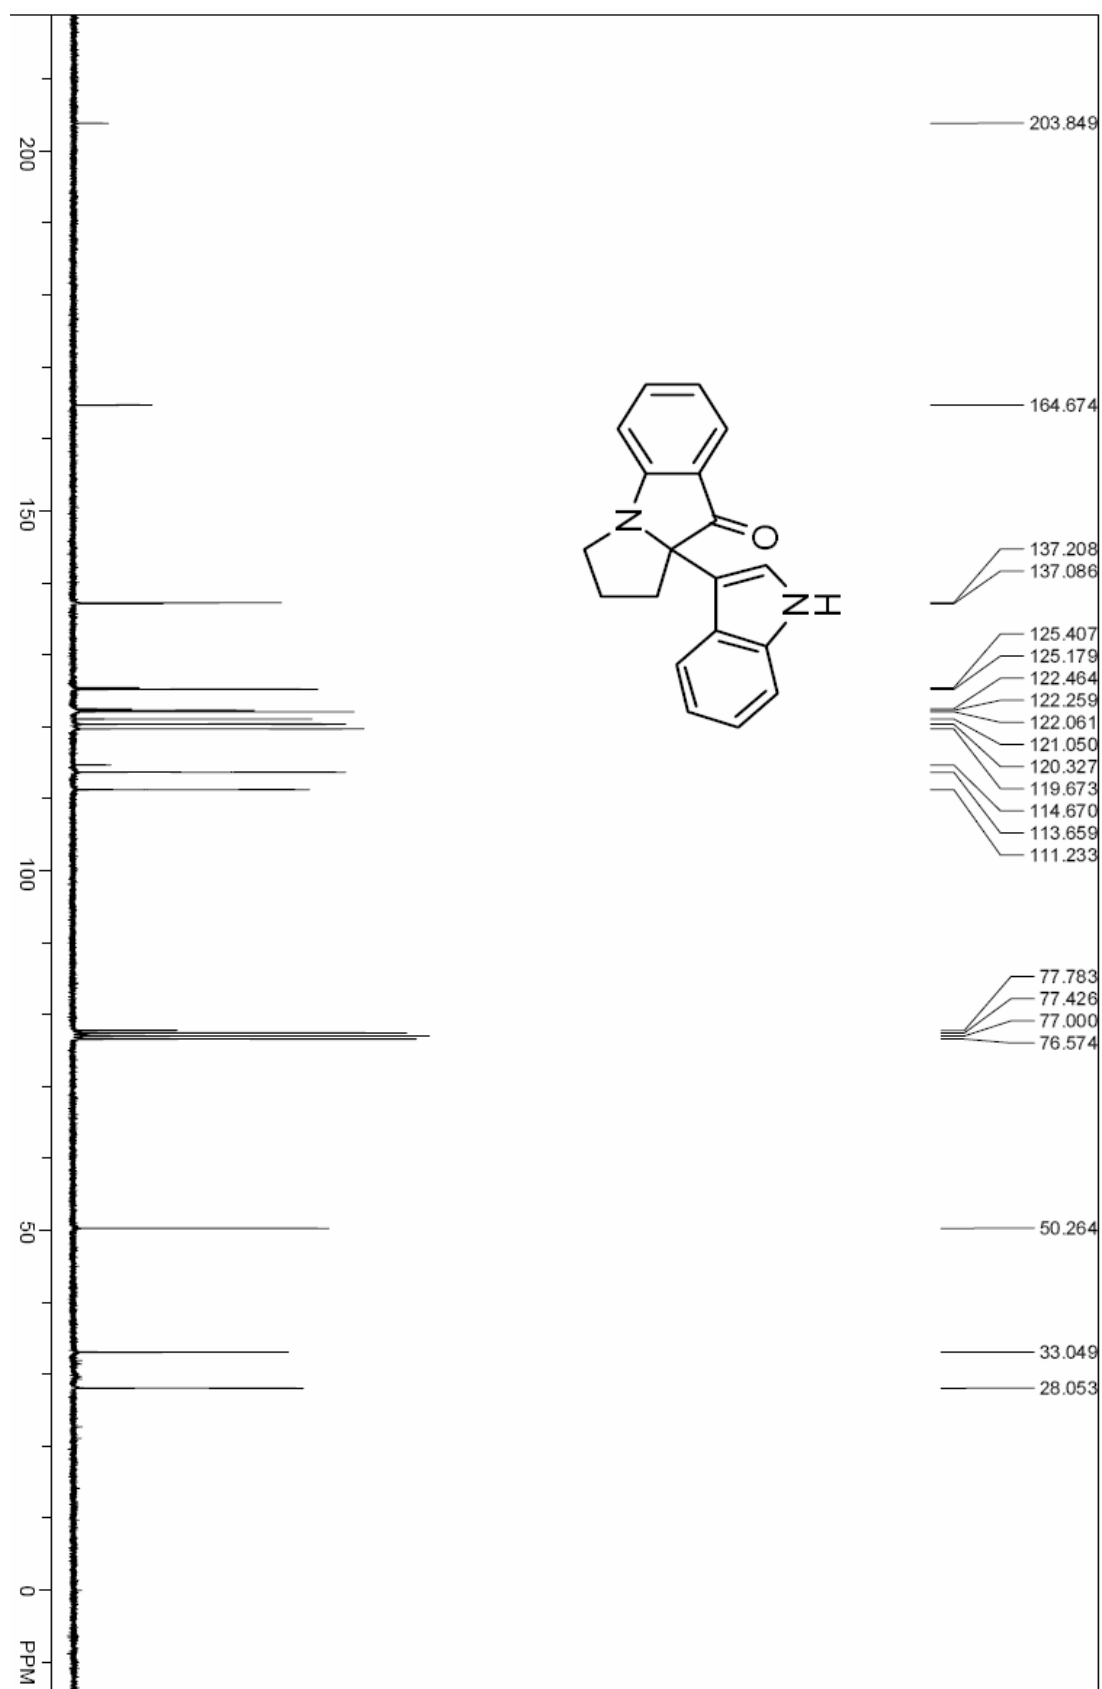

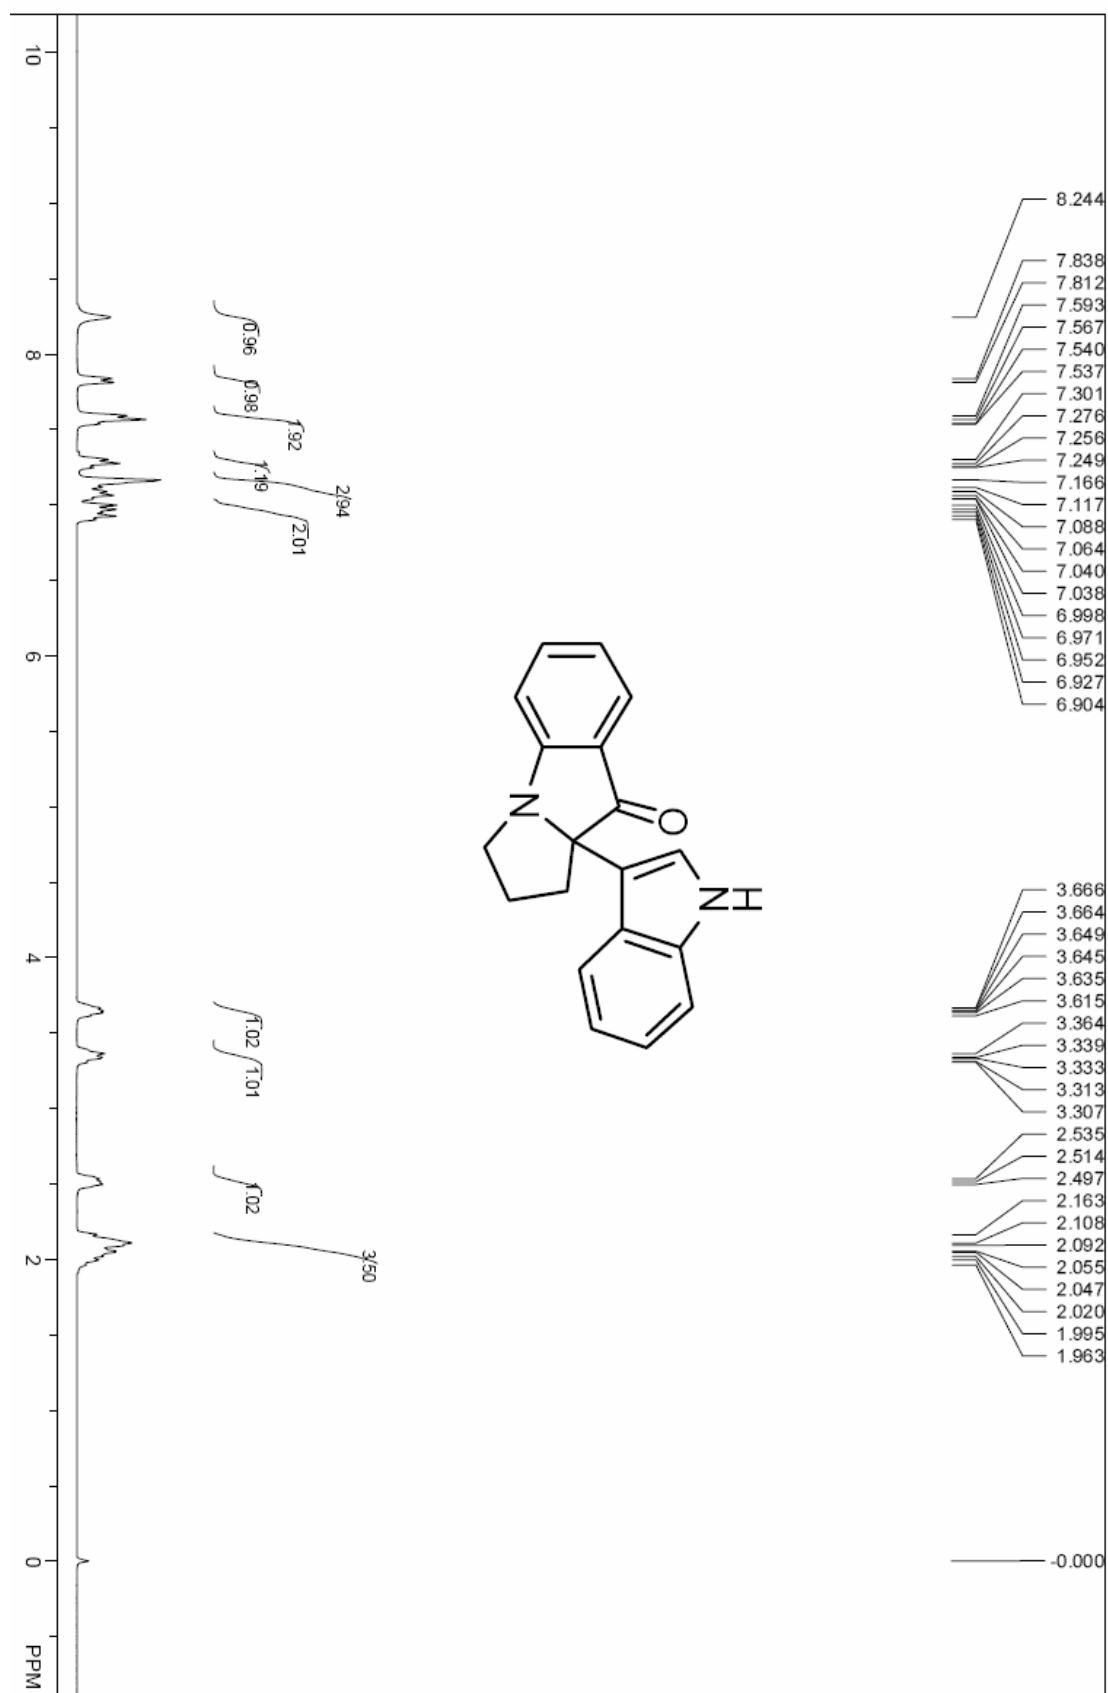



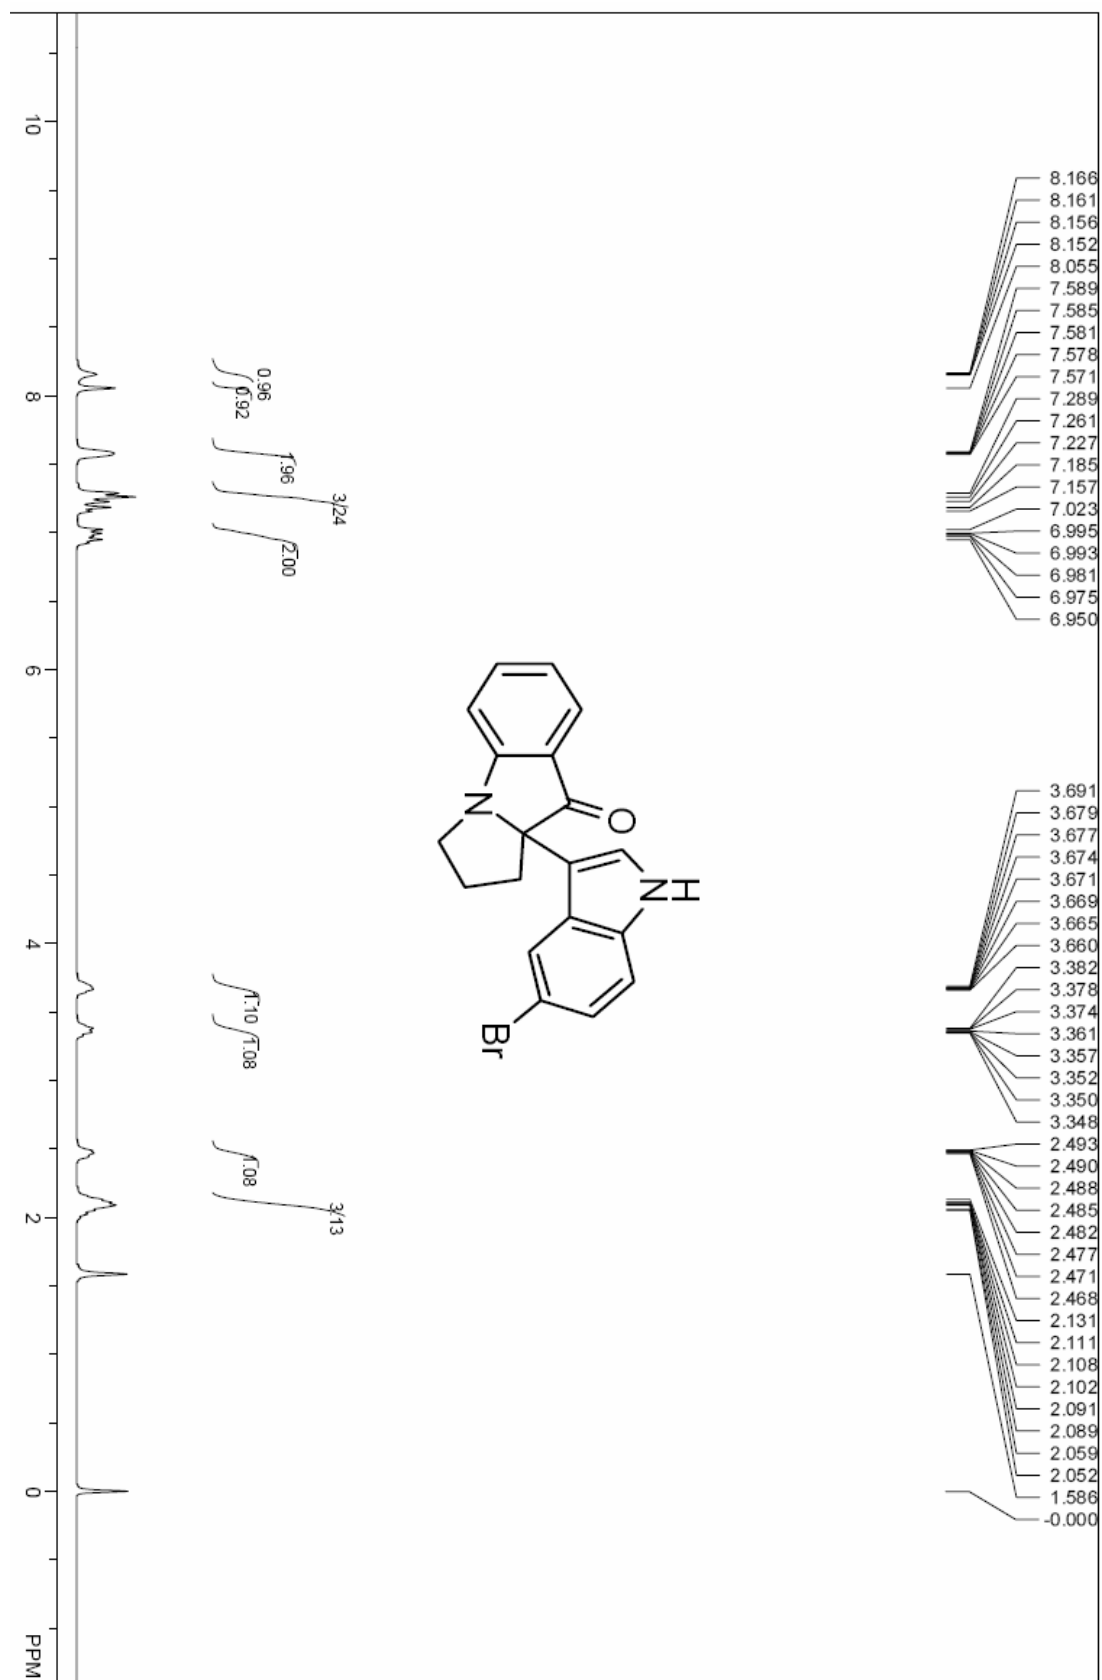

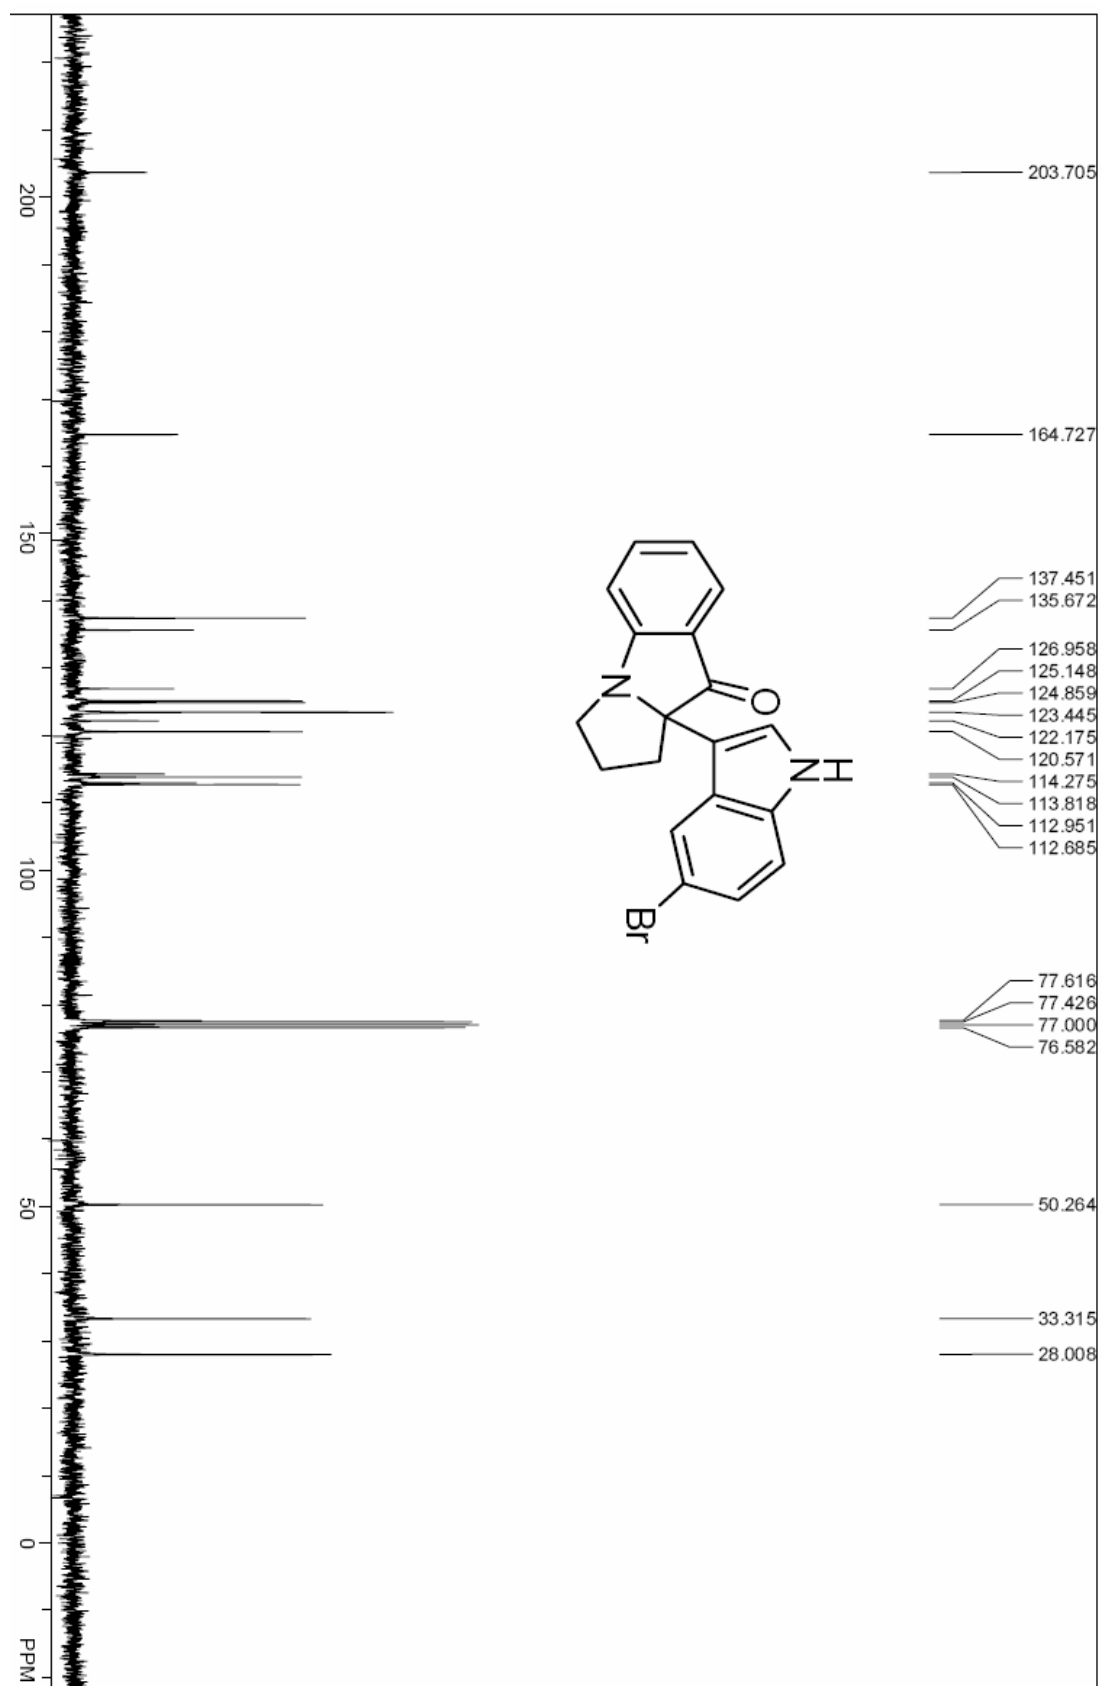

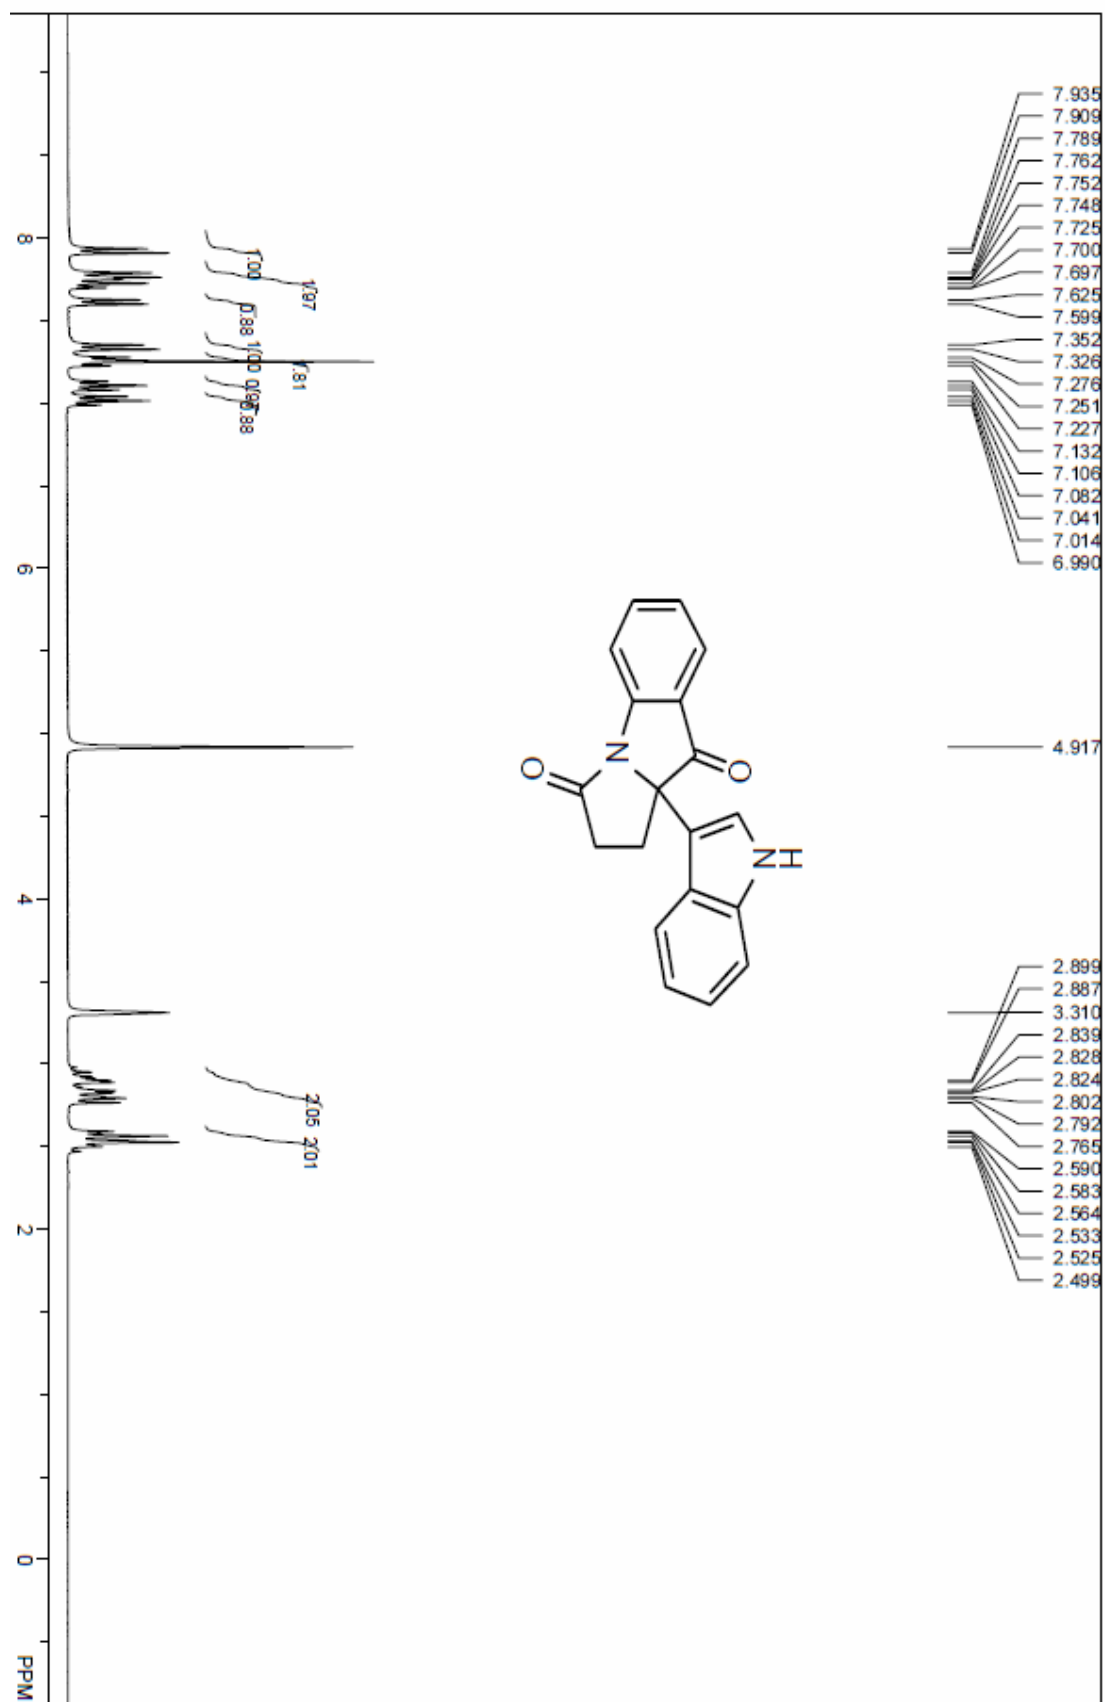

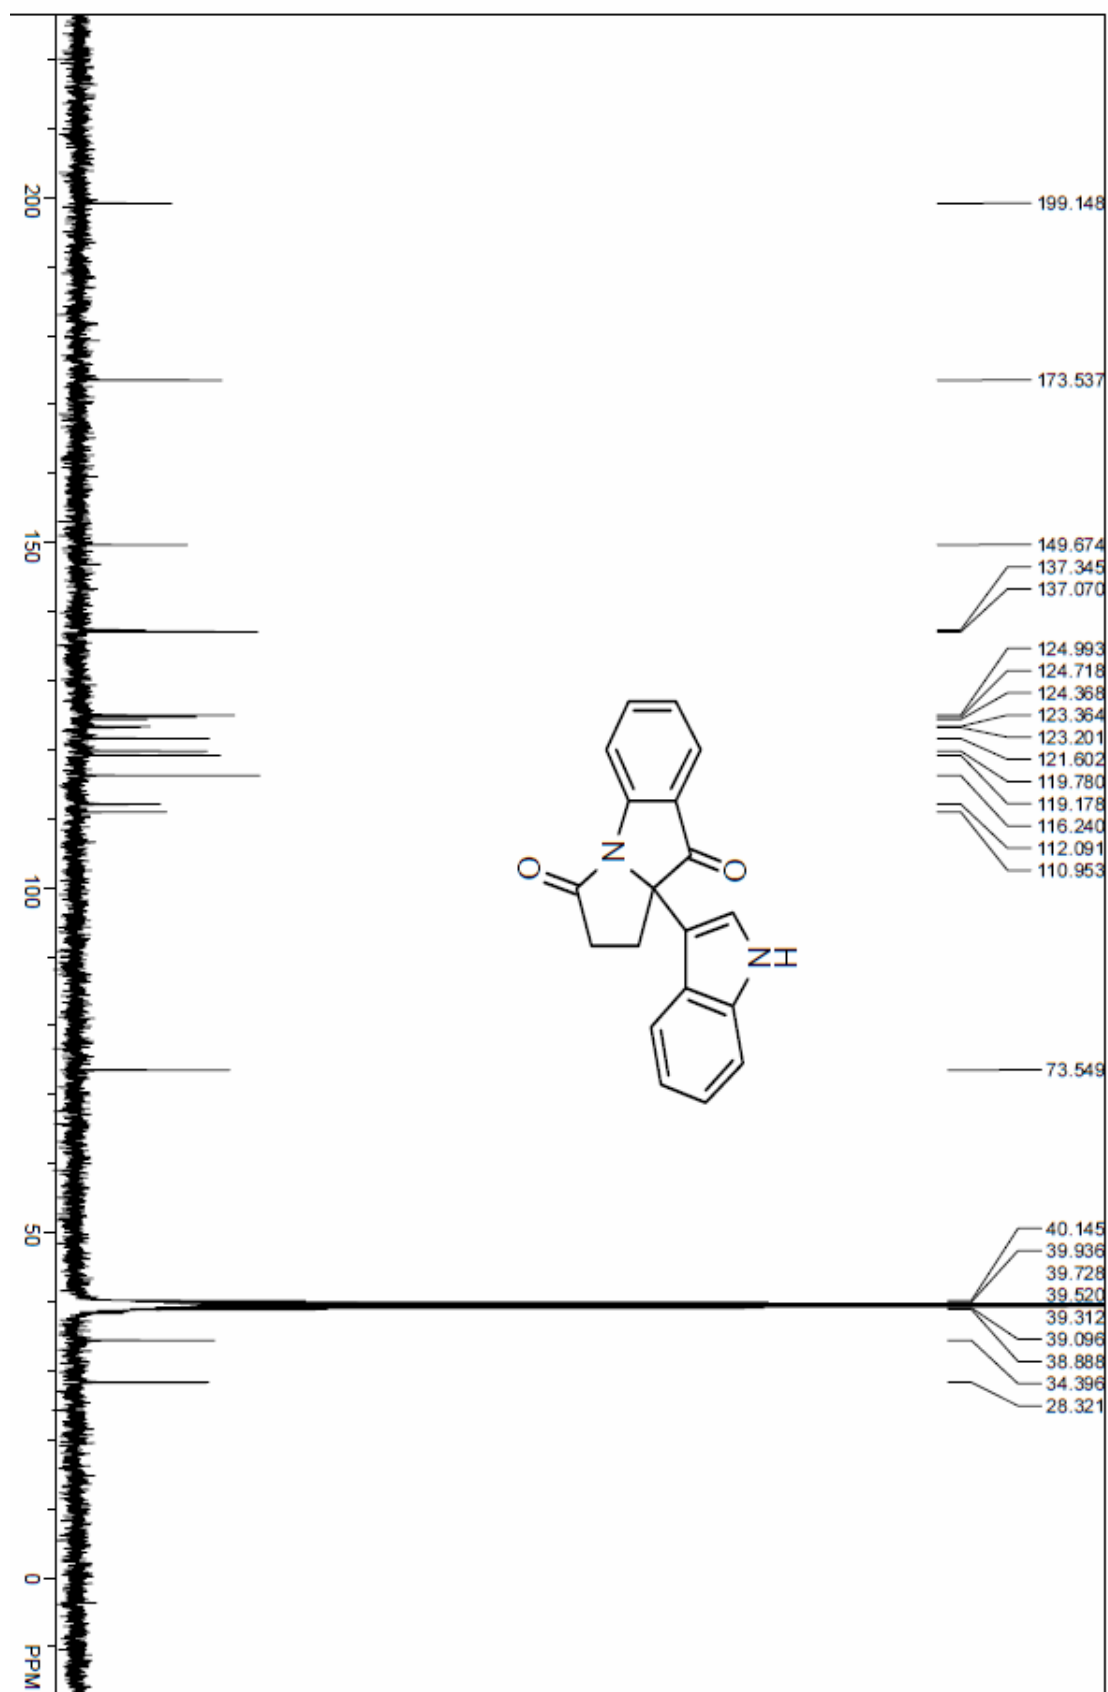

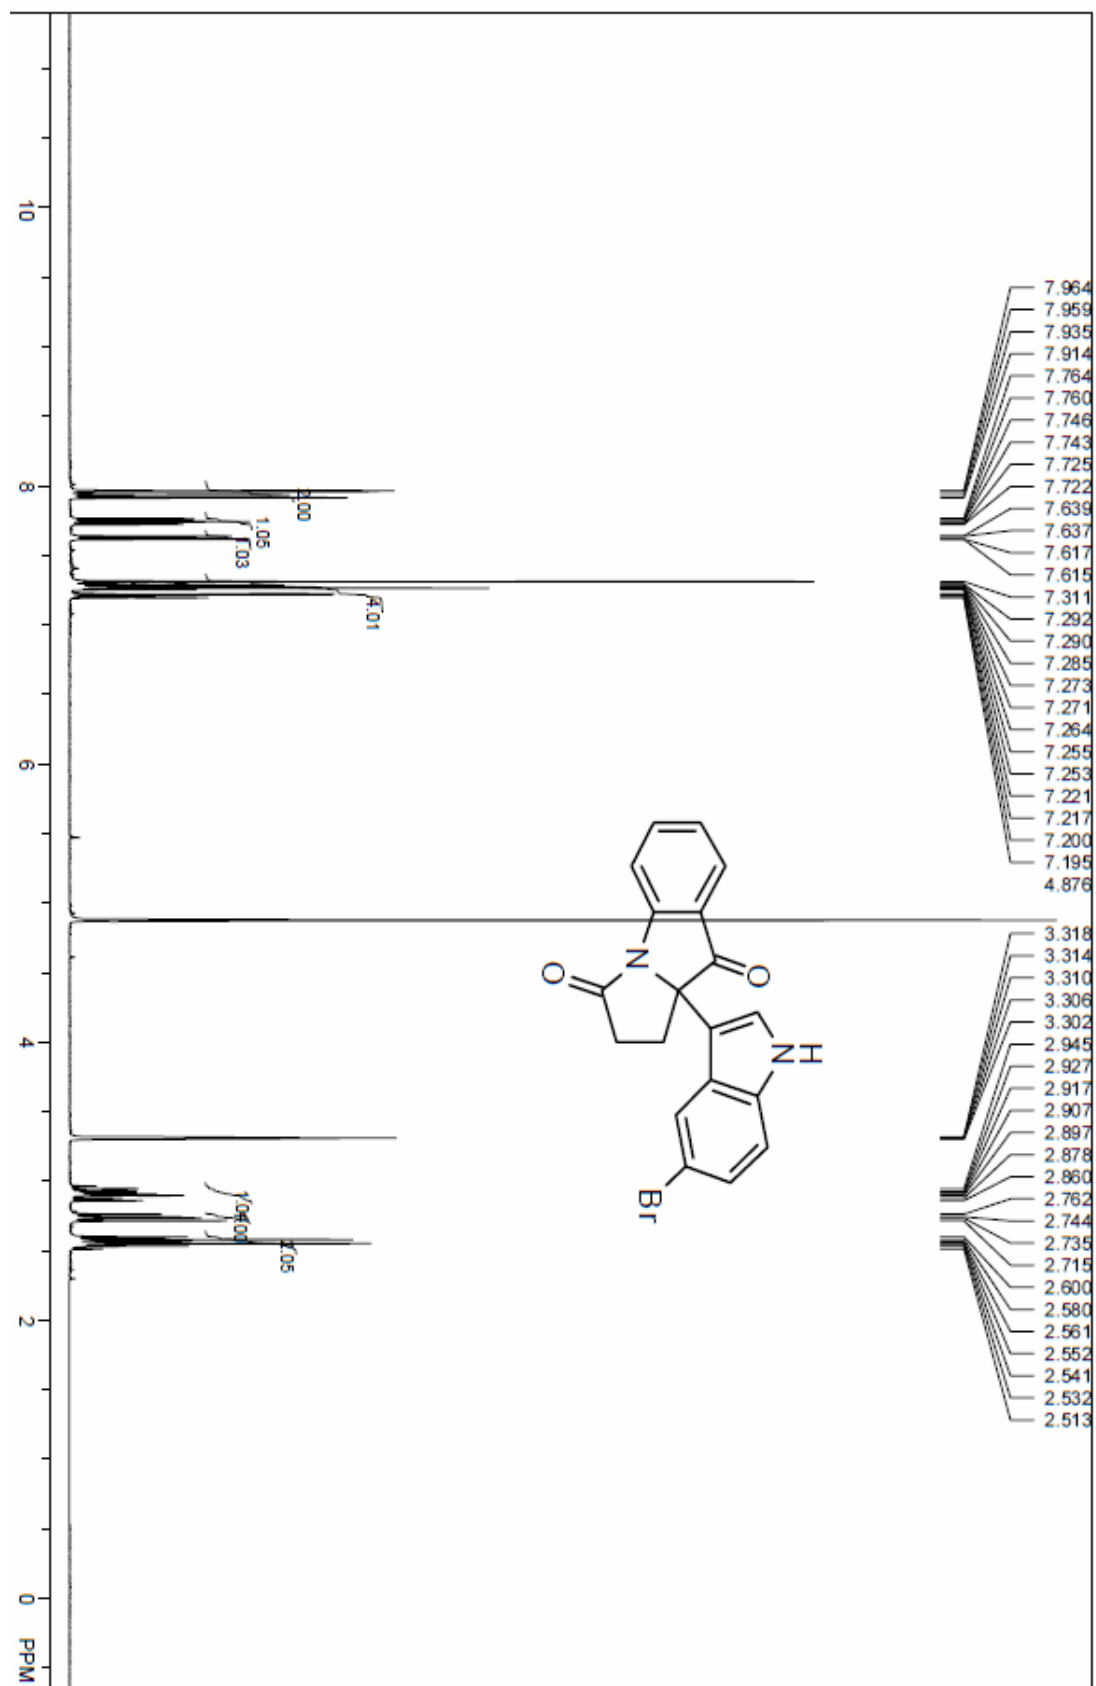

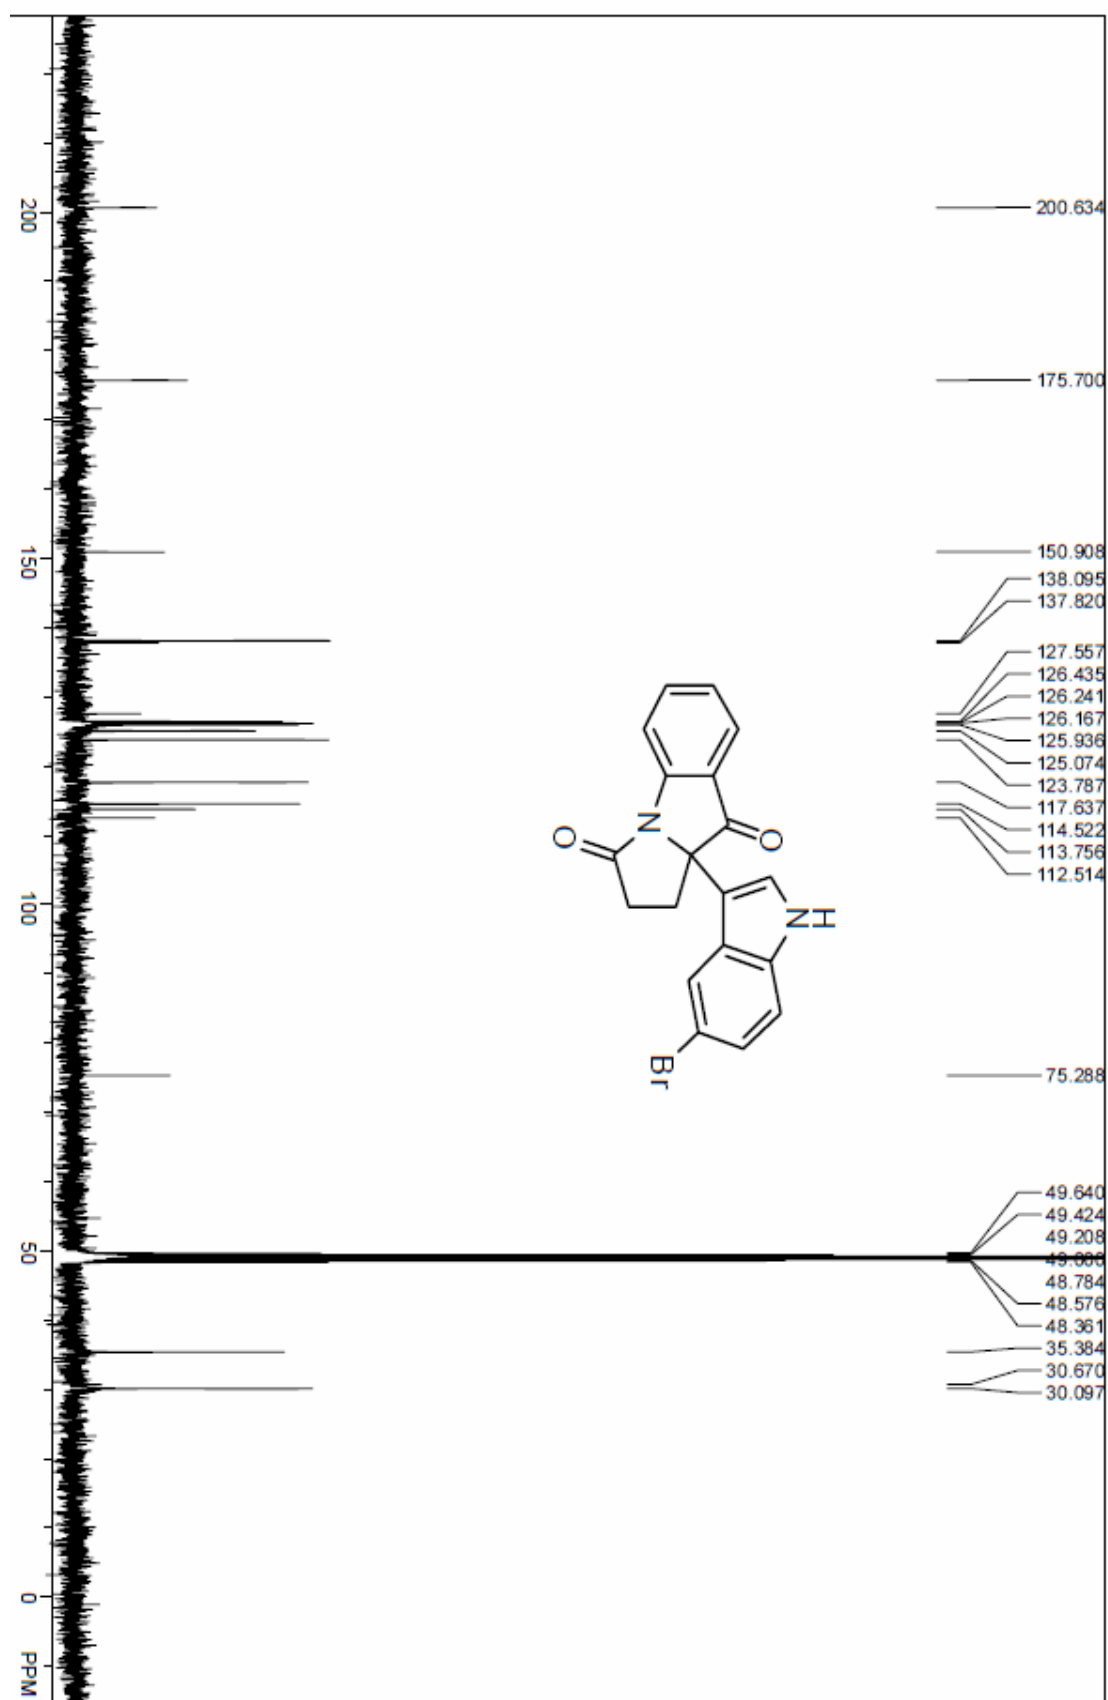

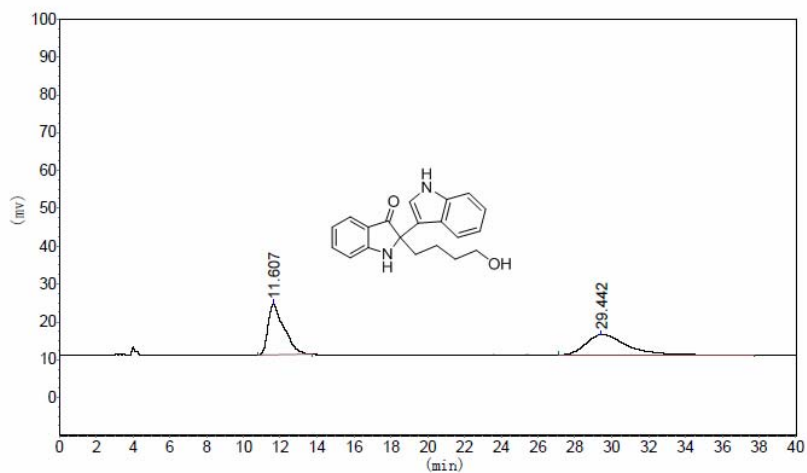

| Peak No.     | R. Time | Peak Height | Peak Area   | Percent  |
|--------------|---------|-------------|-------------|----------|
| 1            | 11.607  | 13375.315   | 802348.375  | 49.9414  |
| 2            | 29.442  | 5319.501    | 804231.188  | 50.0586  |
| <b>Total</b> |         | 18694.817   | 1606579.563 | 100.0000 |

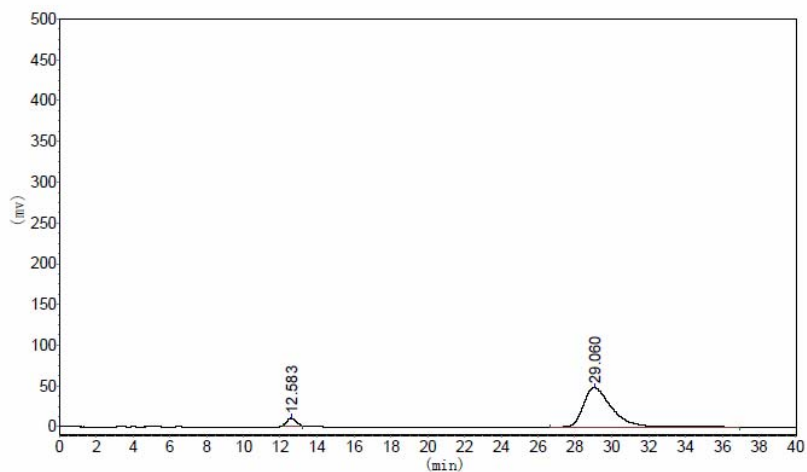

| Peak No.     | R. Time | Peak Height | Peak Area   | Percent  |
|--------------|---------|-------------|-------------|----------|
| 1            | 12.583  | 9968.079    | 322831.000  | 5.8669   |
| 2            | 29.060  | 48199.848   | 5179714.500 | 94.1331  |
| <b>Total</b> |         | 58167.927   | 5502545.500 | 100.0000 |

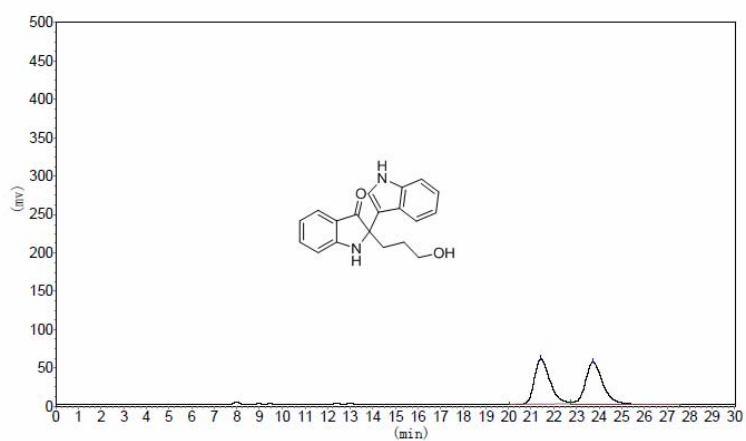

| Peak No.     | R. Time | Peak Height | Peak Area   | Percent  |
|--------------|---------|-------------|-------------|----------|
| 1            | 21.430  | 58587.496   | 2773874.500 | 49.0880  |
| 2            | 23.732  | 54104.691   | 2876941.750 | 50.9120  |
| <b>Total</b> |         | 112692.188  | 5650816.250 | 100.0000 |

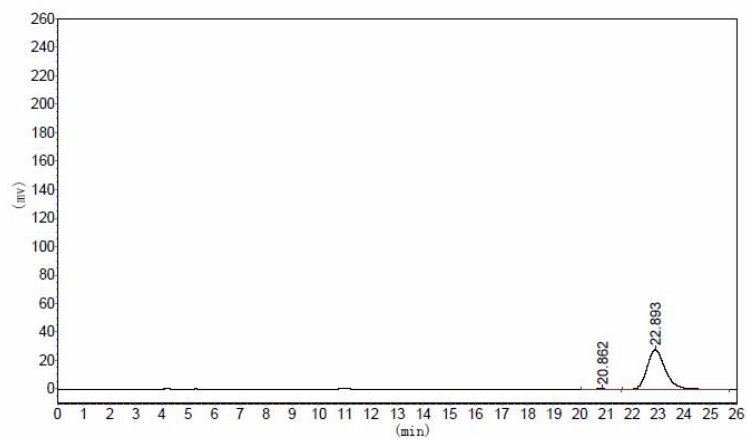

| Peak No.     | R. Time | Peak Height | Peak Area   | Percent  |
|--------------|---------|-------------|-------------|----------|
| 1            | 20.862  | 210.112     | 8782.251    | 0.6576   |
| 2            | 22.893  | 27628.193   | 1326682.500 | 99.3424  |
| <b>Total</b> |         | 27838.305   | 1335464.751 | 100.0000 |



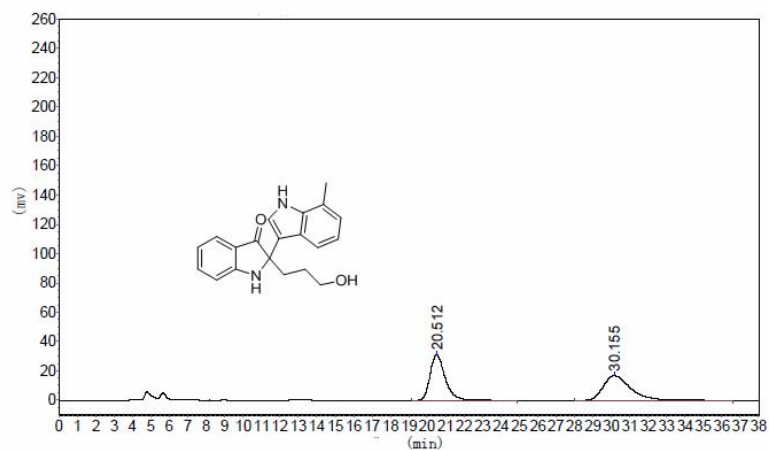

| Peak No.     | R. Time | Peak Height | Peak Area   | Percent  |
|--------------|---------|-------------|-------------|----------|
| 1            | 20.512  | 31226.230   | 1800871.000 | 50.3036  |
| 2            | 30.155  | 16978.963   | 1779135.375 | 49.6964  |
| <b>Total</b> |         | 48205.193   | 3580006.375 | 100.0000 |

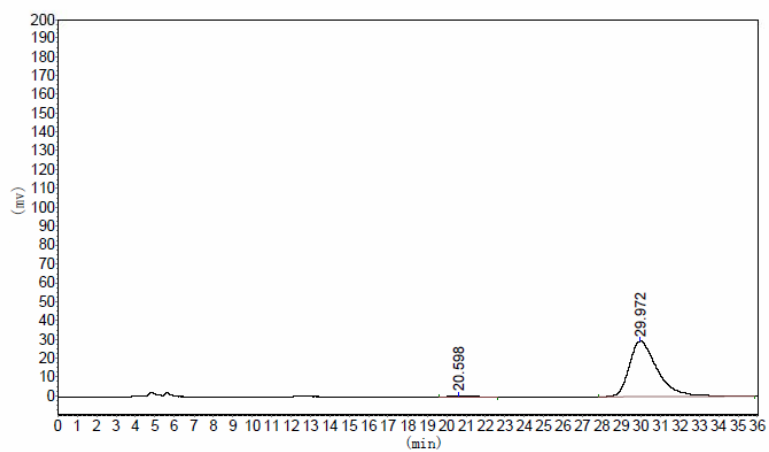

| Peak No.     | R. Time | Peak Height | Peak Area   | Percent  |
|--------------|---------|-------------|-------------|----------|
| 1            | 20.598  | 389.005     | 24284.148   | 0.8200   |
| 2            | 29.972  | 29408.941   | 2937228.000 | 99.1800  |
| <b>Total</b> |         | 29797.946   | 2961512.148 | 100.0000 |

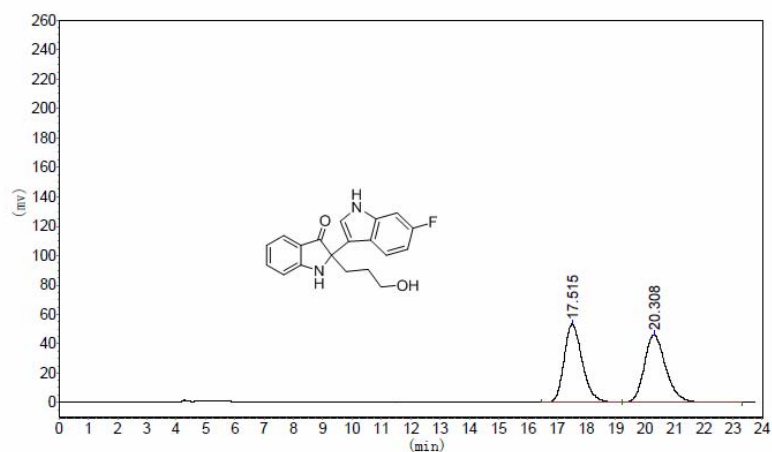

| Peak No.     | R. Time | Peak Height | Peak Area   | Percent  |
|--------------|---------|-------------|-------------|----------|
| 1            | 17.515  | 53373.727   | 2305946.750 | 49.4984  |
| 2            | 20.308  | 45969.375   | 2352679.250 | 50.5016  |
| <b>Total</b> |         | 99343.102   | 4658626.000 | 100.0000 |

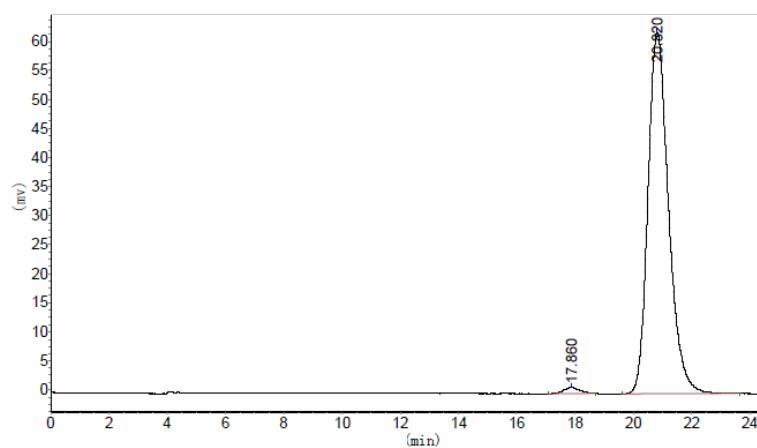

| Peak No.     | R. Time | Peak Height | Peak Area   | Percent  |
|--------------|---------|-------------|-------------|----------|
| 1            | 17.860  | 1018.834    | 39118.500   | 1.2681   |
| 2            | 20.820  | 62225.559   | 3045794.500 | 98.7319  |
| <b>Total</b> |         | 63244.393   | 3084913.000 | 100.0000 |

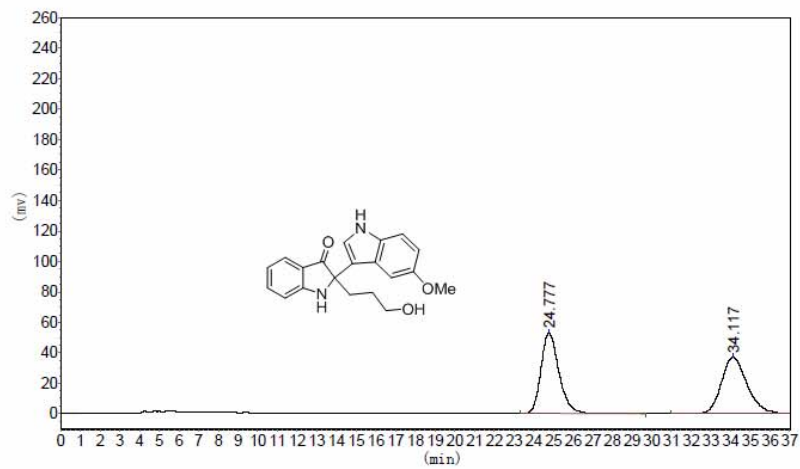

| Peak No.     | R. Time | Peak Height | Peak Area   | Percent  |
|--------------|---------|-------------|-------------|----------|
| 1            | 24.777  | 52786.324   | 3340727.250 | 49.9674  |
| 2            | 34.117  | 36850.055   | 3345089.250 | 50.0326  |
| <b>Total</b> |         | 89636.379   | 6685816.500 | 100.0000 |

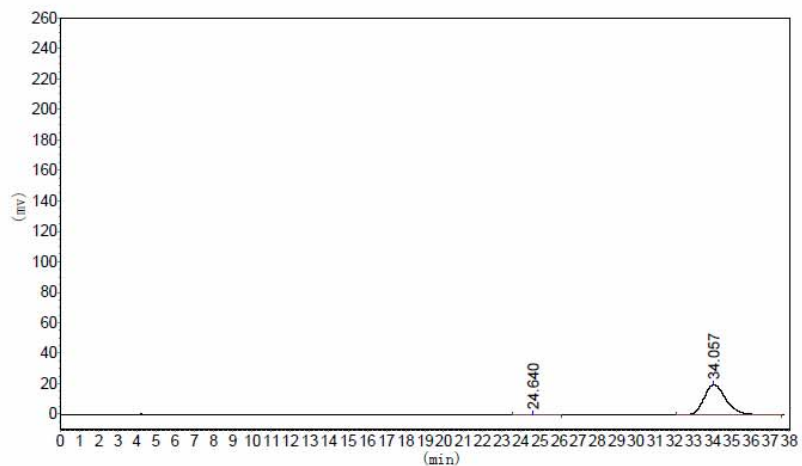

| Peak No.     | R. Time | Peak Height | Peak Area   | Percent  |
|--------------|---------|-------------|-------------|----------|
| 1            | 24.640  | 246.090     | 14912.805   | 0.9194   |
| 2            | 34.057  | 19900.135   | 1607048.000 | 99.0806  |
| <b>Total</b> |         | 20146.225   | 1621960.805 | 100.0000 |

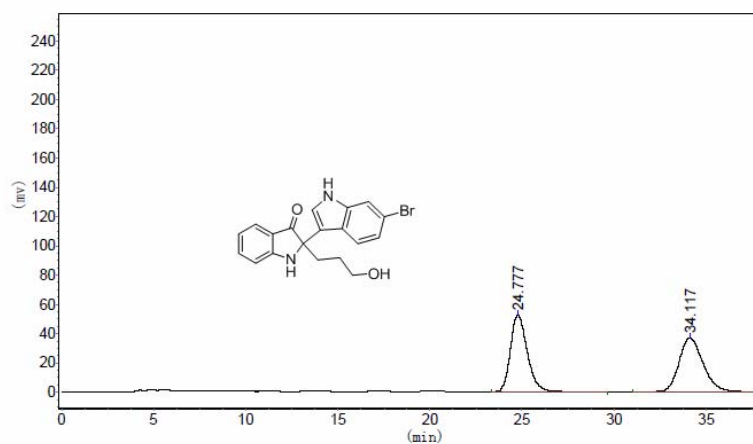

| Peak No.     | R. Time | Peak Height | Peak Area   | Percent  |
|--------------|---------|-------------|-------------|----------|
| 1            | 24.777  | 52786.324   | 3340727.250 | 49.9674  |
| 2            | 34.117  | 36850.055   | 3345089.250 | 50.0326  |
| <b>Total</b> |         | 89636.379   | 6685816.500 | 100.0000 |

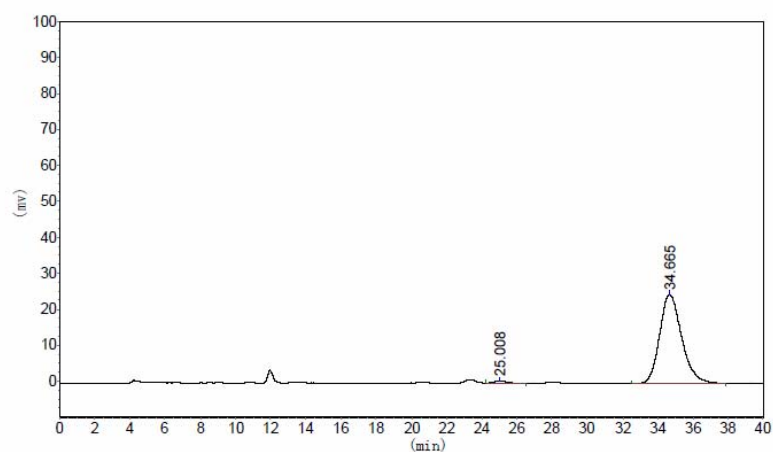

| Peak No.     | R. Time | Peak Height | Peak Area   | Percent  |
|--------------|---------|-------------|-------------|----------|
| 1            | 25.008  | 520.615     | 30568.508   | 1.3983   |
| 2            | 34.665  | 24693.051   | 2155519.500 | 98.6017  |
| <b>Total</b> |         | 25213.665   | 2186088.008 | 100.0000 |

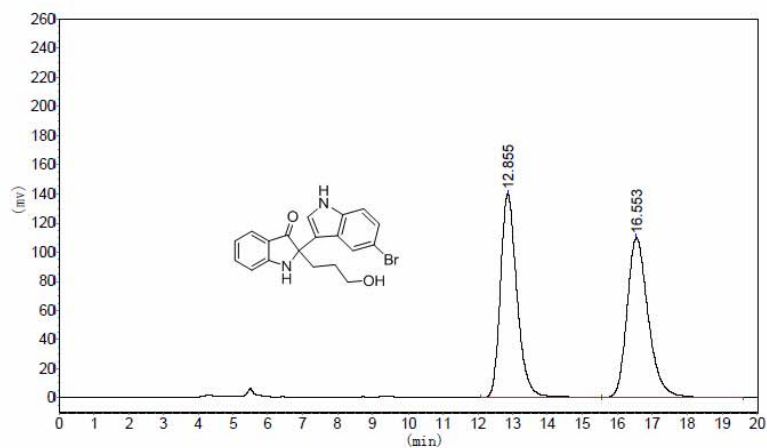

| Peak No.     | R. Time | Peak Height | Peak Area   | Percent  |
|--------------|---------|-------------|-------------|----------|
| 1            | 12.855  | 139742.859  | 4630792.500 | 49.9649  |
| 2            | 16.553  | 109522.313  | 4637306.500 | 50.0351  |
| <b>Total</b> |         | 249265.172  | 9268099.000 | 100.0000 |

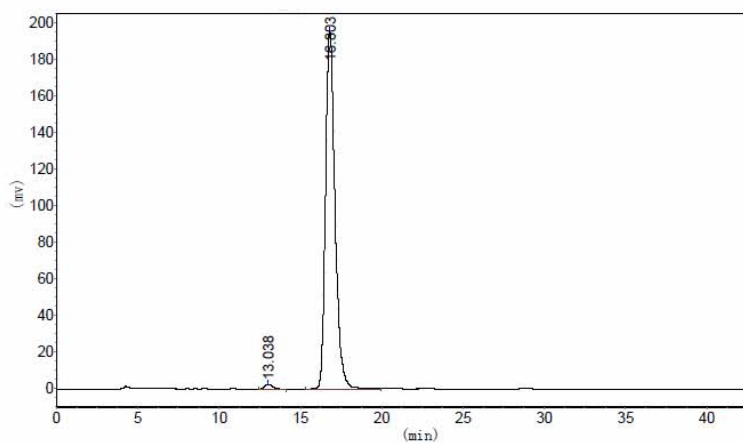

| Peak No.     | R. Time | Peak Height | Peak Area   | Percent  |
|--------------|---------|-------------|-------------|----------|
| 1            | 13.038  | 2492.940    | 78088.898   | 0.9745   |
| 2            | 16.803  | 195839.047  | 7935084.000 | 99.0255  |
| <b>Total</b> |         | 198331.987  | 8013172.898 | 100.0000 |

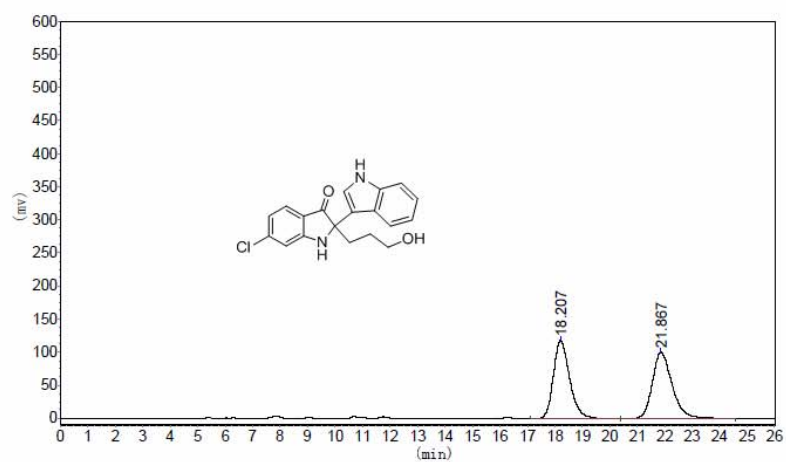

| Peak No.     | R. Time | Peak Height | Peak Area   | Percent  |
|--------------|---------|-------------|-------------|----------|
| 1            | 18.207  | 118180.836  | 4876387.500 | 49.2440  |
| 2            | 21.867  | 100128.313  | 5026114.500 | 50.7560  |
| <b>Total</b> |         | 218309.148  | 9902502.000 | 100.0000 |

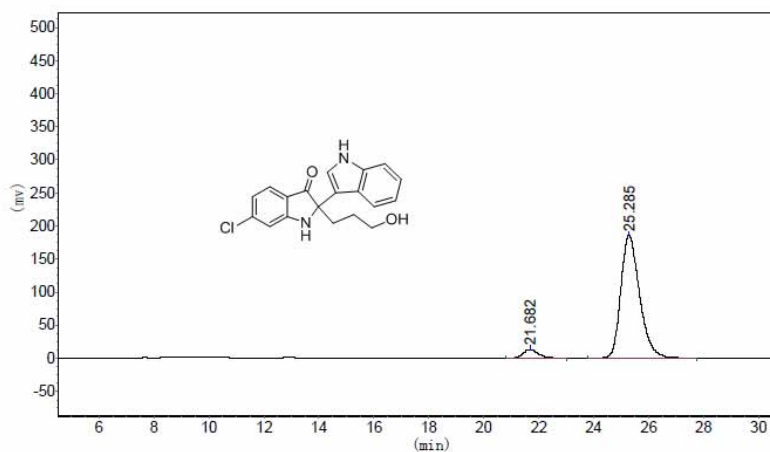

| Peak No.     | R. Time | Peak Height | Peak Area   | Percent  |
|--------------|---------|-------------|-------------|----------|
| 1            | 21.682  | 12955.536   | 503844.000  | 5.4001   |
| 2            | 25.285  | 185135.719  | 8826447.000 | 94.5999  |
| <b>Total</b> |         | 198091.255  | 9330291.000 | 100.0000 |

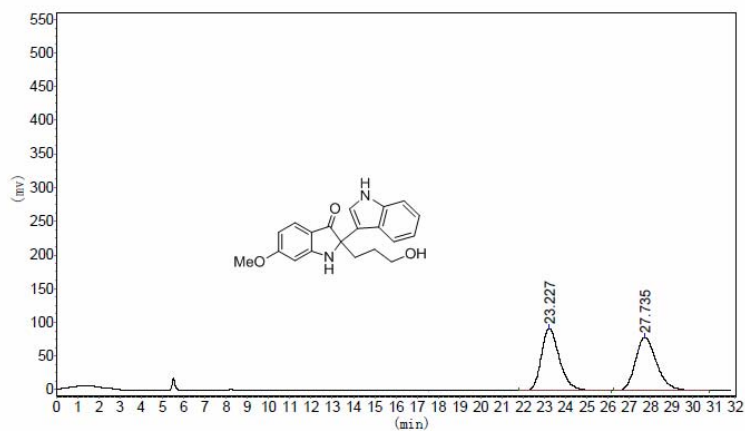

| Peak No.     | R. Time | Peak Height | Peak Area    | Percent  |
|--------------|---------|-------------|--------------|----------|
| 1            | 23.227  | 92586.289   | 5527307.000  | 49.9691  |
| 2            | 27.735  | 79403.813   | 5534144.000  | 50.0309  |
| <b>Total</b> |         | 171990.102  | 11061451.000 | 100.0000 |

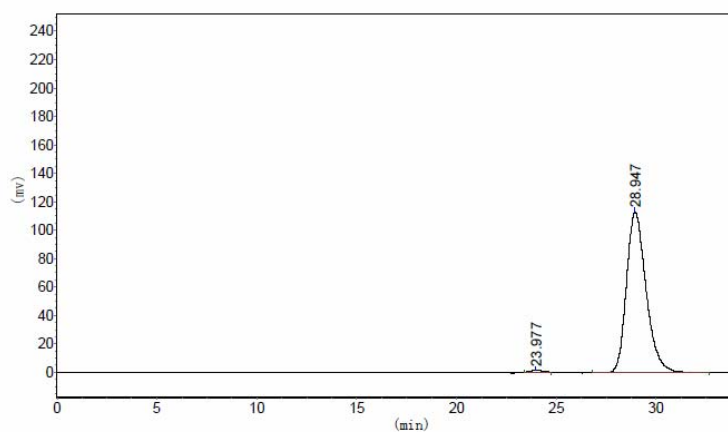

| Peak No.     | R. Time | Peak Height | Peak Area   | Percent  |
|--------------|---------|-------------|-------------|----------|
| 1            | 23.977  | 1422.088    | 61849.402   | 0.7929   |
| 2            | 28.947  | 113220.938  | 7738811.000 | 99.2071  |
| <b>Total</b> |         | 114643.026  | 7800660.402 | 100.0000 |

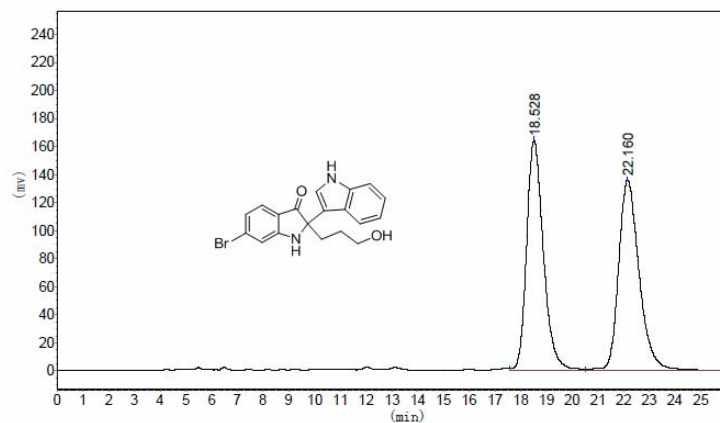

| Peak No.     | R. Time | Peak Height | Peak Area    | Percent  |
|--------------|---------|-------------|--------------|----------|
| 1            | 18.528  | 163850.656  | 7404722.000  | 49.6948  |
| 2            | 22.160  | 135587.844  | 7495676.500  | 50.3052  |
| <b>Total</b> |         | 299438.500  | 14900398.500 | 100.0000 |

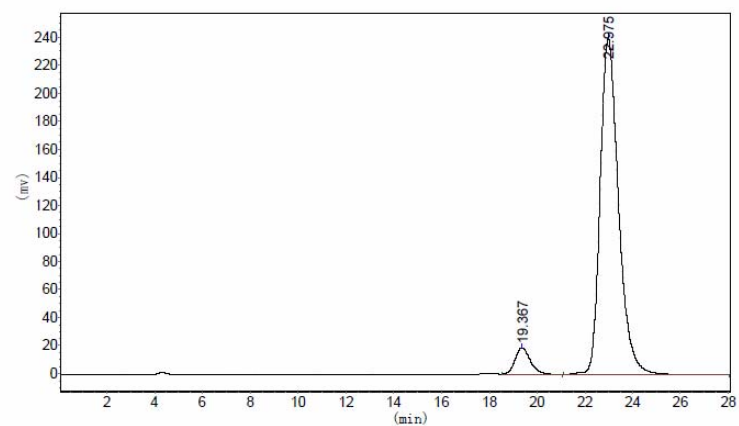

| Peak No.     | R. Time | Peak Height | Peak Area    | Percent  |
|--------------|---------|-------------|--------------|----------|
| 1            | 19.367  | 19104.143   | 858139.375   | 6.2798   |
| 2            | 22.975  | 239823.406  | 12807024.000 | 93.7202  |
| <b>Total</b> |         | 258927.549  | 13665163.375 | 100.0000 |



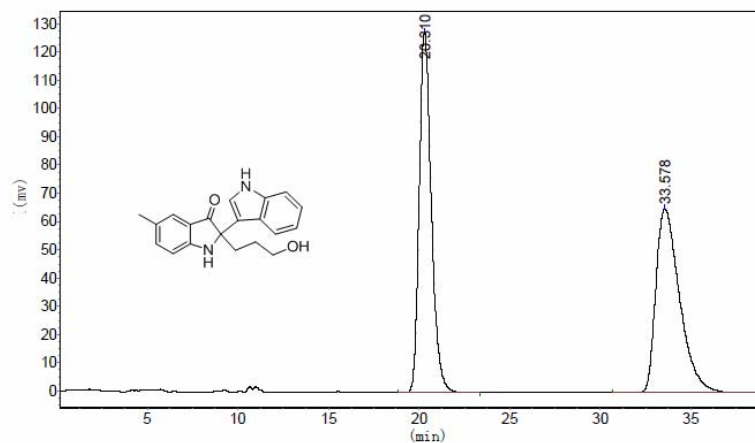

| Peak No.     | R. Time | Peak Height | Peak Area    | Percent  |
|--------------|---------|-------------|--------------|----------|
| 1            | 20.310  | 127546.203  | 5957971.000  | 50.0292  |
| 2            | 33.578  | 65197.488   | 5951026.000  | 49.9708  |
| <b>Total</b> |         | 192743.691  | 11908997.000 | 100.0000 |

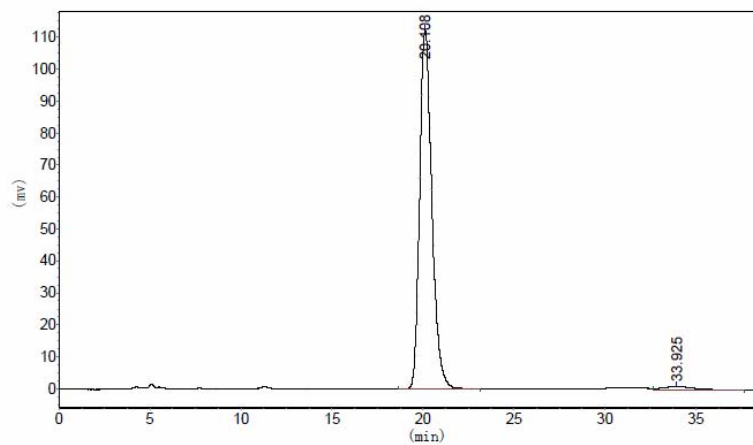

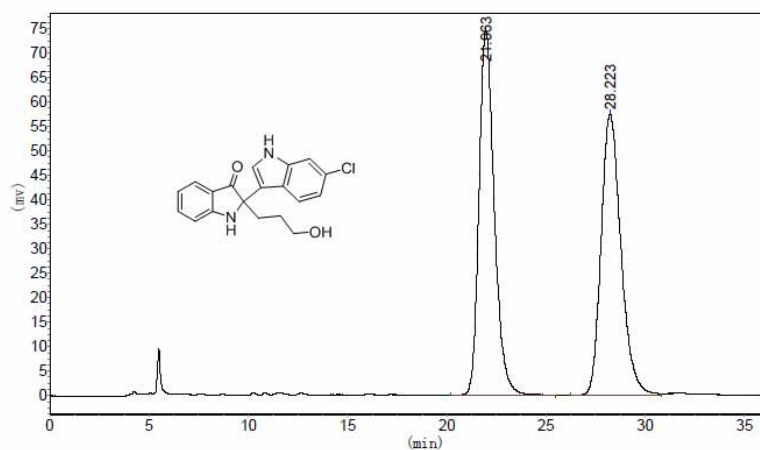

| Peak No.     | R. Time | Peak Height | Peak Area   | Percent  |
|--------------|---------|-------------|-------------|----------|
| 1            | 21.963  | 74299.680   | 3980636.500 | 49.9603  |
| 2            | 28.223  | 57458.410   | 3986955.250 | 50.0397  |
| <b>Total</b> |         | 131758.090  | 7967591.750 | 100.0000 |

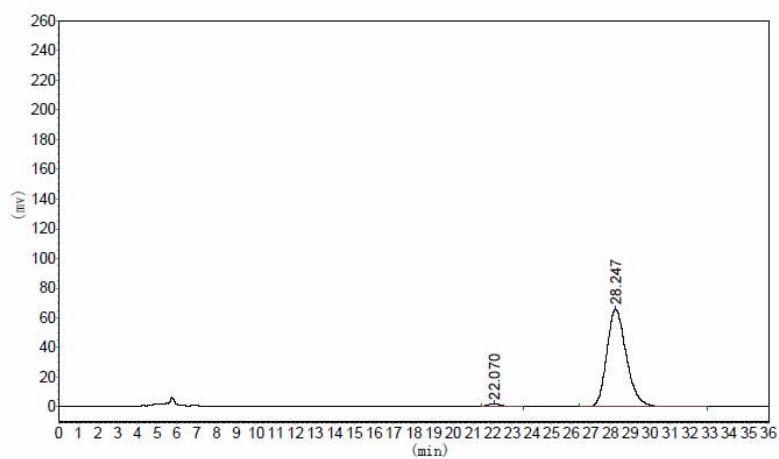

| Peak No.     | R. Time | Peak Height | Peak Area   | Percent  |
|--------------|---------|-------------|-------------|----------|
| 1            | 22.070  | 1879.476    | 99128.086   | 2.1307   |
| 2            | 28.247  | 65788.648   | 4553201.500 | 97.8693  |
| <b>Total</b> |         | 67668.124   | 4652329.586 | 100.0000 |

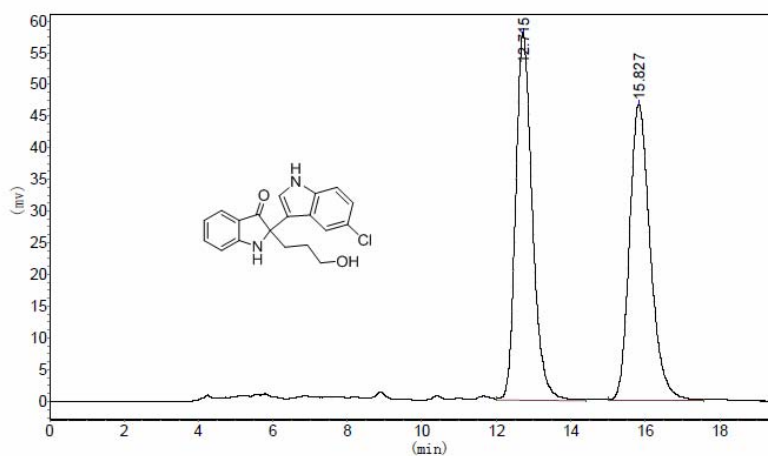

| Peak No.     | R. Time | Peak Height | Peak Area   | Percent  |
|--------------|---------|-------------|-------------|----------|
| 1            | 12.715  | 57997.797   | 1812165.125 | 49.9356  |
| 2            | 15.827  | 46770.836   | 1816837.000 | 50.0644  |
| <b>Total</b> |         | 104768.633  | 3629002.125 | 100.0000 |

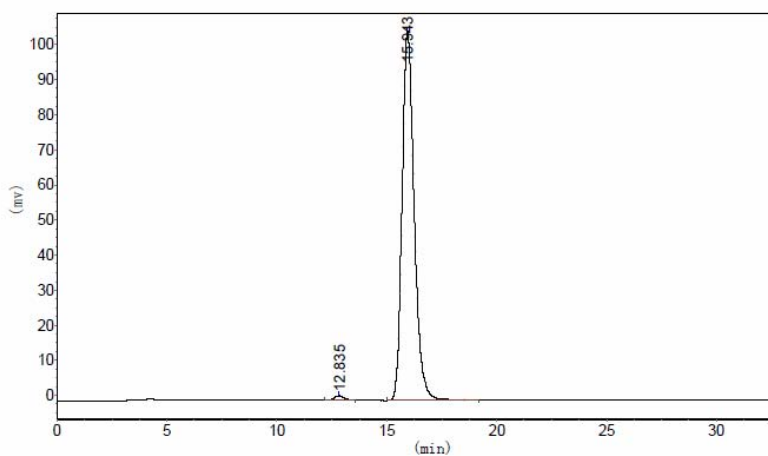

| Peak No.     | R. Time | Peak Height | Peak Area   | Percent  |
|--------------|---------|-------------|-------------|----------|
| 1            | 12.835  | 1332.311    | 40204.500   | 0.9889   |
| 2            | 15.943  | 105119.906  | 4025223.500 | 99.0111  |
| <b>Total</b> |         | 106452.217  | 4065428.000 | 100.0000 |

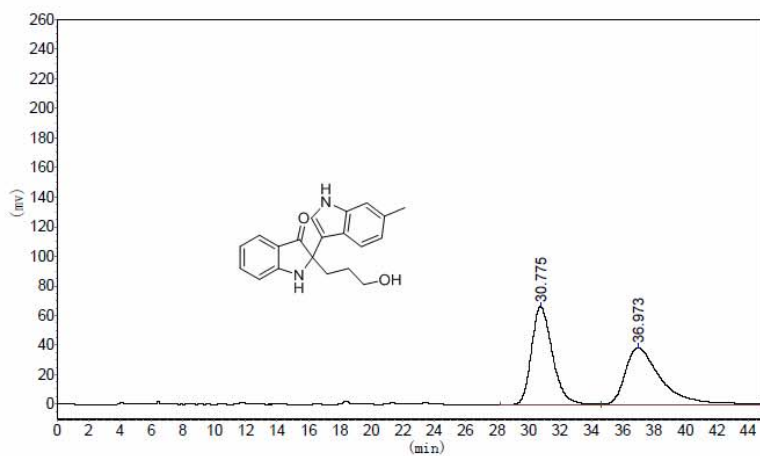

| Peak No.     | R. Time | Peak Height | Peak Area    | Percent  |
|--------------|---------|-------------|--------------|----------|
| 1            | 30.775  | 66262.813   | 6135610.000  | 50.1635  |
| 2            | 36.973  | 38569.965   | 6095603.000  | 49.8365  |
| <b>Total</b> |         | 104832.777  | 12231213.000 | 100.0000 |

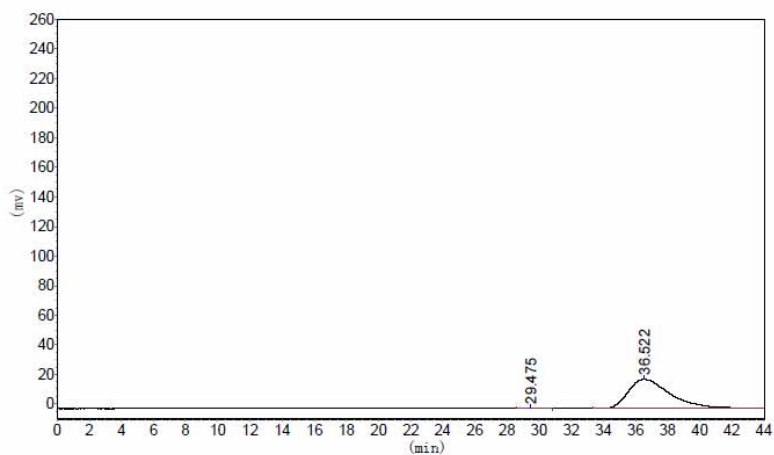

| Peak No.     | R. Time | Peak Height | Peak Area   | Percent  |
|--------------|---------|-------------|-------------|----------|
| 1            | 29.475  | 258.437     | 21069.072   | 0.5552   |
| 2            | 36.522  | 20032.404   | 3773486.500 | 99.4448  |
| <b>Total</b> |         | 20290.841   | 3794555.572 | 100.0000 |

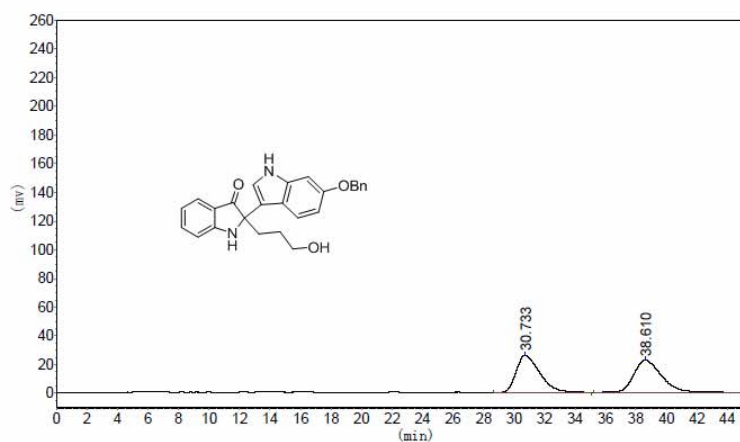

| Peak No.     | R. Time | Peak Height | Peak Area   | Percent  |
|--------------|---------|-------------|-------------|----------|
| 1            | 30.733  | 25686.350   | 2755605.250 | 49.1632  |
| 2            | 38.610  | 22261.916   | 2849406.750 | 50.8368  |
| <b>Total</b> |         | 47948.266   | 5605012.000 | 100.0000 |

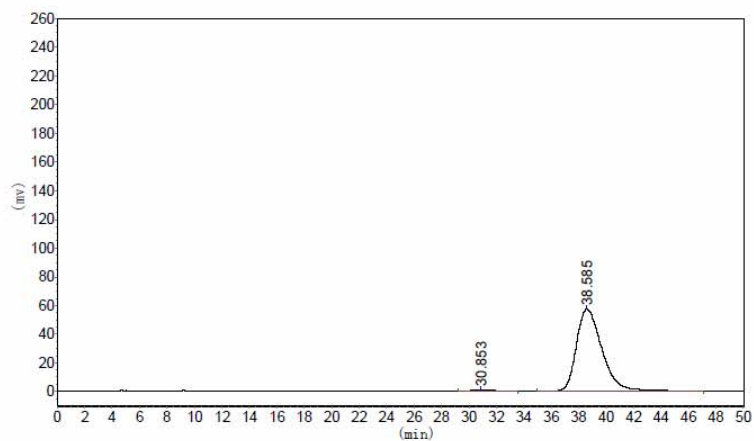

| Peak No.     | R. Time | Peak Height | Peak Area   | Percent  |
|--------------|---------|-------------|-------------|----------|
| 1            | 30.853  | 407.058     | 42328.141   | 0.5801   |
| 2            | 38.585  | 56848.852   | 7254308.000 | 99.4199  |
| <b>Total</b> |         | 57255.909   | 7296636.141 | 100.0000 |

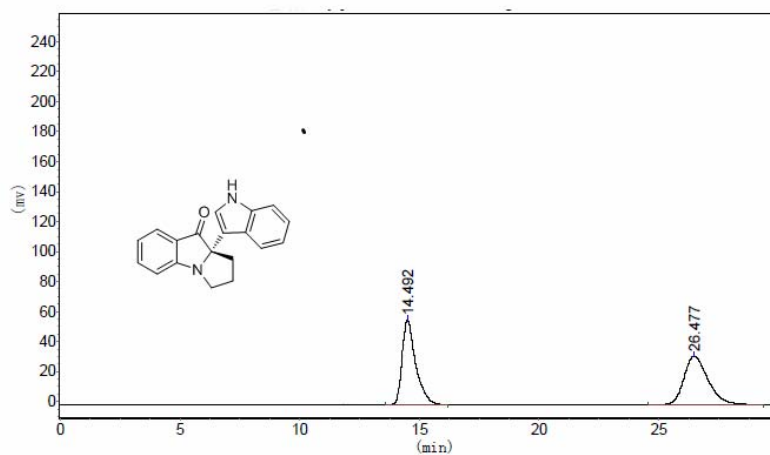

| Peak No.     | R. Time | Peak Height | Peak Area   | Percent  |
|--------------|---------|-------------|-------------|----------|
| 1            | 14.492  | 56551.066   | 2201083.500 | 49.9544  |
| 2            | 26.477  | 32120.406   | 2205098.500 | 50.0456  |
| <b>Total</b> |         | 88671.473   | 4406182.000 | 100.0000 |

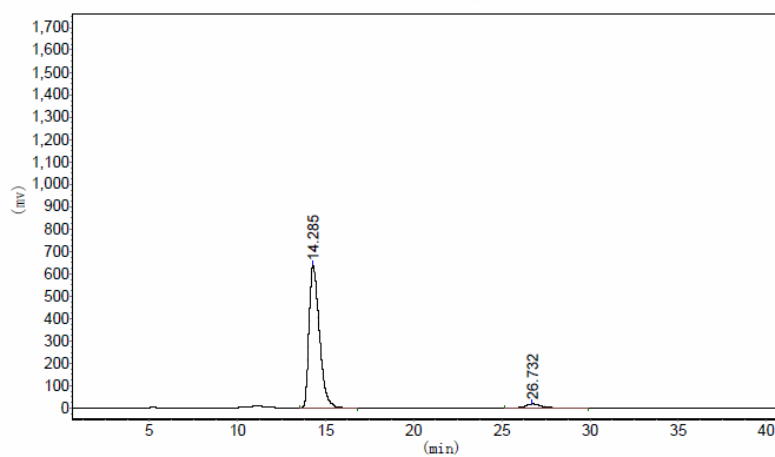

| Peak No.     | R. Time | Peak Height | Peak Area    | Percent  |
|--------------|---------|-------------|--------------|----------|
| 1            | 14.285  | 637539.625  | 25837352.000 | 95.7817  |
| 2            | 26.732  | 16893.996   | 1137902.125  | 4.2183   |
| <b>Total</b> |         | 654433.621  | 26975254.125 | 100.0000 |

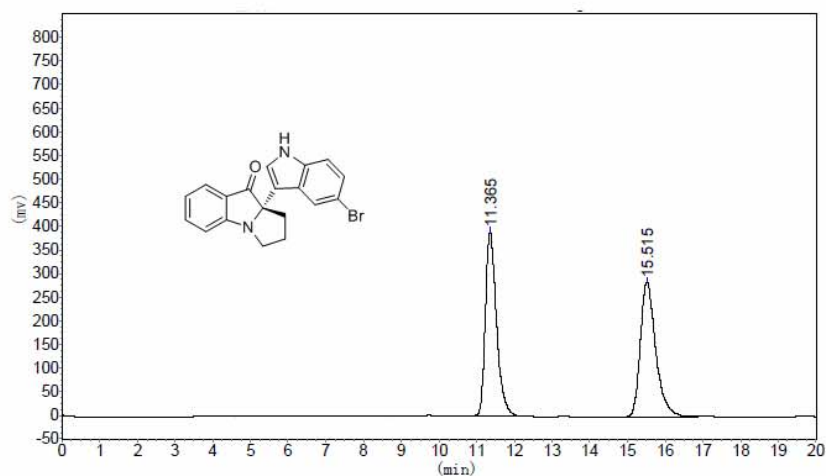

| Peak No.     | R. Time | Peak Height | Peak Area    | Percent  |
|--------------|---------|-------------|--------------|----------|
| 1            | 11.365  | 392977.563  | 8067949.500  | 49.8494  |
| 2            | 15.515  | 285332.844  | 8116697.000  | 50.1506  |
| <b>Total</b> |         | 678310.406  | 16184646.500 | 100.0000 |

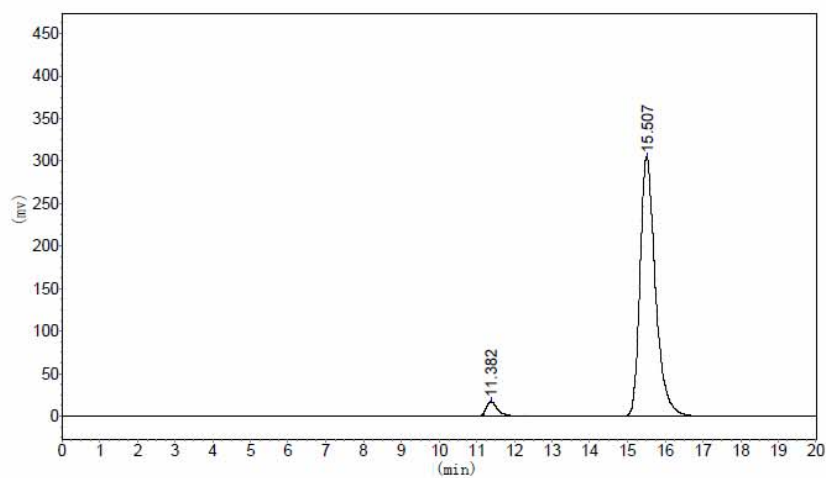

| Peak No.     | R. Time | Peak Height | Peak Area   | Percent  |
|--------------|---------|-------------|-------------|----------|
| 1            | 11.382  | 15256.477   | 270073.406  | 3.0446   |
| 2            | 15.507  | 304082.344  | 8600630.000 | 96.9554  |
| <b>Total</b> |         | 319338.820  | 8870703.406 | 100.0000 |

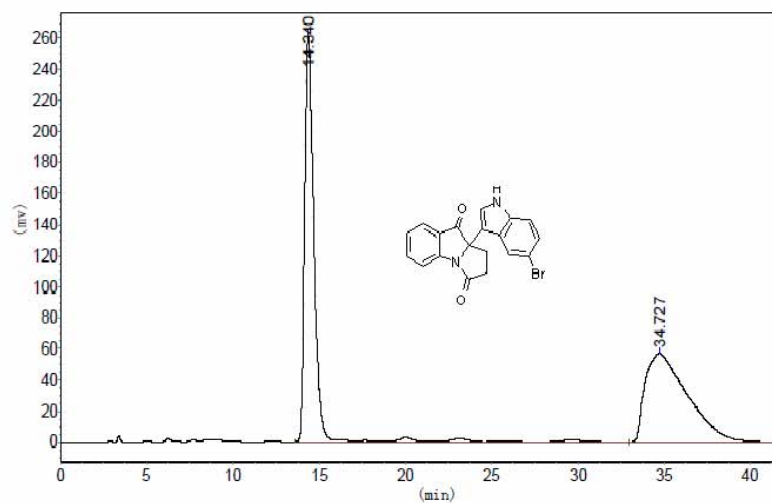

| Peak No.     | R. Time | Peak Height | Peak Area    | Percent  |
|--------------|---------|-------------|--------------|----------|
| 1            | 14.340  | 263503.844  | 10211640.000 | 51.3137  |
| 2            | 34.727  | 57606.629   | 9688763.000  | 48.6863  |
| <b>Total</b> |         | 321110.473  | 19900403.000 | 100.0000 |

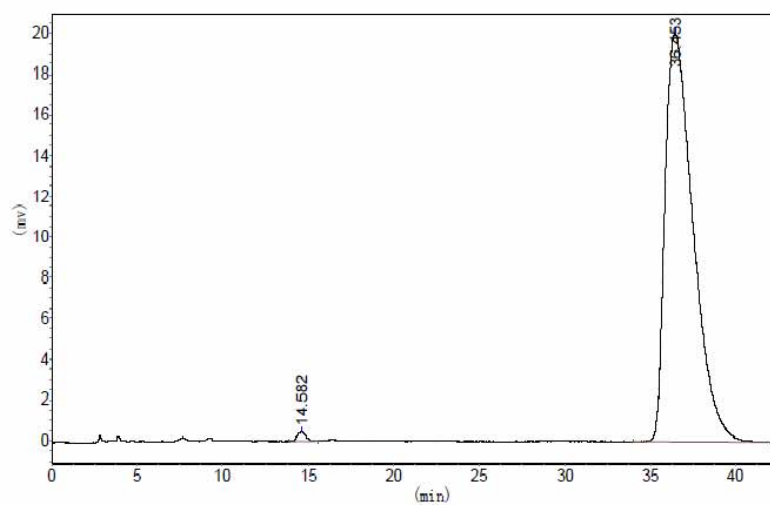

| Peak No.     | R. Time | Peak Height | Peak Area   | Percent  |
|--------------|---------|-------------|-------------|----------|
| 1            | 14.582  | 491.161     | 17505.338   | 0.7570   |
| 2            | 36.453  | 20052.432   | 2295056.750 | 99.2430  |
| <b>Total</b> |         | 20543.593   | 2312562.088 | 100.0000 |



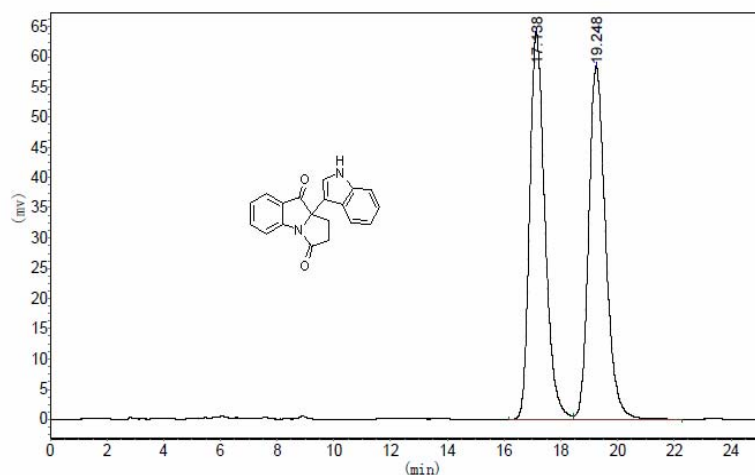

| Peak No.     | R. Time | Peak Height | Peak Area   | Percent  |
|--------------|---------|-------------|-------------|----------|
| 1            | 17.138  | 64042.281   | 2388759.000 | 49.7543  |
| 2            | 19.248  | 58401.031   | 2412355.000 | 50.2457  |
| <b>Total</b> |         | 122443.313  | 4801114.000 | 100.0000 |

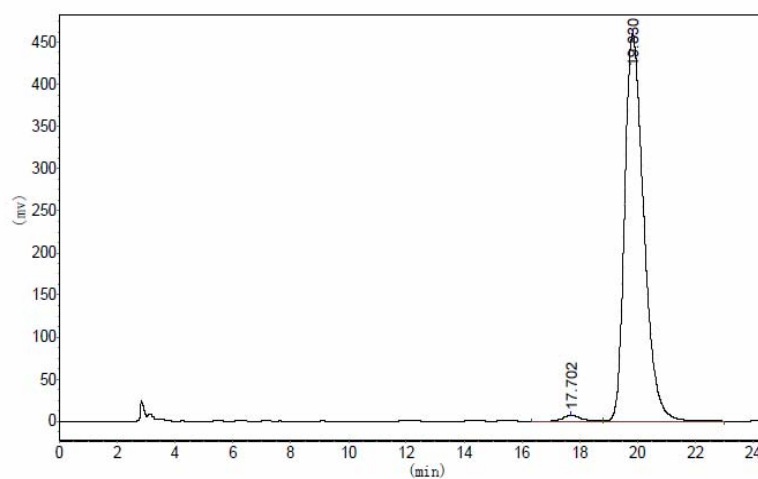

| Peak No.     | R. Time | Peak Height | Peak Area    | Percent  |
|--------------|---------|-------------|--------------|----------|
| 1            | 17.702  | 6954.414    | 288466.656   | 1.3521   |
| 2            | 19.830  | 459248.469  | 21045834.000 | 98.6479  |
| <b>Total</b> |         | 466202.883  | 21334300.656 | 100.0000 |

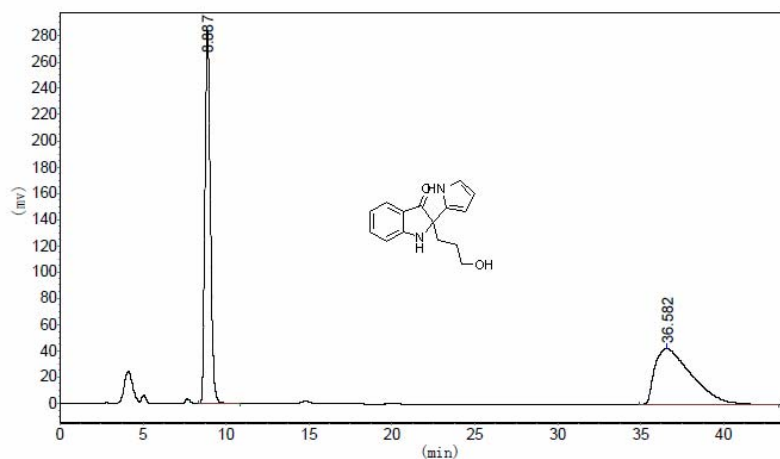

| Peak No.     | R. Time | Peak Height | Peak Area    | Percent  |
|--------------|---------|-------------|--------------|----------|
| 1            | 8.887   | 284042.563  | 6430490.000  | 49.9665  |
| 2            | 36.582  | 42674.875   | 6439116.000  | 50.0335  |
| <b>Total</b> |         | 326717.438  | 12869606.000 | 100.0000 |

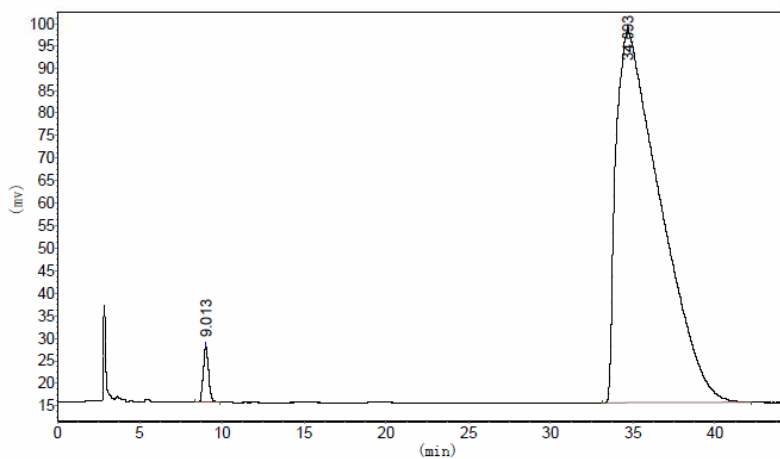

| Peak No.     | R. Time | Peak Height | Peak Area    | Percent  |
|--------------|---------|-------------|--------------|----------|
| 1            | 9.013   | 12378.948   | 277429.344   | 1.7632   |
| 2            | 34.693  | 82793.688   | 15457338.000 | 98.2368  |
| <b>Total</b> |         | 95172.636   | 15734767.344 | 100.0000 |

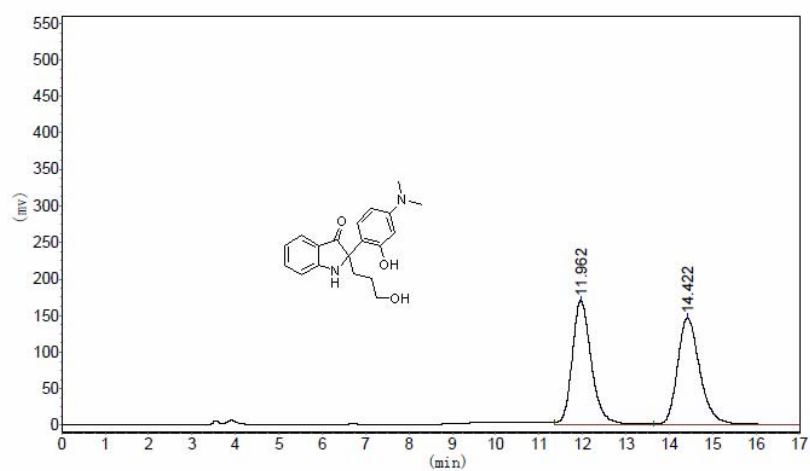

| Peak No.     | R. Time | Peak Height | Peak Area    | Percent  |
|--------------|---------|-------------|--------------|----------|
| 1            | 11.962  | 170045.844  | 5229244.500  | 50.0188  |
| 2            | 14.422  | 146159.984  | 5225309.000  | 49.9812  |
| <b>Total</b> |         | 316205.828  | 10454553.500 | 100.0000 |

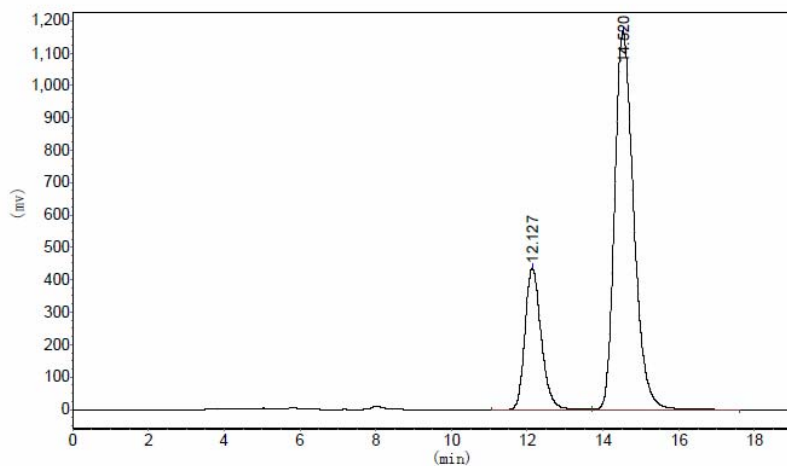

| Peak No.     | R. Time | Peak Height | Peak Area    | Percent  |
|--------------|---------|-------------|--------------|----------|
| 1            | 12.127  | 437730.813  | 13062735.000 | 24.2723  |
| 2            | 14.520  | 1167121.000 | 40754680.000 | 75.7277  |
| <b>Total</b> |         | 1604851.813 | 53817415.000 | 100.0000 |

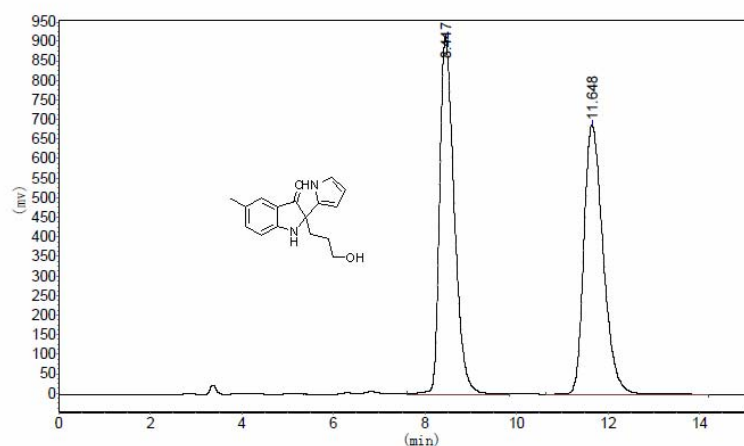

| Peak No.     | R. Time | Peak Height | Peak Area    | Percent  |
|--------------|---------|-------------|--------------|----------|
| 1            | 8.447   | 910868.625  | 20190214.000 | 50.1948  |
| 2            | 11.648  | 689591.438  | 20033536.000 | 49.8052  |
| <b>Total</b> |         | 1600460.063 | 40223750.000 | 100.0000 |

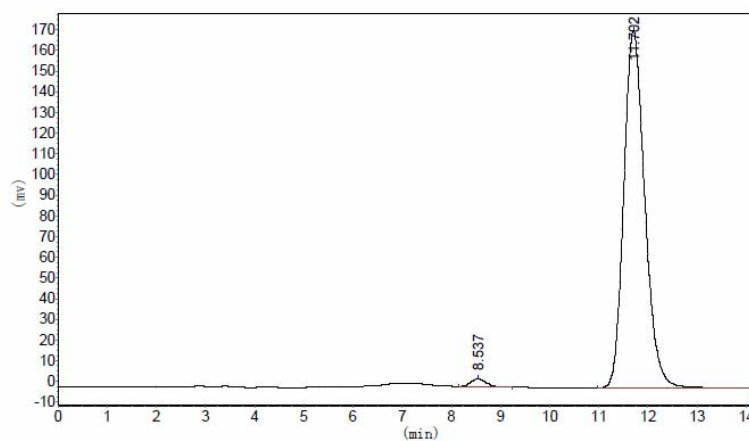

| Peak No.     | R. Time | Peak Height | Peak Area   | Percent  |
|--------------|---------|-------------|-------------|----------|
| 1            | 8.537   | 3888.046    | 89009.711   | 1.7143   |
| 2            | 11.702  | 172333.000  | 5103309.500 | 98.2857  |
| <b>Total</b> |         | 176221.046  | 5192319.211 | 100.0000 |
